# Supplementary material for: Demographic assessment of the Dalmatian dog – effective population size, linkage disequilibrium and inbreeding coefficients
Source: Canine Med Genet. 2020 Mar 26;7:3. doi: 10.1186/s40575-020-00082-y (PMC7371805; doi:10.1186/s40575-020-00082-y)
Supplement: Supplementary file 3 — Additional file 3: Table S1. Candidate gene list for frequent diseases in the Dalmatian dog according to “The veterinary medical guide to dog and cat breeds” and the NCBI database. [file 40575_2020_82_MOESM3_ESM.xlsx]

## Sheet: Tabelle4
Table S1. Candidate gene list for frequent diseases in the Dalmatian dog according to "The veterinary medical guide to dog and cat breeds" and the NCBI database.
ENSCAFG00000025567	A2M	alpha-2-macroglobulin [Source:HGNC Symbol;Acc:HGNC:7]
ENSCAFG00000010375	A3GALT2	alpha 1,3-galactosyltransferase 2 [Source:HGNC Symbol;Acc:HGNC:30005]
ENSCAFG00000008554	AADAC	arylacetamide deacetylase [Source:VGNC Symbol;Acc:VGNC:37404]
ENSCAFG00000002727	ABCA1	ATP binding cassette subfamily A member 1 [Source:VGNC Symbol;Acc:VGNC:37422]
ENSCAFG00000019379	ABCA3	ATP binding cassette subfamily A member 3 [Source:VGNC Symbol;Acc:VGNC:37426]
ENSCAFG00000001835	ABCB1	ATP binding cassette subfamily B member 1 [Source:VGNC Symbol;Acc:VGNC:37431]
ENSCAFG00000015130	ABCB6	ATP binding cassette subfamily B member 6 (Langereis blood group) [Source:HGNC Symbol;Acc:HGNC:47]
ENSCAFG00000018208	ABCC1	ATP binding cassette subfamily C member 1 [Source:VGNC Symbol;Acc:VGNC:54275]
ENSCAFG00000009536	ABCC2	ATP binding cassette subfamily C member 2 [Source:VGNC Symbol;Acc:VGNC:37440]
ENSCAFG00000005433	ABCC4	ATP binding cassette subfamily C member 4 [Source:VGNC Symbol;Acc:VGNC:37441]
ENSCAFG00000012085	ABCC5	ATP binding cassette subfamily C member 5 [Source:VGNC Symbol;Acc:VGNC:37442]
ENSCAFG00000008779	ABCC8	ATP binding cassette subfamily C member 8 [Source:VGNC Symbol;Acc:VGNC:37443]
ENSCAFG00000012066	ABCC9	ATP binding cassette subfamily C member 9 [Source:VGNC Symbol;Acc:VGNC:37444]
ENSCAFG00000010285	ABCG1	ATP binding cassette subfamily G member 1 [Source:VGNC Symbol;Acc:VGNC:37452]
ENSCAFG00000004389	ABHD12	abhydrolase domain containing 12 [Source:VGNC Symbol;Acc:VGNC:37458]
ENSCAFG00000019757	ABO	histo-blood group ABO system transferase [Source:RefSeq peptide;Acc:NP_001271365]
ENSCAFG00000017996	ACACA	acetyl-CoA carboxylase alpha [Source:VGNC Symbol;Acc:VGNC:37489]
ENSCAFG00000016016	ACADVL	acyl-CoA dehydrogenase very long chain [Source:HGNC Symbol;Acc:HGNC:92]
ENSCAFG00000020352	ACD	ACD, shelterin complex subunit and telomerase recruitment factor [Source:VGNC Symbol;Acc:VGNC:37502]
ENSCAFG00000012112	ACE2	angiotensin I converting enzyme 2 [Source:VGNC Symbol;Acc:VGNC:37503]
ENSCAFG00000014054	ACHE	acetylcholinesterase (Cartwright blood group) [Source:HGNC Symbol;Acc:HGNC:108]
ENSCAFG00000012206	ACKR3	atypical chemokine receptor 3 [Source:VGNC Symbol;Acc:VGNC:37509]
ENSCAFG00000017319	ACP5	acid phosphatase 5, tartrate resistant [Source:VGNC Symbol;Acc:VGNC:37525]
ENSCAFG00000007662	ACSL1	acyl-CoA synthetase long chain family member 1 [Source:VGNC Symbol;Acc:VGNC:37532]
ENSCAFG00000018063	ACSL4	acyl-CoA synthetase long chain family member 4 [Source:VGNC Symbol;Acc:VGNC:37534]
ENSCAFG00000005820	ACSS3	acyl-CoA synthetase short chain family member 3 [Source:HGNC Symbol;Acc:HGNC:24723]
ENSCAFG00000008253	ACTA1	actin, alpha 1, skeletal muscle [Source:VGNC Symbol;Acc:VGNC:37538]
ENSCAFG00000015708	ACTA2	actin, alpha 2, smooth muscle, aorta [Source:VGNC Symbol;Acc:VGNC:37539]
ENSCAFG00000016020	ACTB	Actin, cytoplasmic 1 Actin, cytoplasmic 1, N-terminally processed [Source:UniProtKB/Swiss-Prot;Acc:O18840]
ENSCAFG00000012181	ACTC1	actin, alpha, cardiac muscle 1 [Source:VGNC Symbol;Acc:VGNC:37540]
ENSCAFG00000005734	ACTG1	actin, cytoplasmic 2 [Source:RefSeq peptide;Acc:NP_001003349]
ENSCAFG00000010822	ACTN2	actinin alpha 2 [Source:VGNC Symbol;Acc:VGNC:37549]
ENSCAFG00000009498	ADA	adenosine deaminase [Source:VGNC Symbol;Acc:VGNC:37568]
ENSCAFG00000016568	ADAM10	ADAM metallopeptidase domain 10 [Source:HGNC Symbol;Acc:HGNC:188]
ENSCAFG00000012986	ADAM12	ADAM metallopeptidase domain 12 [Source:VGNC Symbol;Acc:VGNC:37574]
ENSCAFG00000013414	ADAM23	ADAM metallopeptidase domain 23 [Source:VGNC Symbol;Acc:VGNC:37581]
ENSCAFG00000006234	ADAM33	ADAM metallopeptidase domain 33 [Source:VGNC Symbol;Acc:VGNC:37585]
ENSCAFG00000005847	ADAM9	ADAM metallopeptidase domain 9 [Source:VGNC Symbol;Acc:VGNC:37588]
ENSCAFG00000018557	ADAMTS10	ADAM metallopeptidase with thrombospondin type 1 motif 10 [Source:VGNC Symbol;Acc:VGNC:37591]
ENSCAFG00000019776	ADAMTS13	ADAM metallopeptidase with thrombospondin type 1 motif 13 [Source:VGNC Symbol;Acc:VGNC:37592]
ENSCAFG00000010709	ADAMTS17	ADAM metallopeptidase with thrombospondin type 1 motif 17 [Source:VGNC Symbol;Acc:VGNC:37595]
ENSCAFG00000006777	ADAMTS9	ADAM metallopeptidase with thrombospondin type 1 motif 9 [Source:VGNC Symbol;Acc:VGNC:37605]
ENSCAFG00000012044	ADAMTSL4	ADAMTS like 4 [Source:VGNC Symbol;Acc:VGNC:37608]
ENSCAFG00000012249	ADCY1	adenylate cyclase 1 [Source:VGNC Symbol;Acc:VGNC:37618]
ENSCAFG00000013694	ADIPOQ	adiponectin, C1Q and collagen domain containing [Source:VGNC Symbol;Acc:VGNC:37656]
ENSCAFG00000010368	ADIPOR1	adiponectin receptor 1 [Source:VGNC Symbol;Acc:VGNC:37657]
ENSCAFG00000015940	ADIPOR2	adiponectin receptor 2 [Source:VGNC Symbol;Acc:VGNC:37658]
ENSCAFG00000007539	ADM	adrenomedullin [Source:VGNC Symbol;Acc:VGNC:37660]
ENSCAFG00000011576	ADNP	activity dependent neuroprotector homeobox [Source:VGNC Symbol;Acc:VGNC:37662]
ENSCAFG00000010298	ADORA1	adenosine A1 receptor [Source:VGNC Symbol;Acc:VGNC:37665]
ENSCAFG00000013828	ADORA2A	adenosine A2a receptor [Source:VGNC Symbol;Acc:VGNC:37666]
ENSCAFG00000018079	ADORA2B	adenosine A2b receptor [Source:VGNC Symbol;Acc:VGNC:37667]
ENSCAFG00000010840	ADRA2A	adrenoceptor alpha 2A [Source:HGNC Symbol;Acc:HGNC:281]
ENSCAFG00000006805	ADRA2B	adrenoceptor alpha 2B [Source:VGNC Symbol;Acc:VGNC:37675]
ENSCAFG00000014602	ADRA2C	adrenoceptor alpha 2C [Source:HGNC Symbol;Acc:HGNC:283]
ENSCAFG00000011219	ADRB1	adrenoceptor beta 1 [Source:VGNC Symbol;Acc:VGNC:37676]
ENSCAFG00000018339	ADRB2	adrenoceptor beta 2 [Source:HGNC Symbol;Acc:HGNC:286]
ENSCAFG00000006161	ADRB3	Canis lupus familiaris adrenoceptor beta 3 (ADRB3), mRNA. [Source:RefSeq mRNA;Acc:NM_001003377]
ENSCAFG00000014453	AFAP1	actin filament associated protein 1 [Source:VGNC Symbol;Acc:VGNC:37683]
ENSCAFG00000011404	AGBL1	ATP/GTP binding protein like 1 [Source:HGNC Symbol;Acc:HGNC:26504]
ENSCAFG00000008342	AGBL2	ATP/GTP binding protein like 2 [Source:VGNC Symbol;Acc:VGNC:37696]
ENSCAFG00000000777	AGER	advanced glycosylation end-product specific receptor [Source:VGNC Symbol;Acc:VGNC:37699]
ENSCAFG00000003893	AGK	acylglycerol kinase [Source:VGNC Symbol;Acc:VGNC:37703]
ENSCAFG00000020040	AGL	amylo-alpha-1, 6-glucosidase, 4-alpha-glucanotransferase [Source:VGNC Symbol;Acc:VGNC:37704]
ENSCAFG00000019569	AGPAT2	1-acylglycerol-3-phosphate O-acyltransferase 2 [Source:VGNC Symbol;Acc:VGNC:37711]
ENSCAFG00000019342	AGRN	agrin [Source:VGNC Symbol;Acc:VGNC:37716]
ENSCAFG00000012068	AGT	angiotensinogen [Source:VGNC Symbol;Acc:VGNC:37718]
ENSCAFG00000008205	AGTR1	angiotensin II receptor type 1 [Source:VGNC Symbol;Acc:VGNC:37720]
ENSCAFG00000018264	AGTR2	angiotensin II receptor type 2 [Source:VGNC Symbol;Acc:VGNC:37721]
ENSCAFG00000018790	AGXT2	alanine--glyoxylate aminotransferase 2 [Source:HGNC Symbol;Acc:HGNC:14412]
ENSCAFG00000000234	AHI1	Abelson helper integration site 1 [Source:HGNC Symbol;Acc:HGNC:21575]
ENSCAFG00000013568	AHSG	alpha 2-HS glycoprotein [Source:VGNC Symbol;Acc:VGNC:37731]
ENSCAFG00000013897	AICDA	activation induced cytidine deaminase [Source:VGNC Symbol;Acc:VGNC:37733]
ENSCAFG00000018747	AIFM1	apoptosis inducing factor mitochondria associated 1 [Source:VGNC Symbol;Acc:VGNC:37737]
ENSCAFG00000015473	AIPL1	aryl hydrocarbon receptor interacting protein like 1 [Source:VGNC Symbol;Acc:VGNC:37742]
ENSCAFG00000010724	AIRE	autoimmune regulator [Source:VGNC Symbol;Acc:VGNC:37743]
ENSCAFG00000010390	AK2	adenylate kinase 2 [Source:VGNC Symbol;Acc:VGNC:37746]
ENSCAFG00000017744	AK7	adenylate kinase 7 [Source:VGNC Symbol;Acc:VGNC:37748]
ENSCAFG00000016026	AKAP5	A-kinase anchoring protein 5 [Source:VGNC Symbol;Acc:VGNC:37758]
ENSCAFG00000001935	AKAP9	A-kinase anchoring protein 9 [Source:VGNC Symbol;Acc:VGNC:37763]
ENSCAFG00000001290	AKR1B1	N/A
ENSCAFG00000018354	AKT1	AKT serine/threonine kinase 1 [Source:VGNC Symbol;Acc:VGNC:37770]
ENSCAFG00000005388	AKT2	AKT serine/threonine kinase 2 [Source:VGNC Symbol;Acc:VGNC:37772]
ENSCAFG00000003246	ALAD	aminolevulinate dehydratase [Source:VGNC Symbol;Acc:VGNC:37775]
ENSCAFG00000003016	ALB	albumin [Source:VGNC Symbol;Acc:VGNC:37778]
ENSCAFG00000001791	ALDH1A1	aldehyde dehydrogenase 1 family member A1 [Source:VGNC Symbol;Acc:VGNC:37782]
ENSCAFG00000016466	ALDH1A2	Canis lupus familiaris aldehyde dehydrogenase 1 family member A2 (ALDH1A2), mRNA. [Source:RefSeq mRNA;Acc:NM_001287089]
ENSCAFG00000010617	ALDH1A3	aldehyde dehydrogenase 1 family member A3 [Source:VGNC Symbol;Acc:VGNC:37784]
ENSCAFG00000018146	ALDH3A1	aldehyde dehydrogenase 3 family member A1 [Source:VGNC Symbol;Acc:VGNC:37786]
ENSCAFG00000002598	ALDOB	aldolase, fructose-bisphosphate B [Source:VGNC Symbol;Acc:VGNC:37792]
ENSCAFG00000008827	ALMS1	ALMS1, centrosome and basal body associated protein [Source:HGNC Symbol;Acc:HGNC:428]
ENSCAFG00000015949	ALOX15	arachidonate 15-lipoxygenase [Source:VGNC Symbol;Acc:VGNC:37811]
ENSCAFG00000006585	ALOX5AP	arachidonate 5-lipoxygenase activating protein [Source:HGNC Symbol;Acc:HGNC:436]
ENSCAFG00000011670	ALPK1	alpha kinase 1 [Source:VGNC Symbol;Acc:VGNC:37815]
ENSCAFG00000012927	ALPK3	alpha kinase 3 [Source:VGNC Symbol;Acc:VGNC:37817]
ENSCAFG00000014853	ALPL	alkaline phosphatase, liver/bone/kidney [Source:VGNC Symbol;Acc:VGNC:37818]
ENSCAFG00000005972	ALX1	ALX homeobox 1 [Source:VGNC Symbol;Acc:VGNC:37820]
ENSCAFG00000009193	AMBRA1	autophagy and beclin 1 regulator 1 [Source:VGNC Symbol;Acc:VGNC:37826]
ENSCAFG00000018090	AMMECR1	Alport syndrome, mental retardation, midface hypoplasia and elliptocytosis chromosomal region gene 1 [Source:HGNC Symbol;Acc:HGNC:467]
ENSCAFG00000008597	ANGPT2	angiopoietin 2 [Source:VGNC Symbol;Acc:VGNC:37855]
ENSCAFG00000018506	ANGPTL4	angiopoietin like 4 [Source:VGNC Symbol;Acc:VGNC:37860]
ENSCAFG00000016691	ANGPTL7	angiopoietin like 7 [Source:VGNC Symbol;Acc:VGNC:37863]
ENSCAFG00000017534	ANGPTL8	angiopoietin like 8 [Source:VGNC Symbol;Acc:VGNC:37864]
ENSCAFG00000011769	ANK2	ankyrin 2 [Source:HGNC Symbol;Acc:HGNC:493]
ENSCAFG00000014290	ANKH	ANKH inorganic pyrophosphate transport regulator [Source:HGNC Symbol;Acc:HGNC:15492]
ENSCAFG00000007247	ANKRD1	ankyrin repeat domain 1 [Source:VGNC Symbol;Acc:VGNC:37880]
ENSCAFG00000010053	ANO5	anoctamin 5 [Source:VGNC Symbol;Acc:VGNC:37928]
ENSCAFG00000017943	ANXA6	annexin A6 [Source:VGNC Symbol;Acc:VGNC:37943]
ENSCAFG00000014660	AOC3	amine oxidase, copper containing 3 [Source:VGNC Symbol;Acc:VGNC:37949]
ENSCAFG00000013900	AP1S1	adaptor related protein complex 1 sigma 1 subunit [Source:VGNC Symbol;Acc:VGNC:37956]
ENSCAFG00000007958	APLNR	apelin receptor [Source:VGNC Symbol;Acc:VGNC:37987]
ENSCAFG00000013320	APOA1	apolipoprotein A1 [Source:VGNC Symbol;Acc:VGNC:37991]
ENSCAFG00000012886	APOA2	apolipoprotein A2 [Source:VGNC Symbol;Acc:VGNC:37992]
ENSCAFG00000013327	APOA5	apolipoprotein A5 [Source:VGNC Symbol;Acc:VGNC:37993]
ENSCAFG00000003887	APOB	apolipoprotein B [Source:VGNC Symbol;Acc:VGNC:37994]
ENSCAFG00000004617	APOE	apolipoprotein E [Source:VGNC Symbol;Acc:VGNC:38002]
ENSCAFG00000000598	APOM	apolipoprotein M [Source:VGNC Symbol;Acc:VGNC:38008]
ENSCAFG00000030884	APOPT1	apoptogenic 1, mitochondrial [Source:HGNC Symbol;Acc:HGNC:20492]
ENSCAFG00000008557	APP	amyloid beta precursor protein [Source:VGNC Symbol;Acc:VGNC:38010]
ENSCAFG00000007952	APPL1	adaptor protein, phosphotyrosine interacting with PH domain and leucine zipper 1 [Source:VGNC Symbol;Acc:VGNC:38012]
ENSCAFG00000003102	AQP1	Aquaporin-1 [Source:UniProtKB/Swiss-Prot;Acc:Q9N2J4]
ENSCAFG00000028842	AQP2	Canis lupus familiaris aquaporin 2 (AQP2), mRNA. [Source:RefSeq mRNA;Acc:NM_001313833]
ENSCAFG00000018125	AQP4	aquaporin 4 [Source:VGNC Symbol;Acc:VGNC:38018]
ENSCAFG00000016556	AQP9	aquaporin 9 [Source:VGNC Symbol;Acc:VGNC:38021]
ENSCAFG00000016656	AR	androgen receptor [Source:VGNC Symbol;Acc:VGNC:38023]
ENSCAFG00000005677	ARAP1	ArfGAP with RhoGAP domain, ankyrin repeat and PH domain 1 [Source:VGNC Symbol;Acc:VGNC:38025]
ENSCAFG00000000386	ARG1	arginase 1 [Source:VGNC Symbol;Acc:VGNC:38041]
ENSCAFG00000016428	ARG2	arginase 2 [Source:VGNC Symbol;Acc:VGNC:38042]
ENSCAFG00000018785	ARHGAP36	Rho GTPase activating protein 36 [Source:VGNC Symbol;Acc:VGNC:38061]
ENSCAFG00000011595	ARHGAP6	Rho GTPase activating protein 6 [Source:VGNC Symbol;Acc:VGNC:38068]
ENSCAFG00000013667	ARHGEF10	Rho guanine nucleotide exchange factor 10 [Source:VGNC Symbol;Acc:VGNC:38072]
ENSCAFG00000016484	ARHGEF11	Rho guanine nucleotide exchange factor 11 [Source:VGNC Symbol;Acc:VGNC:38074]
ENSCAFG00000011934	ARHGEF12	Rho guanine nucleotide exchange factor 12 [Source:VGNC Symbol;Acc:VGNC:38075]
ENSCAFG00000009111	ARL6	ADP ribosylation factor like GTPase 6 [Source:VGNC Symbol;Acc:VGNC:38118]
ENSCAFG00000008095	ARNTL	aryl hydrocarbon receptor nuclear translocator like [Source:HGNC Symbol;Acc:HGNC:701]
ENSCAFG00000013341	ARPC5	actin related protein 2/3 complex subunit 5 [Source:HGNC Symbol;Acc:HGNC:708]
ENSCAFG00000000566	ARSA	arylsulfatase A precursor [Source:RefSeq peptide;Acc:NP_001041548]
ENSCAFG00000011070	ARSG	Arylsulfatase G [Source:VGNC Symbol;Acc:VGNC:51920]
ENSCAFG00000004801	ASB10	ankyrin repeat and SOCS box containing 10 [Source:VGNC Symbol;Acc:VGNC:38155]
ENSCAFG00000017612	ASB2	ankyrin repeat and SOCS box containing 2 [Source:VGNC Symbol;Acc:VGNC:38163]
ENSCAFG00000018352	ASIC2	acid sensing ion channel subunit 2 [Source:VGNC Symbol;Acc:VGNC:38178]
ENSCAFG00000002307	ASPN	asporin [Source:VGNC Symbol;Acc:VGNC:38190]
ENSCAFG00000001324	ATF4	activating transcription factor 4 [Source:VGNC Symbol;Acc:VGNC:38210]
ENSCAFG00000009170	ATG13	autophagy related 13 [Source:VGNC Symbol;Acc:VGNC:38217]
ENSCAFG00000014460	ATL1	atlastin GTPase 1 [Source:VGNC Symbol;Acc:VGNC:38230]
ENSCAFG00000014454	ATM	ATM serine/threonine kinase [Source:VGNC Symbol;Acc:VGNC:38233]
ENSCAFG00000010016	ATOH1	atonal bHLH transcription factor 1 [Source:VGNC Symbol;Acc:VGNC:38235]
ENSCAFG00000013555	ATOH7	atonal bHLH transcription factor 7 [Source:VGNC Symbol;Acc:VGNC:38236]
ENSCAFG00000015840	ATP13A2	ATPase cation transporting 13A2 [Source:VGNC Symbol;Acc:VGNC:38242]
ENSCAFG00000015258	ATP1B1	ATPase Na+/K+ transporting subunit beta 1 [Source:VGNC Symbol;Acc:VGNC:38248]
ENSCAFG00000016703	ATP1B2	ATPase Na+/K+ transporting subunit beta 2 [Source:VGNC Symbol;Acc:VGNC:38249]
ENSCAFG00000007731	ATP1B3	ATPase Na+/K+ transporting subunit beta 3 [Source:VGNC Symbol;Acc:VGNC:38250]
ENSCAFG00000018484	ATP1B4	ATPase Na+/K+ transporting family member beta 4 [Source:VGNC Symbol;Acc:VGNC:38251]
ENSCAFG00000008434	ATP2A2	ATPase sarcoplasmic/endoplasmic reticulum Ca2+ transporting 2 [Source:VGNC Symbol;Acc:VGNC:38254]
ENSCAFG00000013971	ATP2A3	ATPase sarcoplasmic/endoplasmic reticulum Ca2+ transporting 3 [Source:VGNC Symbol;Acc:VGNC:38255]
ENSCAFG00000005076	ATP2B2	ATPase plasma membrane Ca2+ transporting 2 [Source:VGNC Symbol;Acc:VGNC:38257]
ENSCAFG00000006390	ATP4B	ATPase H+/K+ transporting beta subunit [Source:VGNC Symbol;Acc:VGNC:38263]
ENSCAFG00000000136	ATP5B	N/A
ENSCAFG00000003442	ATP6V1B1	ATPase H+ transporting V1 subunit B1 [Source:HGNC Symbol;Acc:HGNC:853]
ENSCAFG00000010095	ATP6V1B2	ATPase H+ transporting V1 subunit B2 [Source:VGNC Symbol;Acc:VGNC:38277]
ENSCAFG00000017263	ATP7A	ATPase copper transporting alpha [Source:VGNC Symbol;Acc:VGNC:38285]
ENSCAFG00000000123	ATP8B1	ATPase phospholipid transporting 8B1 [Source:VGNC Symbol;Acc:VGNC:38288]
ENSCAFG00000008606	ATXN2	ataxin 2 [Source:VGNC Symbol;Acc:VGNC:38301]
ENSCAFG00000006432	AVP	arginine vasopressin [Source:VGNC Symbol;Acc:VGNC:38317]
ENSCAFG00000010214	AVPR1B	arginine vasopressin receptor 1B [Source:VGNC Symbol;Acc:VGNC:38319]
ENSCAFG00000005041	AXL	AXL receptor tyrosine kinase [Source:VGNC Symbol;Acc:VGNC:38326]
ENSCAFG00000013633	B2M	beta-2-microglobulin [Source:VGNC Symbol;Acc:VGNC:38331]
ENSCAFG00000011268	B3GALNT2	beta-1,3-N-acetylgalactosaminyltransferase 2 [Source:VGNC Symbol;Acc:VGNC:38332]
ENSCAFG00000015783	B3GAT3	beta-1,3-glucuronyltransferase 3 [Source:VGNC Symbol;Acc:VGNC:38339]
ENSCAFG00000006522	B3GLCT	beta 3-glucosyltransferase [Source:VGNC Symbol;Acc:VGNC:38340]
ENSCAFG00000016916	B4GALNT2	beta-1,4-N-acetyl-galactosaminyltransferase 2 [Source:VGNC Symbol;Acc:VGNC:38346]
ENSCAFG00000031128	B4GALT3	beta-1,4-galactosyltransferase 3 [Source:VGNC Symbol;Acc:VGNC:38351]
ENSCAFG00000012776	B4GAT1	beta-1,4-glucuronyltransferase 1 [Source:VGNC Symbol;Acc:VGNC:38355]
ENSCAFG00000012199	BAG3	BCL2 associated athanogene 3 [Source:VGNC Symbol;Acc:VGNC:38365]
ENSCAFG00000001022	BAK1	BCL2 antagonist/killer 1 [Source:VGNC Symbol;Acc:VGNC:38375]
ENSCAFG00000019892	BARHL1	BarH like homeobox 1 [Source:VGNC Symbol;Acc:VGNC:38380]
ENSCAFG00000003867	BAX	BCL2 associated X, apoptosis regulator [Source:VGNC Symbol;Acc:VGNC:38388]
ENSCAFG00000014473	BCHE	butyrylcholinesterase [Source:VGNC Symbol;Acc:VGNC:38405]
ENSCAFG00000017809	BCL11B	B-cell CLL/lymphoma 11B [Source:HGNC Symbol;Acc:HGNC:13222]
ENSCAFG00000000068	BCL2	apoptosis regulator Bcl-2 [Source:RefSeq peptide;Acc:NP_001002949]
ENSCAFG00000007053	BCL2L1	BCL2 like 1 [Source:VGNC Symbol;Acc:VGNC:38408]
ENSCAFG00000030412	BCL2L11	BCL2 like 11 [Source:HGNC Symbol;Acc:HGNC:994]
ENSCAFG00000000245	BCLAF1	BCL2 associated transcription factor 1 [Source:VGNC Symbol;Acc:VGNC:38415]
ENSCAFG00000014099	BCOR	BCL6 corepressor [Source:HGNC Symbol;Acc:HGNC:20893]
ENSCAFG00000014876	BCS1L	BCS1 homolog, ubiquinol-cytochrome c reductase complex chaperone [Source:VGNC Symbol;Acc:VGNC:38421]
ENSCAFG00000013354	BDH1	3-hydroxybutyrate dehydrogenase 1 [Source:VGNC Symbol;Acc:VGNC:38422]
ENSCAFG00000010207	BDNF	brain derived neurotrophic factor [Source:HGNC Symbol;Acc:HGNC:1033]
ENSCAFG00000015909	BEST1	bestrophin 1 [Source:VGNC Symbol;Acc:VGNC:38434]
ENSCAFG00000017200	BEST2	bestrophin 2 [Source:VGNC Symbol;Acc:VGNC:38435]
ENSCAFG00000005485	BFSP1	beaded filament structural protein 1 [Source:VGNC Symbol;Acc:VGNC:38440]
ENSCAFG00000006428	BFSP2	beaded filament structural protein 2 [Source:VGNC Symbol;Acc:VGNC:38441]
ENSCAFG00000028647	BGLAP	bone gamma-carboxyglutamate protein [Source:VGNC Symbol;Acc:VGNC:38442]
ENSCAFG00000002289	BICD2	BICD cargo adaptor 2 [Source:VGNC Symbol;Acc:VGNC:38451]
ENSCAFG00000004606	BIN1	bridging integrator 1 [Source:VGNC Symbol;Acc:VGNC:38458]
ENSCAFG00000005302	BIRC5	baculoviral IAP repeat containing 5 [Source:VGNC Symbol;Acc:VGNC:38461]
ENSCAFG00000005775	BIRC6	baculoviral IAP repeat containing 6 [Source:VGNC Symbol;Acc:VGNC:38462]
ENSCAFG00000012385	BLM	Bloom syndrome RecQ like helicase [Source:HGNC Symbol;Acc:HGNC:1058]
ENSCAFG00000031497	BMP2	bone morphogenetic protein 2 [Source:VGNC Symbol;Acc:VGNC:38478]
ENSCAFG00000014880	BMP4	bone morphogenetic protein 4 [Source:VGNC Symbol;Acc:VGNC:38480]
ENSCAFG00000032289	BMP6	bone morphogenetic protein 6 [Source:HGNC Symbol;Acc:HGNC:1073]
ENSCAFG00000012011	BMP7	bone morphogenetic protein 7 [Source:VGNC Symbol;Acc:VGNC:38482]
ENSCAFG00000003907	BRAF	B-Raf proto-oncogene, serine/threonine kinase [Source:VGNC Symbol;Acc:VGNC:38514]
ENSCAFG00000008615	BRAP	BRCA1 associated protein [Source:VGNC Symbol;Acc:VGNC:38515]
ENSCAFG00000014600	BRCA1	BRCA1, DNA repair associated [Source:VGNC Symbol;Acc:VGNC:38516]
ENSCAFG00000006383	BRCA2	BRCA2, DNA repair associated [Source:VGNC Symbol;Acc:VGNC:38517]
ENSCAFG00000000871	BRD2	bromodomain containing 2 [Source:VGNC Symbol;Acc:VGNC:38519]
ENSCAFG00000023629	BSCL2	BSCL2, seipin lipid droplet biogenesis associated [Source:VGNC Symbol;Acc:VGNC:38538]
ENSCAFG00000018989	BSND	barttin CLCNK type accessory beta subunit [Source:VGNC Symbol;Acc:VGNC:38540]
ENSCAFG00000009013	BTC	betacellulin [Source:VGNC Symbol;Acc:VGNC:38555]
ENSCAFG00000000797	BTNL2	butyrophilin like 2 [Source:HGNC Symbol;Acc:HGNC:1142]
ENSCAFG00000003600	BVES	blood vessel epicardial substance [Source:VGNC Symbol;Acc:VGNC:38569]
ENSCAFG00000014477	C12ORF57	chromosome 12 open reading frame 57 [Source:HGNC Symbol;Acc:HGNC:29521]
ENSCAFG00000031290	C1QA	complement C1q A chain [Source:VGNC Symbol;Acc:VGNC:38576]
ENSCAFG00000019316	C1QTNF12	C1q and TNF related 12 [Source:VGNC Symbol;Acc:VGNC:38582]
ENSCAFG00000032120	C1QTNF6	C1q and TNF related 6 [Source:VGNC Symbol;Acc:VGNC:38584]
ENSCAFG00000018625	C3	complement C3 [Source:VGNC Symbol;Acc:VGNC:38591]
ENSCAFG00000025436	C3AR1	complement C3a receptor 1 [Source:VGNC Symbol;Acc:VGNC:38592]
ENSCAFG00000003591	C5	complement C5 [Source:VGNC Symbol;Acc:VGNC:38595]
ENSCAFG00000004173	C5AR2	complement component 5a receptor 2 [Source:VGNC Symbol;Acc:VGNC:38597]
ENSCAFG00000000472	C6ORF15	chromosome 6 open reading frame 15 [Source:HGNC Symbol;Acc:HGNC:13927]
ENSCAFG00000016990	CA12	carbonic anhydrase 12 [Source:VGNC Symbol;Acc:VGNC:38607]
ENSCAFG00000010732	CAB39	calcium binding protein 39 [Source:VGNC Symbol;Acc:VGNC:38619]
ENSCAFG00000011363	CABP2	calcium binding protein 2 [Source:VGNC Symbol;Acc:VGNC:38624]
ENSCAFG00000016897	CACNA1A	calcium voltage-gated channel subunit alpha1 A [Source:VGNC Symbol;Acc:VGNC:38631]
ENSCAFG00000019380	CACNA1B	calcium voltage-gated channel subunit alpha1 B [Source:VGNC Symbol;Acc:VGNC:38632]
ENSCAFG00000016051	CACNA1C	calcium voltage-gated channel subunit alpha1 C [Source:VGNC Symbol;Acc:VGNC:38633]
ENSCAFG00000008525	CACNA1D	calcium voltage-gated channel subunit alpha1 D [Source:VGNC Symbol;Acc:VGNC:38634]
ENSCAFG00000017120	CACNA1G	calcium voltage-gated channel subunit alpha1 G [Source:VGNC Symbol;Acc:VGNC:38637]
ENSCAFG00000019596	CACNA1H	calcium voltage-gated channel subunit alpha1 H [Source:VGNC Symbol;Acc:VGNC:38638]
ENSCAFG00000001314	CACNA1I	calcium voltage-gated channel subunit alpha1 I [Source:VGNC Symbol;Acc:VGNC:38639]
ENSCAFG00000004474	CACNB2	calcium voltage-gated channel auxiliary subunit beta 2 [Source:VGNC Symbol;Acc:VGNC:38645]
ENSCAFG00000032667	CACNG8	calcium voltage-gated channel auxiliary subunit gamma 8 [Source:VGNC Symbol;Acc:VGNC:38652]
ENSCAFG00000009015	CALB1	calbindin 1 [Source:VGNC Symbol;Acc:VGNC:38660]
ENSCAFG00000020177	CALB2	calbindin 2 [Source:VGNC Symbol;Acc:VGNC:38661]
ENSCAFG00000014737	CALCRL	calcitonin receptor like receptor [Source:VGNC Symbol;Acc:VGNC:38665]
ENSCAFG00000017093	CALR	calreticulin [Source:HGNC Symbol;Acc:HGNC:1455]
ENSCAFG00000015694	CALR3	calreticulin 3 [Source:VGNC Symbol;Acc:VGNC:38675]
ENSCAFG00000018163	CAMK2A	calcium/calmodulin dependent protein kinase II alpha [Source:VGNC Symbol;Acc:VGNC:38680]
ENSCAFG00000029693	CAMLG	calcium modulating ligand [Source:VGNC Symbol;Acc:VGNC:38687]
ENSCAFG00000012896	CAMP	cathelicidin antimicrobial peptide [Source:VGNC Symbol;Acc:VGNC:38688]
ENSCAFG00000013830	CAPN1	calpain 1 [Source:VGNC Symbol;Acc:VGNC:38698]
ENSCAFG00000012695	CAPN10	calpain 10 [Source:VGNC Symbol;Acc:VGNC:38699]
ENSCAFG00000016416	CAPN2	calpain 2 [Source:HGNC Symbol;Acc:HGNC:1479]
ENSCAFG00000010383	CAPN3	calpain 3 [Source:VGNC Symbol;Acc:VGNC:38704]
ENSCAFG00000016284	CARD11	caspase recruitment domain family member 11 [Source:VGNC Symbol;Acc:VGNC:38714]
ENSCAFG00000031950	CARTPT	CART prepropeptide [Source:VGNC Symbol;Acc:VGNC:38727]
ENSCAFG00000014358	CASK	calcium/calmodulin dependent serine protein kinase [Source:VGNC Symbol;Acc:VGNC:38729]
ENSCAFG00000014864	CASP12	caspase-12 [Source:RefSeq peptide;Acc:NP_001070704]
ENSCAFG00000007750	CASP3	caspase 3 [Source:VGNC Symbol;Acc:VGNC:38734]
ENSCAFG00000014860	CASP4	caspase-1 [Source:RefSeq peptide;Acc:NP_001003125]
ENSCAFG00000025192	CASP8	caspase 8 [Source:VGNC Symbol;Acc:VGNC:38736]
ENSCAFG00000016279	CASP9	caspase 9 [Source:HGNC Symbol;Acc:HGNC:1511]
ENSCAFG00000012470	CASQ1	calsequestrin 1 [Source:VGNC Symbol;Acc:VGNC:38738]
ENSCAFG00000011790	CASR	calcium sensing receptor [Source:VGNC Symbol;Acc:VGNC:38740]
ENSCAFG00000016771	CASZ1	castor zinc finger 1 [Source:HGNC Symbol;Acc:HGNC:26002]
ENSCAFG00000006941	CAT	Catalase [Source:UniProtKB/Swiss-Prot;Acc:O97492]
ENSCAFG00000013070	CATSPER1	cation channel sperm associated 1 [Source:VGNC Symbol;Acc:VGNC:38744]
ENSCAFG00000013189	CATSPER2	cation channel sperm associated 2 [Source:VGNC Symbol;Acc:VGNC:38745]
ENSCAFG00000003404	CAV1	caveolin 1 [Source:VGNC Symbol;Acc:VGNC:38751]
ENSCAFG00000003402	CAV2	caveolin 2 [Source:VGNC Symbol;Acc:VGNC:38752]
ENSCAFG00000005557	CAV3	caveolin 3 [Source:VGNC Symbol;Acc:VGNC:38753]
ENSCAFG00000028879	CAVIN1	caveolae associated protein 1 [Source:VGNC Symbol;Acc:VGNC:38754]
ENSCAFG00000002581	CAVIN4	caveolae associated protein 4 [Source:VGNC Symbol;Acc:VGNC:38756]
ENSCAFG00000032247	CBD103	N/A
ENSCAFG00000012100	CBL	Cbl proto-oncogene [Source:VGNC Symbol;Acc:VGNC:38758]
ENSCAFG00000009793	CBLB	Cbl proto-oncogene B [Source:VGNC Symbol;Acc:VGNC:38759]
ENSCAFG00000010008	CBLN1	cerebellin 1 precursor [Source:VGNC Symbol;Acc:VGNC:38761]
ENSCAFG00000009285	CCAR2	cell cycle and apoptosis regulator 2 [Source:VGNC Symbol;Acc:VGNC:38774]
ENSCAFG00000008709	CCDC102A	coiled-coil domain containing 102A [Source:HGNC Symbol;Acc:HGNC:28097]
ENSCAFG00000004036	CCDC114	coiled-coil domain containing 114 [Source:VGNC Symbol;Acc:VGNC:38783]
ENSCAFG00000017400	CCDC151	coiled-coil domain containing 151 [Source:VGNC Symbol;Acc:VGNC:38801]
ENSCAFG00000011540	CCDC39	coiled-coil domain containing 39 [Source:HGNC Symbol;Acc:HGNC:25244]
ENSCAFG00000005580	CCDC40	coiled-coil domain containing 40 [Source:VGNC Symbol;Acc:VGNC:38837]
ENSCAFG00000014058	CCDC50	coiled-coil domain containing 50 [Source:VGNC Symbol;Acc:VGNC:38840]
ENSCAFG00000008801	CCDC65	coiled-coil domain containing 65 [Source:VGNC Symbol;Acc:VGNC:38849]
ENSCAFG00000008112	CCDC66	coiled-coil domain containing 66 [Source:VGNC Symbol;Acc:VGNC:38850]
ENSCAFG00000019621	CCDC78	coiled-coil domain containing 78 [Source:VGNC Symbol;Acc:VGNC:38856]
ENSCAFG00000008754	CCL17	C-C motif chemokine ligand 17 [Source:VGNC Symbol;Acc:VGNC:38882]
ENSCAFG00000001954	CCL19	C-C motif chemokine ligand 19 [Source:VGNC Symbol;Acc:VGNC:38883]
ENSCAFG00000018349	CCL2	C-C motif chemokine ligand 2 [Source:HGNC Symbol;Acc:HGNC:10618]
ENSCAFG00000032287	CCL22	C-C motif chemokine ligand 22 [Source:VGNC Symbol;Acc:VGNC:38885]
ENSCAFG00000013396	CCL24	C-C motif chemokine ligand 24 [Source:VGNC Symbol;Acc:VGNC:38886]
ENSCAFG00000032573	CCL26	C-C motif chemokine ligand 26 [Source:VGNC Symbol;Acc:VGNC:38888]
ENSCAFG00000001953	CCL27	C-C motif chemokine ligand 27 [Source:VGNC Symbol;Acc:VGNC:38889]
ENSCAFG00000018167	CCL3	N/A
ENSCAFG00000018171	CCL5	C-C motif chemokine ligand 5 [Source:HGNC Symbol;Acc:HGNC:10632]
ENSCAFG00000010700	CCND1	G1/S-specific cyclin-D1 [Source:RefSeq peptide;Acc:NP_001005757]
ENSCAFG00000006753	CCNO	cyclin O [Source:HGNC Symbol;Acc:HGNC:18576]
ENSCAFG00000013786	CCR2	C-C motif chemokine receptor 2 [Source:HGNC Symbol;Acc:HGNC:1603]
ENSCAFG00000013794	CCR3	C-C motif chemokine receptor 3 [Source:VGNC Symbol;Acc:VGNC:38912]
ENSCAFG00000004658	CCR4	C-C motif chemokine receptor 4 [Source:VGNC Symbol;Acc:VGNC:38913]
ENSCAFG00000013783	CCR5	C-C chemokine receptor type 5 [Source:UniProtKB/Swiss-Prot;Acc:Q5ECR9]
ENSCAFG00000030966	CCR6	C-C motif chemokine receptor 6 [Source:VGNC Symbol;Acc:VGNC:38914]
ENSCAFG00000010084	CCT5	chaperonin containing TCP1 subunit 5 [Source:VGNC Symbol;Acc:VGNC:38925]
ENSCAFG00000023924	CD151	CD151 molecule (Raph blood group) [Source:HGNC Symbol;Acc:HGNC:1630]
ENSCAFG00000012876	CD152	cytotoxic T-lymphocyte associated protein 4 [Source:HGNC Symbol;Acc:HGNC:2505]
ENSCAFG00000013968	CD163	CD163 molecule [Source:VGNC Symbol;Acc:VGNC:38931]
ENSCAFG00000029011	CD164	CD164 molecule [Source:VGNC Symbol;Acc:VGNC:38932]
ENSCAFG00000012872	CD28	CD28 molecule [Source:VGNC Symbol;Acc:VGNC:38944]
ENSCAFG00000011722	CD34	CD34 molecule [Source:VGNC Symbol;Acc:VGNC:38950]
ENSCAFG00000006401	CD36	CD36 molecule [Source:VGNC Symbol;Acc:VGNC:38951]
ENSCAFG00000009994	CD40	CD40 molecule [Source:VGNC Symbol;Acc:VGNC:38958]
ENSCAFG00000018945	CD40LG	CD40 ligand [Source:VGNC Symbol;Acc:VGNC:38959]
ENSCAFG00000006889	CD44	CD44 molecule (Indian blood group) [Source:HGNC Symbol;Acc:HGNC:1681]
ENSCAFG00000013596	CD69	CD69 molecule [Source:VGNC Symbol;Acc:VGNC:38968]
ENSCAFG00000004980	CD79A	CD79a molecule [Source:VGNC Symbol;Acc:VGNC:38973]
ENSCAFG00000020007	CDC14A	cell division cycle 14A [Source:VGNC Symbol;Acc:VGNC:38986]
ENSCAFG00000020182	CDC7	cell division cycle 7 [Source:VGNC Symbol;Acc:VGNC:39010]
ENSCAFG00000020305	CDH1	Cadherin-1 E-Cad/CTF1 E-Cad/CTF2 E-Cad/CTF3 [Source:UniProtKB/Swiss-Prot;Acc:F1PAA9]
ENSCAFG00000019974	CDH13	cadherin 13 [Source:VGNC Symbol;Acc:VGNC:39022]
ENSCAFG00000018115	CDH2	cadherin 2 [Source:VGNC Symbol;Acc:VGNC:39028]
ENSCAFG00000020413	CDH5	cadherin 5 [Source:VGNC Symbol;Acc:VGNC:39033]
ENSCAFG00000004725	CDK5	cyclin dependent kinase 5 [Source:HGNC Symbol;Acc:HGNC:1774]
ENSCAFG00000018375	CDK5R1	cyclin dependent kinase 5 regulatory subunit 1 [Source:VGNC Symbol;Acc:VGNC:39055]
ENSCAFG00000010226	CDKAL1	CDK5 regulatory subunit associated protein 1 like 1 [Source:VGNC Symbol;Acc:VGNC:39063]
ENSCAFG00000029853	CDKN1A	cyclin dependent kinase inhibitor 1A [Source:VGNC Symbol;Acc:VGNC:39068]
ENSCAFG00000013244	CDKN1B	cyclin dependent kinase inhibitor 1B [Source:VGNC Symbol;Acc:VGNC:39069]
ENSCAFG00000001680	CDKN2B	N/A
ENSCAFG00000004660	CEACAM16	Canis lupus familiaris carcinoembryonic antigen related cell adhesion molecule 16 (CEACAM16), mRNA. [Source:RefSeq mRNA;Acc:NM_001286998]
ENSCAFG00000031326	CEBPB	CCAAT/enhancer binding protein beta [Source:HGNC Symbol;Acc:HGNC:1834]
ENSCAFG00000001577	CEP78	centrosomal protein 78 [Source:VGNC Symbol;Acc:VGNC:39138]
ENSCAFG00000004880	CFAP221	cilia and flagella associated protein 221 [Source:VGNC Symbol;Acc:VGNC:39160]
ENSCAFG00000032562	CFL2	cofilin 2 [Source:VGNC Symbol;Acc:VGNC:39177]
ENSCAFG00000012130	CFLAR	CASP8 and FADD like apoptosis regulator [Source:VGNC Symbol;Acc:VGNC:39178]
ENSCAFG00000003429	CFTR	cystic fibrosis transmembrane conductance regulator [Source:VGNC Symbol;Acc:VGNC:39180]
ENSCAFG00000003040	CGA	glycoprotein hormones, alpha polypeptide [Source:VGNC Symbol;Acc:VGNC:39181]
ENSCAFG00000006672	CHAT	choline O-acetyltransferase [Source:VGNC Symbol;Acc:VGNC:39192]
ENSCAFG00000007167	CHD7	chromodomain helicase DNA binding protein 7 [Source:VGNC Symbol;Acc:VGNC:39205]
ENSCAFG00000010274	CHI3L1	chitinase 3 like 1 [Source:VGNC Symbol;Acc:VGNC:39213]
ENSCAFG00000006248	CHL1	cell adhesion molecule L1 like [Source:VGNC Symbol;Acc:VGNC:39219]
ENSCAFG00000007478	CHMP4B	charged multivesicular body protein 4B [Source:HGNC Symbol;Acc:HGNC:16171]
ENSCAFG00000003363	CHRM2	cholinergic receptor muscarinic 2 [Source:VGNC Symbol;Acc:VGNC:39232]
ENSCAFG00000013283	CHRNA1	cholinergic receptor nicotinic alpha 1 subunit [Source:VGNC Symbol;Acc:VGNC:39236]
ENSCAFG00000012893	CHRNA4	cholinergic receptor nicotinic alpha 4 subunit [Source:VGNC Symbol;Acc:VGNC:39239]
ENSCAFG00000005444	CHRNA6	cholinergic receptor nicotinic alpha 6 subunit [Source:VGNC Symbol;Acc:VGNC:39240]
ENSCAFG00000016315	CHRNB1	cholinergic receptor nicotinic beta 1 subunit [Source:VGNC Symbol;Acc:VGNC:39242]
ENSCAFG00000011283	CHRND	cholinergic receptor nicotinic delta subunit [Source:VGNC Symbol;Acc:VGNC:39246]
ENSCAFG00000015838	CHRNE	cholinergic receptor nicotinic epsilon subunit [Source:VGNC Symbol;Acc:VGNC:39247]
ENSCAFG00000014410	CHST3	carbohydrate sulfotransferase 3 [Source:VGNC Symbol;Acc:VGNC:39255]
ENSCAFG00000031428	CIB2	calcium and integrin binding family member 2 [Source:VGNC Symbol;Acc:VGNC:39267]
ENSCAFG00000000285	CITED2	Cbp/p300 interacting transactivator with Glu/Asp rich carboxy-terminal domain 2 [Source:VGNC Symbol;Acc:VGNC:39284]
ENSCAFG00000009053	CKAP5	cytoskeleton associated protein 5 [Source:VGNC Symbol;Acc:VGNC:39289]
ENSCAFG00000012764	CLCN2	chloride voltage-gated channel 2 [Source:VGNC Symbol;Acc:VGNC:39302]
ENSCAFG00000007669	CLCN3	Canis lupus familiaris chloride voltage-gated channel 3 (CLCN3), transcript variant 1, mRNA. [Source:RefSeq mRNA;Acc:NM_001308463]
ENSCAFG00000016542	CLCN6	chloride voltage-gated channel 6 [Source:VGNC Symbol;Acc:VGNC:39306]
ENSCAFG00000019565	CLCN7	chloride voltage-gated channel 7 [Source:VGNC Symbol;Acc:VGNC:39307]
ENSCAFG00000029313	CLDN1	claudin 1 [Source:VGNC Symbol;Acc:VGNC:39308]
ENSCAFG00000014851	CLDN11	claudin 11 [Source:HGNC Symbol;Acc:HGNC:8514]
ENSCAFG00000009679	CLDN14	claudin 14 [Source:VGNC Symbol;Acc:VGNC:39311]
ENSCAFG00000031946	CLDN2	claudin 2 [Source:VGNC Symbol;Acc:VGNC:39316]
ENSCAFG00000024263	CLDN9	claudin 9 [Source:VGNC Symbol;Acc:VGNC:39323]
ENSCAFG00000018920	CLEC16A	C-type lectin domain containing 16A [Source:VGNC Symbol;Acc:VGNC:39328]
ENSCAFG00000029471	CLIC2	chloride intracellular channel 2 [Source:VGNC Symbol;Acc:VGNC:39338]
ENSCAFG00000002016	CLIC5	chloride intracellular channel 5 [Source:VGNC Symbol;Acc:VGNC:39341]
ENSCAFG00000017139	CLN3	N/A
ENSCAFG00000005071	CLN5	Ceroid-lipofuscinosis neuronal protein 5 Ceroid-lipofuscinosis neuronal protein 5, secreted form [Source:UniProtKB/Swiss-Prot;Acc:Q5JZQ9]
ENSCAFG00000017473	CLN6	CLN6, transmembrane ER protein [Source:VGNC Symbol;Acc:VGNC:39351]
ENSCAFG00000016330	CLN8	Protein CLN8 [Source:UniProtKB/Swiss-Prot;Acc:Q5JZQ7]
ENSCAFG00000002140	CLOCK	clock circadian regulator [Source:VGNC Symbol;Acc:VGNC:39353]
ENSCAFG00000005720	CLPB	ClpB homolog, mitochondrial AAA ATPase chaperonin [Source:VGNC Symbol;Acc:VGNC:39355]
ENSCAFG00000008447	CLRN1	clarin 1 [Source:HGNC Symbol;Acc:HGNC:12605]
ENSCAFG00000008404	CLU	clusterin [Source:VGNC Symbol;Acc:VGNC:39369]
ENSCAFG00000019997	CMIP	c-Maf inducing protein [Source:HGNC Symbol;Acc:HGNC:24319]
ENSCAFG00000011383	CMKLR1	chemerin chemokine-like receptor 1 [Source:VGNC Symbol;Acc:VGNC:39378]
ENSCAFG00000004320	CNBP	CCHC-type zinc finger nucleic acid binding protein [Source:VGNC Symbol;Acc:VGNC:39390]
ENSCAFG00000001917	CNGA1	Cyclic nucleotide gated channel alpha 1 [Source:VGNC Symbol;Acc:VGNC:39395]
ENSCAFG00000008588	CNGB1	Cyclic nucleotide gated channel beta 1 [Source:VGNC Symbol;Acc:VGNC:52122]
ENSCAFG00000003085	CNR1	cannabinoid receptor 1 [Source:VGNC Symbol;Acc:VGNC:39426]
ENSCAFG00000013071	CNR2	Canis lupus familiaris cannabinoid receptor 2 (CNR2), mRNA. [Source:RefSeq mRNA;Acc:NM_001284480]
ENSCAFG00000009872	CNTN1	contactin 1 [Source:VGNC Symbol;Acc:VGNC:39432]
ENSCAFG00000020059	CNTNAP4	contactin associated protein like 4 [Source:VGNC Symbol;Acc:VGNC:39439]
ENSCAFG00000002329	COA5	cytochrome c oxidase assembly factor 5 [Source:VGNC Symbol;Acc:VGNC:39443]
ENSCAFG00000030004	COA7	cytochrome c oxidase assembly factor 7 (putative) [Source:HGNC Symbol;Acc:HGNC:25716]
ENSCAFG00000012762	COCH	cochlin [Source:VGNC Symbol;Acc:VGNC:39447]
ENSCAFG00000019985	COL11A1	collagen type XI alpha 1 chain [Source:VGNC Symbol;Acc:VGNC:39456]
ENSCAFG00000000903	COL11A2	collagen type XI alpha 2 chain [Source:VGNC Symbol;Acc:VGNC:39457]
ENSCAFG00000002702	COL12A1	collagen type XII alpha 1 chain [Source:VGNC Symbol;Acc:VGNC:39458]
ENSCAFG00000013983	COL13A1	collagen type XIII alpha 1 chain [Source:VGNC Symbol;Acc:VGNC:39459]
ENSCAFG00000010547	COL17A1	collagen type XVII alpha 1 chain [Source:VGNC Symbol;Acc:VGNC:39462]
ENSCAFG00000011817	COL18A1	collagen type XVIII alpha 1 chain [Source:HGNC Symbol;Acc:HGNC:2195]
ENSCAFG00000017018	COL1A1	collagen type I alpha 1 chain [Source:VGNC Symbol;Acc:VGNC:39464]
ENSCAFG00000009059	COL2A1	collagen type II alpha 1 chain [Source:VGNC Symbol;Acc:VGNC:39471]
ENSCAFG00000014812	COL3A1	collagen type III alpha 1 chain [Source:VGNC Symbol;Acc:VGNC:39472]
ENSCAFG00000006062	COL4A1	collagen type IV alpha 1 chain [Source:VGNC Symbol;Acc:VGNC:39473]
ENSCAFG00000006069	COL4A2	collagen type IV alpha 2 chain [Source:VGNC Symbol;Acc:VGNC:39474]
ENSCAFG00000010426	COL4A3	collagen type IV alpha 3 chain [Source:HGNC Symbol;Acc:HGNC:2204]
ENSCAFG00000010423	COL4A4	collagen type IV alpha 4 chain [Source:VGNC Symbol;Acc:VGNC:39476]
ENSCAFG00000018020	COL4A5	collagen type IV alpha 5 chain [Source:HGNC Symbol;Acc:HGNC:2207]
ENSCAFG00000018016	COL4A6	collagen type IV alpha 6 chain [Source:VGNC Symbol;Acc:VGNC:39477]
ENSCAFG00000019848	COL5A1	collagen type V alpha 1 chain [Source:HGNC Symbol;Acc:HGNC:2209]
ENSCAFG00000011911	COL6A1	collagen type VI alpha 1 chain [Source:VGNC Symbol;Acc:VGNC:39480]
ENSCAFG00000012226	COL6A3	collagen type VI alpha 3 chain [Source:VGNC Symbol;Acc:VGNC:39481]
ENSCAFG00000031675	COL8A1	collagen type VIII alpha 1 chain [Source:VGNC Symbol;Acc:VGNC:39484]
ENSCAFG00000032454	COL8A2	collagen type VIII alpha 2 chain [Source:VGNC Symbol;Acc:VGNC:39485]
ENSCAFG00000002589	COL9A1	collagen type IX alpha 1 chain [Source:HGNC Symbol;Acc:HGNC:2217]
ENSCAFG00000002997	COL9A2	collagen type IX alpha 2 chain [Source:VGNC Symbol;Acc:VGNC:39486]
ENSCAFG00000003090	COMMD1	Copper metabolism domain containing 1 [Source:VGNC Symbol;Acc:VGNC:39491]
ENSCAFG00000014616	COMP	cartilage oligomeric matrix protein [Source:VGNC Symbol;Acc:VGNC:39500]
ENSCAFG00000014253	COMT	catechol-O-methyltransferase [Source:VGNC Symbol;Acc:VGNC:39501]
ENSCAFG00000009090	COQ2	coenzyme Q2, polyprenyltransferase [Source:VGNC Symbol;Acc:VGNC:39517]
ENSCAFG00000020067	COQ4	coenzyme Q4 [Source:VGNC Symbol;Acc:VGNC:39519]
ENSCAFG00000016885	COQ6	coenzyme Q6, monooxygenase [Source:VGNC Symbol;Acc:VGNC:39521]
ENSCAFG00000018135	COQ7	coenzyme Q7, hydroxylase [Source:VGNC Symbol;Acc:VGNC:39522]
ENSCAFG00000016023	COQ8A	coenzyme Q8A [Source:VGNC Symbol;Acc:VGNC:39523]
ENSCAFG00000008731	COQ9	coenzyme Q9 [Source:VGNC Symbol;Acc:VGNC:39525]
ENSCAFG00000001907	CORIN	corin, serine peptidase [Source:VGNC Symbol;Acc:VGNC:39526]
ENSCAFG00000017899	COX10	COX10, heme A:farnesyltransferase cytochrome c oxidase assembly factor [Source:VGNC Symbol;Acc:VGNC:39533]
ENSCAFG00000030967	COX14	COX14, cytochrome c oxidase assembly factor [Source:VGNC Symbol;Acc:VGNC:39534]
ENSCAFG00000009515	COX15	COX15, cytochrome c oxidase assembly homolog [Source:VGNC Symbol;Acc:VGNC:39535]
ENSCAFG00000022730	COX3	cytochrome c oxidase subunit III (mitochondrion) [Source:RefSeq peptide;Acc:NP_008477]
ENSCAFG00000006578	COX7A1	cytochrome c oxidase subunit 7A1 [Source:HGNC Symbol;Acc:HGNC:2287]
ENSCAFG00000008324	CP	ceruloplasmin [Source:VGNC Symbol;Acc:VGNC:39542]
ENSCAFG00000004499	CPB2	carboxypeptidase B2 [Source:VGNC Symbol;Acc:VGNC:39550]
ENSCAFG00000016716	CPLX2	complexin 2 [Source:VGNC Symbol;Acc:VGNC:39556]
ENSCAFG00000031721	CPNE1	copine 1 [Source:VGNC Symbol;Acc:VGNC:39560]
ENSCAFG00000009182	CPOX	coproporphyrinogen oxidase [Source:HGNC Symbol;Acc:HGNC:2321]
ENSCAFG00000010757	CPT1A	carnitine palmitoyltransferase 1A [Source:VGNC Symbol;Acc:VGNC:39579]
ENSCAFG00000013510	CREB1	cAMP responsive element binding protein 1 [Source:VGNC Symbol;Acc:VGNC:39595]
ENSCAFG00000019251	CREBBP	CREB binding protein [Source:VGNC Symbol;Acc:VGNC:39601]
ENSCAFG00000030126	CRH	corticotropin releasing hormone [Source:VGNC Symbol;Acc:VGNC:39609]
ENSCAFG00000011034	CRLF2	cytokine receptor like factor 2 [Source:VGNC Symbol;Acc:VGNC:39621]
ENSCAFG00000011787	CRP	C-reactive protein [Source:VGNC Symbol;Acc:VGNC:39628]
ENSCAFG00000008550	CRSP-2	Calcitonin receptor-stimulating peptide 2 [Source:UniProtKB/Swiss-Prot;Acc:Q75V93]
ENSCAFG00000004868	CRSP-3	N/A
ENSCAFG00000009271	CRTAC1	cartilage acidic protein 1 [Source:VGNC Symbol;Acc:VGNC:39629]
ENSCAFG00000017402	CRTC2	CREB regulated transcription coactivator 2 [Source:HGNC Symbol;Acc:HGNC:27301]
ENSCAFG00000010584	CRYAA	Alpha-crystallin A chain [Source:UniProtKB/Swiss-Prot;Acc:P68280]
ENSCAFG00000014074	CRYAB	crystallin alpha B [Source:VGNC Symbol;Acc:VGNC:39635]
ENSCAFG00000018885	CRYBA1	crystallin beta A1 [Source:VGNC Symbol;Acc:VGNC:39636]
ENSCAFG00000014999	CRYBA2	crystallin beta A2 [Source:VGNC Symbol;Acc:VGNC:39637]
ENSCAFG00000011809	CRYBA4	crystallin beta A4 [Source:VGNC Symbol;Acc:VGNC:39638]
ENSCAFG00000011779	CRYBB1	crystallin beta B1 [Source:VGNC Symbol;Acc:VGNC:39639]
ENSCAFG00000023827	CRYBB2	crystallin beta B2 [Source:VGNC Symbol;Acc:VGNC:39640]
ENSCAFG00000011573	CRYBB3	crystallin beta B3 [Source:VGNC Symbol;Acc:VGNC:39641]
ENSCAFG00000031651	CRYGA	crystallin gamma A [Source:HGNC Symbol;Acc:HGNC:2408]
ENSCAFG00000032653	CRYGB	crystallin gamma B [Source:VGNC Symbol;Acc:VGNC:39644]
ENSCAFG00000029708	CRYGC	Gamma-crystallin C [Source:UniProtKB/Swiss-Prot;Acc:A3RLE2]
ENSCAFG00000029056	CRYGD	Canis lupus familiaris crystallin, gamma D (CRYGD), mRNA. [Source:RefSeq mRNA;Acc:NM_001113169]
ENSCAFG00000013524	CRYGS	crystallin gamma S [Source:VGNC Symbol;Acc:VGNC:39646]
ENSCAFG00000017807	CRYM	crystallin mu [Source:VGNC Symbol;Acc:VGNC:39648]
ENSCAFG00000001051	CSDC2	cold shock domain containing C2 [Source:HGNC Symbol;Acc:HGNC:30359]
ENSCAFG00000000820	CSF2	colony stimulating factor 2 [Source:VGNC Symbol;Acc:VGNC:39654]
ENSCAFG00000016261	CSF3	colony stimulating factor 3 [Source:VGNC Symbol;Acc:VGNC:39657]
ENSCAFG00000009424	CSRP3	cysteine and glycine rich protein 3 [Source:VGNC Symbol;Acc:VGNC:39676]
ENSCAFG00000011877	CSTA	cystatin A [Source:VGNC Symbol;Acc:VGNC:39681]
ENSCAFG00000020355	CTCF	CCCTC-binding factor [Source:VGNC Symbol;Acc:VGNC:39690]
ENSCAFG00000000010	CTDP1	CTD phosphatase subunit 1 [Source:VGNC Symbol;Acc:VGNC:39692]
ENSCAFG00000029442	CTGF	connective tissue growth factor [Source:VGNC Symbol;Acc:VGNC:39696]
ENSCAFG00000020417	CTH	cystathionine gamma-lyase [Source:VGNC Symbol;Acc:VGNC:39697]
ENSCAFG00000005204	CTNNB1	catenin beta 1 [Source:VGNC Symbol;Acc:VGNC:39700]
ENSCAFG00000009968	CTNND2	catenin delta 2 [Source:VGNC Symbol;Acc:VGNC:39702]
ENSCAFG00000007638	CTR9	CTR9 homolog, Paf1/RNA polymerase II complex component [Source:VGNC Symbol;Acc:VGNC:39706]
ENSCAFG00000016301	CTRC	chymotrypsin C [Source:HGNC Symbol;Acc:HGNC:2523]
ENSCAFG00000009819	CTSA	cathepsin A [Source:VGNC Symbol;Acc:VGNC:39708]
ENSCAFG00000007934	CTSB	cathepsin B [Source:VGNC Symbol;Acc:VGNC:39709]
ENSCAFG00000010052	CTSD	Cathepsin D [Source:UniProtKB/Swiss-Prot;Acc:Q4LAL9]
ENSCAFG00000010206	CTSE	cathepsin E [Source:VGNC Symbol;Acc:VGNC:39710]
ENSCAFG00000012434	CTSF	cathepsin F [Source:VGNC Symbol;Acc:VGNC:39711]
ENSCAFG00000014076	CTSH	cathepsin H [Source:VGNC Symbol;Acc:VGNC:39713]
ENSCAFG00000012093	CTSK	cathepsin K [Source:VGNC Symbol;Acc:VGNC:39714]
ENSCAFG00000001149	CTSL	Cathepsin L1 Cathepsin L1 heavy chain Cathepsin L1 light chain [Source:UniProtKB/Swiss-Prot;Acc:Q9GL24]
ENSCAFG00000015024	CTSL	Cathepsin L1 Cathepsin L1 heavy chain Cathepsin L1 light chain [Source:UniProtKB/Swiss-Prot;Acc:Q9GL24]
ENSCAFG00000012086	CTSS	cathepsin S [Source:VGNC Symbol;Acc:VGNC:39715]
ENSCAFG00000014160	CWC22	CWC22 spliceosome associated protein homolog [Source:VGNC Symbol;Acc:VGNC:39741]
ENSCAFG00000008761	CX3CL1	C-X3-C motif chemokine ligand 1 [Source:VGNC Symbol;Acc:VGNC:39745]
ENSCAFG00000031104	CX3CR1	C-X3-C motif chemokine receptor 1 [Source:VGNC Symbol;Acc:VGNC:39746]
ENSCAFG00000008584	CXCL10	C-X-C motif chemokine 10 [Source:UniProtKB/Swiss-Prot;Acc:Q5KSV9]
ENSCAFG00000007026	CXCL12	C-X-C motif chemokine ligand 12 [Source:HGNC Symbol;Acc:HGNC:10672]
ENSCAFG00000008692	CXCL13	C-X-C motif chemokine ligand 13 [Source:VGNC Symbol;Acc:VGNC:39747]
ENSCAFG00000003029	CXCL8	C-X-C motif chemokine ligand 8 [Source:VGNC Symbol;Acc:VGNC:39749]
ENSCAFG00000017146	CXCR3	Canis lupus familiaris C-X-C motif chemokine receptor 3 (CXCR3), mRNA. [Source:RefSeq mRNA;Acc:NM_001011887]
ENSCAFG00000005109	CXCR4	C-X-C motif chemokine receptor 4 [Source:VGNC Symbol;Acc:VGNC:39751]
ENSCAFG00000019881	CYBA	cytochrome b-245 alpha chain [Source:HGNC Symbol;Acc:HGNC:2577]
ENSCAFG00000010279	CYP17A1	cytochrome P450 family 17 subfamily A member 1 [Source:HGNC Symbol;Acc:HGNC:2593]
ENSCAFG00000017937	CYP1A1	cytochrome P450 family 1 subfamily A member 1 [Source:HGNC Symbol;Acc:HGNC:2595]
ENSCAFG00000006164	CYP1B1	cytochrome P450 family 1 subfamily B member 1 [Source:HGNC Symbol;Acc:HGNC:2597]
ENSCAFG00000014943	CYP27A1	cytochrome P450 family 27 subfamily A member 1 [Source:HGNC Symbol;Acc:HGNC:2605]
ENSCAFG00000000287	CYP27B1	cytochrome P450 family 27 subfamily B member 1 [Source:HGNC Symbol;Acc:HGNC:2606]
ENSCAFG00000032339	CYP2A13	cytochrome P450 family 2 subfamily A polypeptide 13 [Source:RefSeq peptide;Acc:NP_001032422]
ENSCAFG00000031823	CYP2A7	N/A
ENSCAFG00000013318	CYP2E1	Cytochrome P450 2E1 [Source:UniProtKB/Swiss-Prot;Acc:Q9MZY0]
ENSCAFG00000014877	CYP3A12	Canis lupus familiaris cytochrome P-450 3A12 (CYP3A12), mRNA. [Source:RefSeq mRNA;Acc:NM_001003340]
ENSCAFG00000014942	CYP3A26	N/A
ENSCAFG00000017838	CYP46A1	cytochrome P450 family 46 subfamily A member 1 [Source:HGNC Symbol;Acc:HGNC:2641]
ENSCAFG00000007384	CYP4V2	cytochrome P450 family 4 subfamily V member 2 [Source:HGNC Symbol;Acc:HGNC:23198]
ENSCAFG00000007098	CYP7A1	cytochrome P450 family 7 subfamily A member 1 [Source:HGNC Symbol;Acc:HGNC:2651]
ENSCAFG00000017282	CYSLTR1	cysteinyl leukotriene receptor 1 [Source:HGNC Symbol;Acc:HGNC:17451]
ENSCAFG00000004428	CYSLTR2	cysteinyl leukotriene receptor 2 [Source:HGNC Symbol;Acc:HGNC:18274]
ENSCAFG00000004978	DACH1	dachshund family transcription factor 1 [Source:HGNC Symbol;Acc:HGNC:2663]
ENSCAFG00000011207	DAG1	dystroglycan 1 [Source:VGNC Symbol;Acc:VGNC:39763]
ENSCAFG00000019783	DBH	dopamine beta-hydroxylase [Source:VGNC Symbol;Acc:VGNC:39781]
ENSCAFG00000012660	DCAF17	DDB1 and CUL4 associated factor 17 [Source:VGNC Symbol;Acc:VGNC:39793]
ENSCAFG00000010260	DCDC2	doublecortin domain containing 2 [Source:VGNC Symbol;Acc:VGNC:39800]
ENSCAFG00000006142	DCN	Decorin [Source:UniProtKB/Swiss-Prot;Acc:Q29393]
ENSCAFG00000008608	DCTN1	dynactin subunit 1 [Source:VGNC Symbol;Acc:VGNC:39816]
ENSCAFG00000029993	DDAH1	dimethylarginine dimethylaminohydrolase 1 [Source:VGNC Symbol;Acc:VGNC:39827]
ENSCAFG00000000617	DDAH2	dimethylarginine dimethylaminohydrolase 2 [Source:VGNC Symbol;Acc:VGNC:39828]
ENSCAFG00000030112	DDIT3	DNA damage inducible transcript 3 [Source:VGNC Symbol;Acc:VGNC:39836]
ENSCAFG00000000448	DDR1	discoidin domain receptor tyrosine kinase 1 [Source:HGNC Symbol;Acc:HGNC:2730]
ENSCAFG00000013180	DDR2	discoidin domain receptor tyrosine kinase 2 [Source:VGNC Symbol;Acc:VGNC:39842]
ENSCAFG00000001807	DDX58	DExD/H-box helicase 58 [Source:VGNC Symbol;Acc:VGNC:39867]
ENSCAFG00000006569	DEAF1	DEAF1, transcription factor [Source:VGNC Symbol;Acc:VGNC:39870]
ENSCAFG00000025075	DEFB1	defensin beta 1 [Source:VGNC Symbol;Acc:VGNC:39876]
ENSCAFG00000020227	DENND1A	DENN domain containing 1A [Source:VGNC Symbol;Acc:VGNC:39884]
ENSCAFG00000012635	DERA	deoxyribose-phosphate aldolase [Source:VGNC Symbol;Acc:VGNC:39901]
ENSCAFG00000015475	DES	desmin [Source:VGNC Symbol;Acc:VGNC:39905]
ENSCAFG00000014196	DGCR8	DGCR8, microprocessor complex subunit [Source:HGNC Symbol;Acc:HGNC:2847]
ENSCAFG00000009248	DGKZ	diacylglycerol kinase zeta [Source:VGNC Symbol;Acc:VGNC:39924]
ENSCAFG00000007933	DIABLO	diablo IAP-binding mitochondrial protein [Source:VGNC Symbol;Acc:VGNC:39954]
ENSCAFG00000006149	DIAPH1	diaphanous related formin 1 [Source:VGNC Symbol;Acc:VGNC:39955]
ENSCAFG00000004902	DIAPH3	diaphanous related formin 3 [Source:VGNC Symbol;Acc:VGNC:39957]
ENSCAFG00000017701	DICER1	dicer 1, ribonuclease III [Source:VGNC Symbol;Acc:VGNC:39958]
ENSCAFG00000015553	DKK1	dickkopf WNT signaling pathway inhibitor 1 [Source:HGNC Symbol;Acc:HGNC:2891]
ENSCAFG00000007845	DKK3	Canis lupus familiaris dickkopf WNT signaling pathway inhibitor 3 (DKK3), mRNA. [Source:RefSeq mRNA;Acc:NM_001284475]
ENSCAFG00000032222	DLA-12	MHC class I DLA-12 precursor [Source:RefSeq peptide;Acc:NP_001014401]
ENSCAFG00000000500	DLA-64	N/A
ENSCAFG00000008234	DLA-79	N/A
ENSCAFG00000000487	DLA88	MHC class I DLA-88 precursor [Source:RefSeq peptide;Acc:NP_001014767]
ENSCAFG00000000896	DLA-DOA	HLA class II histocompatibility antigen, DO alpha chain-like precursor [Source:RefSeq peptide;Acc:NP_001300716]
ENSCAFG00000000812	DLA-DQA1	major histocompatibility complex, class II, DQ alpha precursor [Source:RefSeq peptide;Acc:NP_001011726]
ENSCAFG00000000814	DLA-DQB1	major histocompatibility complex, class II, DQ beta 1 precursor [Source:RefSeq peptide;Acc:NP_001014403]
ENSCAFG00000017925	DLK1	delta like non-canonical Notch ligand 1 [Source:VGNC Symbol;Acc:VGNC:39984]
ENSCAFG00000012561	DMBT1	deleted in malignant brain tumors 1 [Source:VGNC Symbol;Acc:VGNC:39996]
ENSCAFG00000004231	DMBX1	diencephalon/mesencephalon homeobox 1 [Source:VGNC Symbol;Acc:VGNC:39997]
ENSCAFG00000023562	DMD	Dystrophin [Source:VGNC Symbol;Acc:VGNC:54134]
ENSCAFG00000004392	DMPK	DM1 protein kinase [Source:VGNC Symbol;Acc:VGNC:40001]
ENSCAFG00000015444	DMXL2	Dmx like 2 [Source:VGNC Symbol;Acc:VGNC:40007]
ENSCAFG00000019964	DNAAF1	dynein axonemal assembly factor 1 [Source:HGNC Symbol;Acc:HGNC:30539]
ENSCAFG00000014201	DNAAF2	dynein axonemal assembly factor 2 [Source:HGNC Symbol;Acc:HGNC:20188]
ENSCAFG00000015932	DNAAF4	dynein axonemal assembly factor 4 [Source:VGNC Symbol;Acc:VGNC:40009]
ENSCAFG00000011256	DNAAF5	dynein axonemal assembly factor 5 [Source:VGNC Symbol;Acc:VGNC:40010]
ENSCAFG00000009717	DNAH1	dynein axonemal heavy chain 1 [Source:VGNC Symbol;Acc:VGNC:40011]
ENSCAFG00000002717	DNAH11	dynein axonemal heavy chain 11 [Source:VGNC Symbol;Acc:VGNC:40013]
ENSCAFG00000009850	DNAH5	dynein axonemal heavy chain 5 [Source:VGNC Symbol;Acc:VGNC:40016]
ENSCAFG00000007917	DNAH6	dynein axonemal heavy chain 6 [Source:VGNC Symbol;Acc:VGNC:40017]
ENSCAFG00000010384	DNAH7	dynein axonemal heavy chain 7 [Source:HGNC Symbol;Acc:HGNC:18661]
ENSCAFG00000001518	DNAH8	dynein axonemal heavy chain 8 [Source:VGNC Symbol;Acc:VGNC:40018]
ENSCAFG00000001923	DNAI1	dynein axonemal intermediate chain 1 [Source:VGNC Symbol;Acc:VGNC:40020]
ENSCAFG00000004532	DNAI2	dynein axonemal intermediate chain 2 [Source:VGNC Symbol;Acc:VGNC:40021]
ENSCAFG00000001818	DNAJA1	DnaJ heat shock protein family (Hsp40) member A1 [Source:HGNC Symbol;Acc:HGNC:5229]
ENSCAFG00000019212	DNAJA3	DnaJ heat shock protein family (Hsp40) member A3 [Source:HGNC Symbol;Acc:HGNC:11808]
ENSCAFG00000005569	DNAJB13	DnaJ heat shock protein family (Hsp40) member B13 [Source:HGNC Symbol;Acc:HGNC:30718]
ENSCAFG00000005174	DNAJB6	DnaJ heat shock protein family (Hsp40) member B6 [Source:HGNC Symbol;Acc:HGNC:14888]
ENSCAFG00000032714	DNAJC19	DnaJ heat shock protein family (Hsp40) member C19 [Source:HGNC Symbol;Acc:HGNC:30528]
ENSCAFG00000005480	DNAJC3	DnaJ heat shock protein family (Hsp40) member C3 [Source:HGNC Symbol;Acc:HGNC:9439]
ENSCAFG00000013084	DNAJC5	DnaJ heat shock protein family (Hsp40) member C5 [Source:HGNC Symbol;Acc:HGNC:16235]
ENSCAFG00000016858	DNAL1	dynein axonemal light chain 1 [Source:HGNC Symbol;Acc:HGNC:23247]
ENSCAFG00000010528	DNM1L	dynamin 1 like [Source:VGNC Symbol;Acc:VGNC:40032]
ENSCAFG00000017651	DNM2	dynamin 2 [Source:VGNC Symbol;Acc:VGNC:40033]
ENSCAFG00000004159	DNMT3A	DNA methyltransferase 3 alpha [Source:VGNC Symbol;Acc:VGNC:40036]
ENSCAFG00000009001	DOCK5	dedicator of cytokinesis 5 [Source:VGNC Symbol;Acc:VGNC:40049]
ENSCAFG00000001957	DOCK8	dedicator of cytokinesis 8 [Source:VGNC Symbol;Acc:VGNC:40052]
ENSCAFG00000014622	DOK7	docking protein 7 [Source:HGNC Symbol;Acc:HGNC:26594]
ENSCAFG00000019420	DOT1L	DOT1 like histone lysine methyltransferase [Source:HGNC Symbol;Acc:HGNC:24948]
ENSCAFG00000009904	DPCD	deleted in primary ciliary dyskinesia homolog (mouse) [Source:HGNC Symbol;Acc:HGNC:24542]
ENSCAFG00000005881	DPH3	diphthamide biosynthesis 3 [Source:HGNC Symbol;Acc:HGNC:27717]
ENSCAFG00000017056	DPM3	dolichyl-phosphate mannosyltransferase subunit 3 [Source:VGNC Symbol;Acc:VGNC:40071]
ENSCAFG00000025002	DPP4	dipeptidyl peptidase 4 [Source:VGNC Symbol;Acc:VGNC:40074]
ENSCAFG00000008753	DPYSL2	dihydropyrimidinase like 2 [Source:VGNC Symbol;Acc:VGNC:40083]
ENSCAFG00000004346	DRC1	dynein regulatory complex subunit 1 [Source:VGNC Symbol;Acc:VGNC:40091]
ENSCAFG00000016726	DRD1	dopamine receptor D1 [Source:VGNC Symbol;Acc:VGNC:40093]
ENSCAFG00000013890	DRD2	dopamine receptor D2 [Source:VGNC Symbol;Acc:VGNC:40094]
ENSCAFG00000010787	DRD3	dopamine receptor D3 [Source:VGNC Symbol;Acc:VGNC:40095]
ENSCAFG00000017618	DRP2	dystrophin related protein 2 [Source:HGNC Symbol;Acc:HGNC:3032]
ENSCAFG00000018085	DSC2	desmocollin 2 [Source:VGNC Symbol;Acc:VGNC:40101]
ENSCAFG00000010139	DSCAM	DS cell adhesion molecule [Source:VGNC Symbol;Acc:VGNC:40102]
ENSCAFG00000018051	DSG2	desmoglein 2 [Source:VGNC Symbol;Acc:VGNC:40106]
ENSCAFG00000017951	DTNA	dystrobrevin alpha [Source:VGNC Symbol;Acc:VGNC:40114]
ENSCAFG00000004223	DTNB	dystrobrevin beta [Source:HGNC Symbol;Acc:HGNC:3058]
ENSCAFG00000009893	DTNBP1	dystrobrevin binding protein 1 [Source:HGNC Symbol;Acc:HGNC:17328]
ENSCAFG00000013693	DUOX2	dual oxidase 2 [Source:VGNC Symbol;Acc:VGNC:40121]
ENSCAFG00000013701	DUOXA2	dual oxidase maturation factor 2 [Source:VGNC Symbol;Acc:VGNC:40123]
ENSCAFG00000029826	DUSP1	dual specificity phosphatase 1 [Source:HGNC Symbol;Acc:HGNC:3064]
ENSCAFG00000019275	DVL1	dishevelled segment polarity protein 1 [Source:HGNC Symbol;Acc:HGNC:3084]
ENSCAFG00000010318	DYNLL1	dynein light chain LC8-type 1 [Source:VGNC Symbol;Acc:VGNC:40150]
ENSCAFG00000009033	DYSF	dysferlin [Source:VGNC Symbol;Acc:VGNC:40159]
ENSCAFG00000005425	DZANK1	double zinc ribbon and ankyrin repeat domains 1 [Source:VGNC Symbol;Acc:VGNC:40160]
ENSCAFG00000009794	EDN1	endothelin 1 [Source:VGNC Symbol;Acc:VGNC:40199]
ENSCAFG00000002579	EDN2	endothelin 2 [Source:VGNC Symbol;Acc:VGNC:40200]
ENSCAFG00000012245	EDN3	endothelin 3 [Source:VGNC Symbol;Acc:VGNC:40201]
ENSCAFG00000007768	EDNRA	endothelin receptor type A [Source:VGNC Symbol;Acc:VGNC:40202]
ENSCAFG00000005187	EDNRB	endothelin receptor type B [Source:VGNC Symbol;Acc:VGNC:40203]
ENSCAFG00000002919	EFEMP1	EGF containing fibulin like extracellular matrix protein 1 [Source:VGNC Symbol;Acc:VGNC:40220]
ENSCAFG00000013195	EFEMP2	EGF containing fibulin like extracellular matrix protein 2 [Source:VGNC Symbol;Acc:VGNC:40221]
ENSCAFG00000007448	EFNA5	ephrin A5 [Source:HGNC Symbol;Acc:HGNC:3225]
ENSCAFG00000011532	EGF	epidermal growth factor [Source:VGNC Symbol;Acc:VGNC:40235]
ENSCAFG00000003465	EGFR	epidermal growth factor receptor [Source:HGNC Symbol;Acc:HGNC:3236]
ENSCAFG00000011772	EGLN1	egl-9 family hypoxia inducible factor 1 [Source:VGNC Symbol;Acc:VGNC:40240]
ENSCAFG00000013182	EGLN3	egl-9 family hypoxia inducible factor 3 [Source:VGNC Symbol;Acc:VGNC:40241]
ENSCAFG00000001254	EGR1	early growth response 1 [Source:HGNC Symbol;Acc:HGNC:3238]
ENSCAFG00000013049	EGR2	early growth response 2 [Source:HGNC Symbol;Acc:HGNC:3239]
ENSCAFG00000000669	EHMT2	euchromatic histone lysine methyltransferase 2 [Source:HGNC Symbol;Acc:HGNC:14129]
ENSCAFG00000007383	EIF2AK3	eukaryotic translation initiation factor 2 alpha kinase 3 [Source:VGNC Symbol;Acc:VGNC:40258]
ENSCAFG00000017886	ELAC2	elaC ribonuclease Z 2 [Source:VGNC Symbol;Acc:VGNC:40296]
ENSCAFG00000019669	ELANE	elastase, neutrophil expressed [Source:HGNC Symbol;Acc:HGNC:3309]
ENSCAFG00000007801	ELMOD3	ELMO domain containing 3 [Source:VGNC Symbol;Acc:VGNC:40314]
ENSCAFG00000028947	ELN	elastin [Source:HGNC Symbol;Acc:HGNC:3327]
ENSCAFG00000002276	ELOVL5	ELOVL fatty acid elongase 5 [Source:VGNC Symbol;Acc:VGNC:40323]
ENSCAFG00000002818	ELP1	elongator complex protein 1 [Source:VGNC Symbol;Acc:VGNC:40326]
ENSCAFG00000007510	ELP4	elongator acetyltransferase complex subunit 4 [Source:HGNC Symbol;Acc:HGNC:1171]
ENSCAFG00000032560	EMD	emerin [Source:VGNC Symbol;Acc:VGNC:40340]
ENSCAFG00000017867	EML1	echinoderm microtubule associated protein like 1 [Source:VGNC Symbol;Acc:VGNC:40346]
ENSCAFG00000005263	EMSY	EMSY, BRCA2 interacting transcriptional repressor [Source:VGNC Symbol;Acc:VGNC:40355]
ENSCAFG00000016185	ENAH	ENAH, actin regulator [Source:VGNC Symbol;Acc:VGNC:40357]
ENSCAFG00000020106	ENG	endoglin [Source:VGNC Symbol;Acc:VGNC:40362]
ENSCAFG00000014523	ENO2	enolase 2 [Source:VGNC Symbol;Acc:VGNC:40366]
ENSCAFG00000000001	ENPP1	ectonucleotide pyrophosphatase/phosphodiesterase 1 [Source:VGNC Symbol;Acc:VGNC:40374]
ENSCAFG00000001125	EP300	E1A binding protein p300 [Source:HGNC Symbol;Acc:HGNC:3373]
ENSCAFG00000002627	EPAS1	endothelial PAS domain protein 1 [Source:VGNC Symbol;Acc:VGNC:40391]
ENSCAFG00000017660	EPG5	ectopic P-granules autophagy protein 5 homolog [Source:VGNC Symbol;Acc:VGNC:40402]
ENSCAFG00000016011	EPHA2	EPH receptor A2 [Source:VGNC Symbol;Acc:VGNC:40405]
ENSCAFG00000002714	EPHA5	EPH receptor A5 [Source:VGNC Symbol;Acc:VGNC:40408]
ENSCAFG00000016160	EPHX1	epoxide hydrolase 1 [Source:VGNC Symbol;Acc:VGNC:40415]
ENSCAFG00000008438	EPHX2	epoxide hydrolase 2 [Source:VGNC Symbol;Acc:VGNC:40416]
ENSCAFG00000014203	EPO	erythropoietin [Source:VGNC Symbol;Acc:VGNC:40422]
ENSCAFG00000012724	EPS8	epidermal growth factor receptor pathway substrate 8 [Source:VGNC Symbol;Acc:VGNC:40427]
ENSCAFG00000025183	EPS8L2	EPS8 like 2 [Source:VGNC Symbol;Acc:VGNC:40429]
ENSCAFG00000006129	EPYC	epiphycan [Source:VGNC Symbol;Acc:VGNC:40431]
ENSCAFG00000016351	ERBB2	erb-b2 receptor tyrosine kinase 2 [Source:VGNC Symbol;Acc:VGNC:40436]
ENSCAFG00000004487	ERCC2	ERCC excision repair 2, TFIIH core complex helicase subunit [Source:VGNC Symbol;Acc:VGNC:40442]
ENSCAFG00000006624	ERCC6	ERCC excision repair 6, chromatin remodeling factor [Source:VGNC Symbol;Acc:VGNC:40445]
ENSCAFG00000031552	ERF	ETS2 repressor factor [Source:VGNC Symbol;Acc:VGNC:40447]
ENSCAFG00000011147	ESAM	endothelial cell adhesion molecule [Source:HGNC Symbol;Acc:HGNC:17474]
ENSCAFG00000018381	ESM1	endothelial cell specific molecule 1 [Source:VGNC Symbol;Acc:VGNC:40474]
ENSCAFG00000019595	ESPN	espin [Source:HGNC Symbol;Acc:HGNC:13281]
ENSCAFG00000000430	ESR1	estrogen receptor 1 [Source:VGNC Symbol;Acc:VGNC:40476]
ENSCAFG00000015846	ESR2	estrogen receptor 2 [Source:VGNC Symbol;Acc:VGNC:40477]
ENSCAFG00000017141	ESRRB	estrogen related receptor beta [Source:VGNC Symbol;Acc:VGNC:40480]
ENSCAFG00000010767	ESRRG	estrogen related receptor gamma [Source:VGNC Symbol;Acc:VGNC:40481]
ENSCAFG00000009173	EXOC2	exocyst complex component 2 [Source:VGNC Symbol;Acc:VGNC:40513]
ENSCAFG00000009477	EXT2	exostosin glycosyltransferase 2 [Source:VGNC Symbol;Acc:VGNC:40532]
ENSCAFG00000008284	EXTL3	exostosin like glycosyltransferase 3 [Source:VGNC Symbol;Acc:VGNC:40535]
ENSCAFG00000007894	EYA1	EYA transcriptional coactivator and phosphatase 1 [Source:VGNC Symbol;Acc:VGNC:40536]
ENSCAFG00000000196	EYA4	EYA transcriptional coactivator and phosphatase 4 [Source:VGNC Symbol;Acc:VGNC:40539]
ENSCAFG00000003411	EZH2	enhancer of zeste 2 polycomb repressive complex 2 subunit [Source:VGNC Symbol;Acc:VGNC:40541]
ENSCAFG00000009122	F2	coagulation factor II, thrombin [Source:VGNC Symbol;Acc:VGNC:40547]
ENSCAFG00000009281	F2RL1	F2R like trypsin receptor 1 [Source:VGNC Symbol;Acc:VGNC:40549]
ENSCAFG00000015215	F5	coagulation factor V [Source:VGNC Symbol;Acc:VGNC:40551]
ENSCAFG00000019631	F8	coagulation factor VIII [Source:VGNC Symbol;Acc:VGNC:40553]
ENSCAFG00000004254	FAAH	fatty acid amide hydrolase [Source:HGNC Symbol;Acc:HGNC:3553]
ENSCAFG00000007413	FABP1	fatty acid binding protein 1 [Source:VGNC Symbol;Acc:VGNC:40558]
ENSCAFG00000012462	FABP2	fatty acid binding protein 2 [Source:VGNC Symbol;Acc:VGNC:40560]
ENSCAFG00000016019	FADS2	fatty acid desaturase 2 [Source:VGNC Symbol;Acc:VGNC:40564]
ENSCAFG00000015963	FADS3	fatty acid desaturase 3 [Source:VGNC Symbol;Acc:VGNC:40565]
ENSCAFG00000013958	FAH	fumarylacetoacetate hydrolase [Source:VGNC Symbol;Acc:VGNC:40569]
ENSCAFG00000008382	FAIM2	Fas apoptotic inhibitory molecule 2 [Source:VGNC Symbol;Acc:VGNC:40571]
ENSCAFG00000025213	FAM111B	family with sequence similarity 111 member B [Source:VGNC Symbol;Acc:VGNC:40579]
ENSCAFG00000002742	FAM126A	family with sequence similarity 126 member A [Source:VGNC Symbol;Acc:VGNC:40587]
ENSCAFG00000015712	FAS	Fas cell surface death receptor [Source:VGNC Symbol;Acc:VGNC:40734]
ENSCAFG00000014678	FASLG	Canis lupus familiaris Fas ligand (FASLG), mRNA. [Source:RefSeq mRNA;Acc:NM_001287153]
ENSCAFG00000006006	FASN	fatty acid synthase [Source:VGNC Symbol;Acc:VGNC:40736]
ENSCAFG00000013457	FASTKD2	FAST kinase domains 2 [Source:VGNC Symbol;Acc:VGNC:40739]
ENSCAFG00000007273	FAT1	FAT atypical cadherin 1 [Source:VGNC Symbol;Acc:VGNC:40742]
ENSCAFG00000014548	FBN1	fibrillin 1 [Source:VGNC Symbol;Acc:VGNC:40754]
ENSCAFG00000000681	FBN2	fibrillin 2 [Source:VGNC Symbol;Acc:VGNC:40755]
ENSCAFG00000003467	FBXL4	F-box and leucine rich repeat protein 4 [Source:VGNC Symbol;Acc:VGNC:40760]
ENSCAFG00000001007	FBXO32	F-box protein 32 [Source:VGNC Symbol;Acc:VGNC:40774]
ENSCAFG00000011755	FCER1A	Fc fragment of IgE receptor Ia [Source:VGNC Symbol;Acc:VGNC:40801]
ENSCAFG00000012878	FCER1G	Fc fragment of IgE receptor Ig [Source:VGNC Symbol;Acc:VGNC:40802]
ENSCAFG00000007032	FFAR1	free fatty acid receptor 1 [Source:VGNC Symbol;Acc:VGNC:40830]
ENSCAFG00000008424	FGB	fibrinogen beta chain [Source:HGNC Symbol;Acc:HGNC:3662]
ENSCAFG00000010589	FGD4	FYVE, RhoGEF and PH domain containing 4 [Source:VGNC Symbol;Acc:VGNC:40836]
ENSCAFG00000031965	FGF1	fibroblast growth factor 1 [Source:HGNC Symbol;Acc:HGNC:3665]
ENSCAFG00000010693	FGF19	fibroblast growth factor 19 [Source:VGNC Symbol;Acc:VGNC:40846]
ENSCAFG00000003996	FGF2	fibroblast growth factor 2 [Source:VGNC Symbol;Acc:VGNC:40847]
ENSCAFG00000006845	FGF20	fibroblast growth factor 20 [Source:HGNC Symbol;Acc:HGNC:3677]
ENSCAFG00000003904	FGF21	fibroblast growth factor 21 [Source:VGNC Symbol;Acc:VGNC:40848]
ENSCAFG00000015365	FGF23	fibroblast growth factor 23 [Source:HGNC Symbol;Acc:HGNC:3680]
ENSCAFG00000005970	FGFR1	fibroblast growth factor receptor 1 [Source:VGNC Symbol;Acc:VGNC:40856]
ENSCAFG00000012374	FGFR2	fibroblast growth factor receptor 2 [Source:VGNC Symbol;Acc:VGNC:40859]
ENSCAFG00000014993	FGFR3	fibroblast growth factor receptor 3 [Source:VGNC Symbol;Acc:VGNC:40860]
ENSCAFG00000018884	FGGY	FGGY carbohydrate kinase domain containing [Source:VGNC Symbol;Acc:VGNC:40863]
ENSCAFG00000017786	FHOD3	formin homology 2 domain containing 3 [Source:VGNC Symbol;Acc:VGNC:40876]
ENSCAFG00000003842	FIG4	FIG4 phosphoinositide 5-phosphatase [Source:VGNC Symbol;Acc:VGNC:40879]
ENSCAFG00000004208	FKRP	fukutin related protein [Source:VGNC Symbol;Acc:VGNC:40896]
ENSCAFG00000002770	FKTN	fukutin [Source:VGNC Symbol;Acc:VGNC:40897]
ENSCAFG00000019521	FLNA	filamin A [Source:VGNC Symbol;Acc:VGNC:40900]
ENSCAFG00000007603	FLNB	filamin B [Source:VGNC Symbol;Acc:VGNC:40901]
ENSCAFG00000001585	FLNC	filamin C [Source:VGNC Symbol;Acc:VGNC:40902]
ENSCAFG00000006701	FLT1	fms related tyrosine kinase 1 [Source:VGNC Symbol;Acc:VGNC:40907]
ENSCAFG00000019085	FMR1	fragile X mental retardation 1 [Source:VGNC Symbol;Acc:VGNC:40922]
ENSCAFG00000014345	FN1	fibronectin 1 [Source:HGNC Symbol;Acc:HGNC:3778]
ENSCAFG00000032747	FN3K	fructosamine 3 kinase [Source:HGNC Symbol;Acc:HGNC:24822]
ENSCAFG00000008315	FNBP4	formin binding protein 4 [Source:VGNC Symbol;Acc:VGNC:40926]
ENSCAFG00000015349	FNDC3B	fibronectin type III domain containing 3B [Source:VGNC Symbol;Acc:VGNC:40929]
ENSCAFG00000010445	FNDC5	fibronectin type III domain containing 5 [Source:VGNC Symbol;Acc:VGNC:40931]
ENSCAFG00000025256	FOCAD	focadhesin [Source:VGNC Symbol;Acc:VGNC:40938]
ENSCAFG00000029337	FOPNL	FGFR1OP N-terminal like [Source:VGNC Symbol;Acc:VGNC:40939]
ENSCAFG00000013132	FOSL1	FOS like 1, AP-1 transcription factor subunit [Source:VGNC Symbol;Acc:VGNC:40942]
ENSCAFG00000004363	FOXA3	forkhead box A3 [Source:VGNC Symbol;Acc:VGNC:40945]
ENSCAFG00000019916	FOXC2	forkhead box C2 [Source:VGNC Symbol;Acc:VGNC:40948]
ENSCAFG00000004028	FOXE3	forkhead box E3 [Source:HGNC Symbol;Acc:HGNC:3808]
ENSCAFG00000016968	FOXI1	forkhead box I1 [Source:VGNC Symbol;Acc:VGNC:40951]
ENSCAFG00000005965	FOXO1	forkhead box O1 [Source:HGNC Symbol;Acc:HGNC:3819]
ENSCAFG00000003783	FOXO3	forkhead box O3 [Source:VGNC Symbol;Acc:VGNC:40963]
ENSCAFG00000006461	FOXP1	forkhead box P1 [Source:VGNC Symbol;Acc:VGNC:40965]
ENSCAFG00000003387	FOXP2	forkhead box P2 [Source:VGNC Symbol;Acc:VGNC:40966]
ENSCAFG00000015934	FOXP3	forkhead box P3 [Source:VGNC Symbol;Acc:VGNC:40967]
ENSCAFG00000010449	FOXRED1	FAD dependent oxidoreductase domain containing 1 [Source:VGNC Symbol;Acc:VGNC:40971]
ENSCAFG00000001537	FREM1	FRAS1 related extracellular matrix 1 [Source:VGNC Symbol;Acc:VGNC:40976]
ENSCAFG00000007135	FRG1	FSHD region gene 1 [Source:HGNC Symbol;Acc:HGNC:3954]
ENSCAFG00000002698	FSHR	follicle stimulating hormone receptor [Source:VGNC Symbol;Acc:VGNC:40997]
ENSCAFG00000018405	FST	follistatin [Source:HGNC Symbol;Acc:HGNC:3971]
ENSCAFG00000003861	FTL	Ferritin light chain [Source:UniProtKB/Swiss-Prot;Acc:Q53VB8]
ENSCAFG00000005494	FTL	Ferritin light chain [Source:UniProtKB/Swiss-Prot;Acc:Q53VB8]
ENSCAFG00000009463	FTO	FTO, alpha-ketoglutarate dependent dioxygenase [Source:VGNC Symbol;Acc:VGNC:41003]
ENSCAFG00000012353	FURIN	furin, paired basic amino acid cleaving enzyme [Source:VGNC Symbol;Acc:VGNC:41010]
ENSCAFG00000018754	FUT5	fucosyltransferase 5 [Source:RefSeq peptide;Acc:NP_001005378]
ENSCAFG00000029645	FXN	frataxin [Source:VGNC Symbol;Acc:VGNC:41018]
ENSCAFG00000011582	FXR1	FMR1 autosomal homolog 1 [Source:HGNC Symbol;Acc:HGNC:4023]
ENSCAFG00000007095	FXYD1	FXYD domain containing ion transport regulator 1 [Source:VGNC Symbol;Acc:VGNC:41019]
ENSCAFG00000007124	FXYD3	FXYD domain containing ion transport regulator 3 [Source:VGNC Symbol;Acc:VGNC:41021]
ENSCAFG00000024320	FXYD5	FXYD domain containing ion transport regulator 5 [Source:VGNC Symbol;Acc:VGNC:41023]
ENSCAFG00000023062	FYB1	FYN binding protein 1 [Source:VGNC Symbol;Acc:VGNC:41024]
ENSCAFG00000013851	FYCO1	FYVE and coiled-coil domain containing 1 [Source:VGNC Symbol;Acc:VGNC:41026]
ENSCAFG00000014653	G6PC	glucose-6-phosphatase catalytic subunit [Source:VGNC Symbol;Acc:VGNC:41040]
ENSCAFG00000019598	G6PD	glucose-6-phosphate dehydrogenase [Source:VGNC Symbol;Acc:VGNC:41043]
ENSCAFG00000005589	GAA	glucosidase alpha, acid [Source:VGNC Symbol;Acc:VGNC:41044]
ENSCAFG00000001883	GABRA1	gamma-aminobutyric acid type A receptor alpha1 subunit [Source:VGNC Symbol;Acc:VGNC:41053]
ENSCAFG00000019161	GABRA3	gamma-aminobutyric acid type A receptor alpha3 subunit [Source:VGNC Symbol;Acc:VGNC:41055]
ENSCAFG00000017244	GABRA6	gamma-aminobutyric acid type A receptor alpha6 subunit [Source:HGNC Symbol;Acc:HGNC:4080]
ENSCAFG00000030702	GABRB3	gamma-aminobutyric acid type A receptor beta3 subunit [Source:VGNC Symbol;Acc:VGNC:41060]
ENSCAFG00000019374	GABRD	gamma-aminobutyric acid type A receptor delta subunit [Source:VGNC Symbol;Acc:VGNC:41061]
ENSCAFG00000017227	GABRG2	gamma-aminobutyric acid type A receptor gamma2 subunit [Source:VGNC Symbol;Acc:VGNC:41064]
ENSCAFG00000012560	GAD1	glutamate decarboxylase 1 [Source:VGNC Symbol;Acc:VGNC:41067]
ENSCAFG00000004299	GAD2	glutamate decarboxylase 2 [Source:VGNC Symbol;Acc:VGNC:41068]
ENSCAFG00000010772	GAL	galanin and GMAP prepropeptide [Source:VGNC Symbol;Acc:VGNC:41075]
ENSCAFG00000017337	GALC	galactosylceramidase [Source:VGNC Symbol;Acc:VGNC:41079]
ENSCAFG00000013155	GALE	UDP-galactose-4-epimerase [Source:VGNC Symbol;Acc:VGNC:41080]
ENSCAFG00000004914	GALK1	galactokinase 1 [Source:VGNC Symbol;Acc:VGNC:41081]
ENSCAFG00000001946	GALT	galactose-1-phosphate uridylyltransferase [Source:VGNC Symbol;Acc:VGNC:41103]
ENSCAFG00000019999	GAN	gigaxonin [Source:VGNC Symbol;Acc:VGNC:41105]
ENSCAFG00000010848	GAP43	growth associated protein 43 [Source:VGNC Symbol;Acc:VGNC:41108]
ENSCAFG00000003086	GARS	glycyl-tRNA synthetase [Source:VGNC Symbol;Acc:VGNC:41113]
ENSCAFG00000006421	GAS6	growth arrest specific 6 [Source:VGNC Symbol;Acc:VGNC:41118]
ENSCAFG00000017455	GAS7	growth arrest specific 7 [Source:VGNC Symbol;Acc:VGNC:41119]
ENSCAFG00000019802	GAS8	growth arrest specific 8 [Source:VGNC Symbol;Acc:VGNC:41120]
ENSCAFG00000004143	GATA2	GATA binding protein 2 [Source:VGNC Symbol;Acc:VGNC:41122]
ENSCAFG00000005019	GATA3	GATA binding protein 3 [Source:VGNC Symbol;Acc:VGNC:41123]
ENSCAFG00000029087	GATA4	Transcription factor GATA-4 [Source:UniProtKB/Swiss-Prot;Acc:Q0Q0E4]
ENSCAFG00000030614	GATAD1	GATA zinc finger domain containing 1 [Source:VGNC Symbol;Acc:VGNC:41125]
ENSCAFG00000013733	GATM	glycine amidinotransferase [Source:VGNC Symbol;Acc:VGNC:41129]
ENSCAFG00000016988	GBA	glucosylceramidase beta [Source:VGNC Symbol;Acc:VGNC:41130]
ENSCAFG00000007846	GBE1	1,4-alpha-glucan branching enzyme 1 [Source:VGNC Symbol;Acc:VGNC:41132]
ENSCAFG00000002949	GC	GC, vitamin D binding protein [Source:VGNC Symbol;Acc:VGNC:41136]
ENSCAFG00000010414	GCG	glucagon [Source:VGNC Symbol;Acc:VGNC:41143]
ENSCAFG00000005846	GCGR	glucagon receptor [Source:VGNC Symbol;Acc:VGNC:41144]
ENSCAFG00000014965	GCH1	GTP cyclohydrolase 1 [Source:VGNC Symbol;Acc:VGNC:41145]
ENSCAFG00000002944	GCK	glucokinase [Source:HGNC Symbol;Acc:HGNC:4195]
ENSCAFG00000005150	GCKR	glucokinase regulatory protein [Source:RefSeq peptide;Acc:NP_001273995]
ENSCAFG00000002288	GCLC	glutamate-cysteine ligase catalytic subunit [Source:VGNC Symbol;Acc:VGNC:41147]
ENSCAFG00000020126	GCLM	glutamate-cysteine ligase modifier subunit [Source:VGNC Symbol;Acc:VGNC:41148]
ENSCAFG00000002273	GCM1	glial cells missing homolog 1 [Source:VGNC Symbol;Acc:VGNC:41149]
ENSCAFG00000009680	GCNT2	glucosaminyl (N-acetyl) transferase 2, I-branching enzyme (I blood group) [Source:HGNC Symbol;Acc:HGNC:4204]
ENSCAFG00000008178	GDAP1	ganglioside induced differentiation associated protein 1 [Source:VGNC Symbol;Acc:VGNC:41155]
ENSCAFG00000014882	GDF15	growth differentiation factor 15 [Source:VGNC Symbol;Acc:VGNC:41160]
ENSCAFG00000016193	GDF2	growth differentiation factor 2 [Source:VGNC Symbol;Acc:VGNC:41161]
ENSCAFG00000032763	GDF3	growth differentiation factor 3 [Source:VGNC Symbol;Acc:VGNC:41162]
ENSCAFG00000008027	GDF5	growth differentiation factor 5 [Source:VGNC Symbol;Acc:VGNC:41163]
ENSCAFG00000009445	GDF6	growth differentiation factor 6 [Source:HGNC Symbol;Acc:HGNC:4221]
ENSCAFG00000013973	GFAP	Glial fibrillary acidic protein [Source:VGNC Symbol;Acc:VGNC:41180]
ENSCAFG00000003296	GFPT1	glutamine--fructose-6-phosphate transaminase 1 [Source:VGNC Symbol;Acc:VGNC:41187]
ENSCAFG00000007720	GGCX	gamma-glutamyl carboxylase [Source:VGNC Symbol;Acc:VGNC:41197]
ENSCAFG00000011303	GGPS1	geranylgeranyl diphosphate synthase 1 [Source:VGNC Symbol;Acc:VGNC:41201]
ENSCAFG00000012681	GH1	Somatotropin [Source:UniProtKB/Swiss-Prot;Acc:P33711]
ENSCAFG00000018579	GHR	growth hormone receptor [Source:VGNC Symbol;Acc:VGNC:41206]
ENSCAFG00000005129	GHRL	ghrelin and obestatin prepropeptide [Source:VGNC Symbol;Acc:VGNC:41209]
ENSCAFG00000015376	GHSR	growth hormone secretagogue receptor [Source:VGNC Symbol;Acc:VGNC:41210]
ENSCAFG00000019213	GIPC3	GIPC PDZ domain containing family member 3 [Source:VGNC Symbol;Acc:VGNC:41227]
ENSCAFG00000004405	GIPR	gastric inhibitory polypeptide receptor [Source:VGNC Symbol;Acc:VGNC:41228]
ENSCAFG00000000958	GJA1	gap junction protein alpha 1 [Source:VGNC Symbol;Acc:VGNC:41231]
ENSCAFG00000007321	GJA3	gap junction protein alpha 3 [Source:VGNC Symbol;Acc:VGNC:41233]
ENSCAFG00000003605	GJA4	gap junction protein alpha 4 [Source:VGNC Symbol;Acc:VGNC:41234]
ENSCAFG00000011071	GJA8	gap junction protein alpha 8 [Source:VGNC Symbol;Acc:VGNC:41236]
ENSCAFG00000017023	GJB1	gap junction protein beta 1 [Source:VGNC Symbol;Acc:VGNC:41237]
ENSCAFG00000029537	GJB2	gap junction protein beta 2 [Source:VGNC Symbol;Acc:VGNC:41238]
ENSCAFG00000003606	GJB3	gap junction protein beta 3 [Source:VGNC Symbol;Acc:VGNC:41239]
ENSCAFG00000007316	GJB6	gap junction protein beta 6 [Source:VGNC Symbol;Acc:VGNC:41242]
ENSCAFG00000008244	GJD2	gap junction protein delta 2 [Source:VGNC Symbol;Acc:VGNC:41244]
ENSCAFG00000004652	GLB1	galactosidase beta 1 [Source:VGNC Symbol;Acc:VGNC:41249]
ENSCAFG00000002246	GLCCI1	glucocorticoid induced 1 [Source:HGNC Symbol;Acc:HGNC:18713]
ENSCAFG00000003535	GLI3	GLI family zinc finger 3 [Source:VGNC Symbol;Acc:VGNC:41258]
ENSCAFG00000031499	GLIS3	GLIS family zinc finger 3 [Source:VGNC Symbol;Acc:VGNC:41263]
ENSCAFG00000029506	GLO1	glyoxalase I [Source:HGNC Symbol;Acc:HGNC:4323]
ENSCAFG00000001547	GLP1R	glucagon like peptide 1 receptor [Source:VGNC Symbol;Acc:VGNC:41266]
ENSCAFG00000007905	GLRX	glutaredoxin [Source:VGNC Symbol;Acc:VGNC:41273]
ENSCAFG00000023493	GLRX5	glutaredoxin 5 [Source:HGNC Symbol;Acc:HGNC:20134]
ENSCAFG00000013102	GLUL	Glutamine synthetase [Source:UniProtKB/Swiss-Prot;Acc:Q8HZM5]
ENSCAFG00000009212	GMDS	GDP-mannose 4,6-dehydratase [Source:HGNC Symbol;Acc:HGNC:4369]
ENSCAFG00000023755	GMPPB	GDP-mannose pyrophosphorylase B [Source:VGNC Symbol;Acc:VGNC:41293]
ENSCAFG00000010740	GNAI2	G protein subunit alpha i2 [Source:VGNC Symbol;Acc:VGNC:41302]
ENSCAFG00000001579	GNAQ	G protein subunit alpha q [Source:VGNC Symbol;Acc:VGNC:41306]
ENSCAFG00000023756	GNAS	guanine nucleotide-binding protein G(s) subunit alpha [Source:RefSeq peptide;Acc:NP_001003263]
ENSCAFG00000011335	GNB4	G protein subunit beta 4 [Source:VGNC Symbol;Acc:VGNC:41315]
ENSCAFG00000002304	GNE	glucosamine (UDP-N-acetyl)-2-epimerase/N-acetylmannosamine kinase [Source:HGNC Symbol;Acc:HGNC:23657]
ENSCAFG00000009466	GOT1	glutamic-oxaloacetic transaminase 1 [Source:VGNC Symbol;Acc:VGNC:41354]
ENSCAFG00000008357	GOT2	aspartate aminotransferase, mitochondrial [Source:RefSeq peptide;Acc:NP_001273953]
ENSCAFG00000012663	GPC1	glypican 1 [Source:HGNC Symbol;Acc:HGNC:4449]
ENSCAFG00000018864	GPC3	glypican 3 [Source:VGNC Symbol;Acc:VGNC:41373]
ENSCAFG00000018857	GPC4	glypican 4 [Source:VGNC Symbol;Acc:VGNC:41374]
ENSCAFG00000008288	GPD1	glycerol-3-phosphate dehydrogenase 1 [Source:VGNC Symbol;Acc:VGNC:41376]
ENSCAFG00000009231	GPD2	glycerol-3-phosphate dehydrogenase 2 [Source:VGNC Symbol;Acc:VGNC:41378]
ENSCAFG00000011781	GPER1	G protein-coupled estrogen receptor 1 [Source:VGNC Symbol;Acc:VGNC:41379]
ENSCAFG00000028810	GPIHBP1	glycosylphosphatidylinositol anchored high density lipoprotein binding protein 1 [Source:VGNC Symbol;Acc:VGNC:41382]
ENSCAFG00000002753	GPNMB	glycoprotein nmb [Source:VGNC Symbol;Acc:VGNC:41389]
ENSCAFG00000019572	GPR153	G protein-coupled receptor 153 [Source:HGNC Symbol;Acc:HGNC:23618]
ENSCAFG00000015316	GPR161	G protein-coupled receptor 161 [Source:VGNC Symbol;Acc:VGNC:41412]
ENSCAFG00000019880	GPSM2	G protein signaling modulator 2 [Source:VGNC Symbol;Acc:VGNC:41458]
ENSCAFG00000001648	GPT	glutamic--pyruvic transaminase [Source:VGNC Symbol;Acc:VGNC:41460]
ENSCAFG00000011495	GPX1	glutathione peroxidase 1 [Source:VGNC Symbol;Acc:VGNC:41461]
ENSCAFG00000031922	GPX3	glutathione peroxidase 3 [Source:VGNC Symbol;Acc:VGNC:41463]
ENSCAFG00000008210	GREM1	gremlin 1, DAN family BMP antagonist [Source:VGNC Symbol;Acc:VGNC:41474]
ENSCAFG00000000587	GRHL2	grainyhead like transcription factor 2 [Source:VGNC Symbol;Acc:VGNC:41477]
ENSCAFG00000024991	GRID2	glutamate ionotropic receptor delta type subunit 2 [Source:VGNC Symbol;Acc:VGNC:41484]
ENSCAFG00000019499	GRIN1	glutamate ionotropic receptor NMDA type subunit 1 [Source:VGNC Symbol;Acc:VGNC:41491]
ENSCAFG00000018970	GRIN2A	glutamate ionotropic receptor NMDA type subunit 2A [Source:VGNC Symbol;Acc:VGNC:41492]
ENSCAFG00000013148	GRIN2B	glutamate ionotropic receptor NMDA type subunit 2B [Source:VGNC Symbol;Acc:VGNC:41493]
ENSCAFG00000001202	GRM4	glutamate metabotropic receptor 4 [Source:VGNC Symbol;Acc:VGNC:41511]
ENSCAFG00000014165	GRN	granulin precursor [Source:VGNC Symbol;Acc:VGNC:41516]
ENSCAFG00000024975	GRXCR1	glutaredoxin and cysteine rich domain containing 1 [Source:VGNC Symbol;Acc:VGNC:41522]
ENSCAFG00000023537	GRXCR2	glutaredoxin and cysteine rich domain containing 2 [Source:VGNC Symbol;Acc:VGNC:41523]
ENSCAFG00000002825	GSDME	gasdermin E [Source:VGNC Symbol;Acc:VGNC:39911]
ENSCAFG00000011122	GSK3B	glycogen synthase kinase 3 beta [Source:VGNC Symbol;Acc:VGNC:41530]
ENSCAFG00000024066	GSTA4	N/A
ENSCAFG00000011349	GSTP1	N/A
ENSCAFG00000015378	GTPBP3	GTP binding protein 3, mitochondrial [Source:HGNC Symbol;Acc:HGNC:14880]
ENSCAFG00000008527	GUCY1A3	guanylate cyclase 1 soluble subunit alpha [Source:VGNC Symbol;Acc:VGNC:41567]
ENSCAFG00000003858	GYS1	glycogen synthase 1 [Source:VGNC Symbol;Acc:VGNC:41574]
ENSCAFG00000025287	GZMB	granzyme B [Source:HGNC Symbol;Acc:HGNC:4709]
ENSCAFG00000019727	H6PD	hexose-6-phosphate dehydrogenase/glucose 1-dehydrogenase [Source:VGNC Symbol;Acc:VGNC:41579]
ENSCAFG00000011016	HABP2	hyaluronan binding protein 2 [Source:HGNC Symbol;Acc:HGNC:4798]
ENSCAFG00000007048	HAMP	hepcidin antimicrobial peptide [Source:VGNC Symbol;Acc:VGNC:41588]
ENSCAFG00000017641	HAND1	heart and neural crest derivatives expressed 1 [Source:VGNC Symbol;Acc:VGNC:41589]
ENSCAFG00000009186	HARBI1	harbinger transposase derived 1 [Source:VGNC Symbol;Acc:VGNC:41596]
ENSCAFG00000023455	HAVCR1	N/A
ENSCAFG00000011591	HCCS	holocytochrome c synthase [Source:VGNC Symbol;Acc:VGNC:41614]
ENSCAFG00000018508	HCN1	hyperpolarization activated cyclic nucleotide gated potassium channel 1 [Source:VGNC Symbol;Acc:VGNC:41620]
ENSCAFG00000031809	HCN4	hyperpolarization activated cyclic nucleotide gated potassium channel 4 [Source:HGNC Symbol;Acc:HGNC:16882]
ENSCAFG00000015615	HCRT	hypocretin neuropeptide precursor [Source:VGNC Symbol;Acc:VGNC:41622]
ENSCAFG00000010968	HCRTR1	hypocretin receptor 1 [Source:VGNC Symbol;Acc:VGNC:41623]
ENSCAFG00000004049	HDAC2	histone deacetylase 2 [Source:HGNC Symbol;Acc:HGNC:4853]
ENSCAFG00000006173	HDAC3	histone deacetylase 3 [Source:HGNC Symbol;Acc:HGNC:4854]
ENSCAFG00000015620	HDAC6	histone deacetylase 6 [Source:HGNC Symbol;Acc:HGNC:14064]
ENSCAFG00000007995	HESX1	HESX homeobox 1 [Source:VGNC Symbol;Acc:VGNC:41668]
ENSCAFG00000008292	HEXB	hexosaminidase subunit beta [Source:VGNC Symbol;Acc:VGNC:41669]
ENSCAFG00000010925	HFE	hemochromatosis [Source:VGNC Symbol;Acc:VGNC:41671]
ENSCAFG00000011418	HFE2	hemochromatosis type 2 (juvenile) [Source:HGNC Symbol;Acc:HGNC:4887]
ENSCAFG00000006370	HGF	hepatocyte growth factor [Source:VGNC Symbol;Acc:VGNC:41674]
ENSCAFG00000007502	HHEX	hematopoietically expressed homeobox [Source:VGNC Symbol;Acc:VGNC:41680]
ENSCAFG00000013627	HHIPL2	HHIP like 2 [Source:HGNC Symbol;Acc:HGNC:25842]
ENSCAFG00000015718	HIF1A	hypoxia inducible factor 1 alpha subunit [Source:VGNC Symbol;Acc:VGNC:41686]
ENSCAFG00000013367	HIP1	huntingtin interacting protein 1 [Source:VGNC Symbol;Acc:VGNC:41691]
ENSCAFG00000032754	HKDC1	hexokinase domain containing 1 [Source:VGNC Symbol;Acc:VGNC:41701]
ENSCAFG00000000806	HLA-DRB1	DLA class II histocompatibility antigen, DR-1 beta chain precursor [Source:RefSeq peptide;Acc:NP_001014768]
ENSCAFG00000001211	HMGA1	high mobility group AT-hook 1 [Source:VGNC Symbol;Acc:VGNC:41709]
ENSCAFG00000028715	HMGB3	high mobility group box 3 [Source:HGNC Symbol;Acc:HGNC:5004]
ENSCAFG00000001711	HMOX1	heme oxygenase 1 [Source:VGNC Symbol;Acc:VGNC:41719]
ENSCAFG00000019207	HMOX2	heme oxygenase 2 [Source:VGNC Symbol;Acc:VGNC:41720]
ENSCAFG00000010502	HNF1A	HNF1 homeobox A [Source:VGNC Symbol;Acc:VGNC:41723]
ENSCAFG00000018150	HNF1B	HNF1 homeobox B [Source:VGNC Symbol;Acc:VGNC:41724]
ENSCAFG00000009411	HNF4A	hepatocyte nuclear factor 4 alpha [Source:VGNC Symbol;Acc:VGNC:41725]
ENSCAFG00000005178	HNMT	histamine N-methyltransferase [Source:HGNC Symbol;Acc:HGNC:5028]
ENSCAFG00000008940	HNRNPDL	heterogeneous nuclear ribonucleoprotein D like [Source:VGNC Symbol;Acc:VGNC:41729]
ENSCAFG00000009205	HOGA1	4-hydroxy-2-oxoglutarate aldolase 1 [Source:VGNC Symbol;Acc:VGNC:41736]
ENSCAFG00000013174	HOMER2	homer scaffolding protein 2 [Source:HGNC Symbol;Acc:HGNC:17513]
ENSCAFG00000031330	HOPX	HOP homeobox [Source:VGNC Symbol;Acc:VGNC:41743]
ENSCAFG00000002936	HOXA1	homeobox A1 [Source:VGNC Symbol;Acc:VGNC:41744]
ENSCAFG00000002950	HOXA5	homeobox A5 [Source:HGNC Symbol;Acc:HGNC:5106]
ENSCAFG00000016855	HOXB7	homeobox B7 [Source:VGNC Symbol;Acc:VGNC:41753]
ENSCAFG00000006648	HOXC13	homeobox C13 [Source:VGNC Symbol;Acc:VGNC:41758]
ENSCAFG00000009094	HPSE	heparanase [Source:VGNC Symbol;Acc:VGNC:41779]
ENSCAFG00000031029	HRAS	HRas proto-oncogene, GTPase [Source:HGNC Symbol;Acc:HGNC:5173]
ENSCAFG00000005023	HRH1	histamine receptor H1 [Source:VGNC Symbol;Acc:VGNC:41786]
ENSCAFG00000018162	HRH4	histamine receptor H4 [Source:VGNC Symbol;Acc:VGNC:41788]
ENSCAFG00000011925	HSD11B1	hydroxysteroid 11-beta dehydrogenase 1 [Source:VGNC Symbol;Acc:VGNC:41797]
ENSCAFG00000020362	HSD11B2	hydroxysteroid 11-beta dehydrogenase 2 [Source:VGNC Symbol;Acc:VGNC:41799]
ENSCAFG00000020379	HSF4	heat shock factor protein 4 [Source:RefSeq peptide;Acc:NP_001041586]
ENSCAFG00000018036	HSP90AA1	heat shock protein 90 alpha family class A member 1 [Source:HGNC Symbol;Acc:HGNC:5253]
ENSCAFG00000000948	HSPA4	heat shock protein family A (Hsp70) member 4 [Source:HGNC Symbol;Acc:HGNC:5237]
ENSCAFG00000020196	HSPA5	heat shock protein family A (Hsp70) member 5 [Source:HGNC Symbol;Acc:HGNC:5238]
ENSCAFG00000013544	HSPB1	heat shock protein family B (small) member 1 [Source:HGNC Symbol;Acc:HGNC:5246]
ENSCAFG00000018389	HSPB3	heat shock protein family B (small) member 3 [Source:HGNC Symbol;Acc:HGNC:5248]
ENSCAFG00000030537	HSPB8	heat shock protein family B (small) member 8 [Source:HGNC Symbol;Acc:HGNC:30171]
ENSCAFG00000010865	HSPD1	Heat shock protein family D (Hsp60) member 1 [Source:NCBI gene;Acc:478854]
ENSCAFG00000014773	HSPG2	heparan sulfate proteoglycan 2 [Source:VGNC Symbol;Acc:VGNC:41820]
ENSCAFG00000007276	HTR1A	5-hydroxytryptamine receptor 1A [Source:VGNC Symbol;Acc:VGNC:41823]
ENSCAFG00000010964	HTR2B	5-hydroxytryptamine receptor 2B [Source:VGNC Symbol;Acc:VGNC:41827]
ENSCAFG00000012141	HTR3C	5-hydroxytryptamine receptor 3C [Source:HGNC Symbol;Acc:HGNC:24003]
ENSCAFG00000014682	HTT	huntingtin [Source:VGNC Symbol;Acc:VGNC:41839]
ENSCAFG00000020167	HYDIN	HYDIN, axonemal central pair apparatus protein [Source:HGNC Symbol;Acc:HGNC:19368]
ENSCAFG00000029872	IAPP	islet amyloid polypeptide [Source:VGNC Symbol;Acc:VGNC:41848]
ENSCAFG00000010952	IARS2	isoleucyl-tRNA synthetase 2, mitochondrial [Source:VGNC Symbol;Acc:VGNC:41850]
ENSCAFG00000002257	ICA1	islet cell autoantigen 1 [Source:VGNC Symbol;Acc:VGNC:41854]
ENSCAFG00000031460	ICAM1	intercellular adhesion molecule 1 [Source:VGNC Symbol;Acc:VGNC:41856]
ENSCAFG00000012880	ICOS	inducible T-cell costimulator [Source:VGNC Symbol;Acc:VGNC:41861]
ENSCAFG00000007467	IDE	Canis lupus familiaris insulin degrading enzyme (IDE), mRNA. [Source:RefSeq mRNA;Acc:NM_001314100]
ENSCAFG00000005750	IDO1	indoleamine 2,3-dioxygenase 1 [Source:VGNC Symbol;Acc:VGNC:41865]
ENSCAFG00000010438	IFIH1	interferon induced with helicase C domain 1 [Source:VGNC Symbol;Acc:VGNC:41876]
ENSCAFG00000000408	IFNG	interferon gamma [Source:VGNC Symbol;Acc:VGNC:41879]
ENSCAFG00000000260	IFNGR1	interferon gamma receptor 1 [Source:VGNC Symbol;Acc:VGNC:41880]
ENSCAFG00000001716	IFNK	interferon kappa [Source:HGNC Symbol;Acc:HGNC:21714]
ENSCAFG00000007304	IGF1	insulin like growth factor 1 [Source:VGNC Symbol;Acc:VGNC:41895]
ENSCAFG00000010881	IGF1R	insulin like growth factor 1 receptor [Source:VGNC Symbol;Acc:VGNC:41896]
ENSCAFG00000010090	IGF2	insulin like growth factor 2 [Source:VGNC Symbol;Acc:VGNC:41897]
ENSCAFG00000013297	IGF2BP2	insulin like growth factor 2 mRNA binding protein 2 [Source:VGNC Symbol;Acc:VGNC:41899]
ENSCAFG00000012272	IGFBP1	insulin like growth factor binding protein 1 [Source:VGNC Symbol;Acc:VGNC:41902]
ENSCAFG00000014490	IGFBP2	insulin like growth factor binding protein 2 [Source:VGNC Symbol;Acc:VGNC:41903]
ENSCAFG00000012294	IGFBP3	insulin like growth factor binding protein 3 [Source:VGNC Symbol;Acc:VGNC:41904]
ENSCAFG00000016071	IGFBP4	insulin like growth factor binding protein 4 [Source:VGNC Symbol;Acc:VGNC:41905]
ENSCAFG00000002330	IGFBP7	insulin like growth factor binding protein 7 [Source:VGNC Symbol;Acc:VGNC:41908]
ENSCAFG00000010745	IGHMBP2	immunoglobulin mu binding protein 2 [Source:VGNC Symbol;Acc:VGNC:41910]
ENSCAFG00000018799	IGSF1	immunoglobulin superfamily member 1 [Source:VGNC Symbol;Acc:VGNC:41912]
ENSCAFG00000005526	IKBKB	inhibitor of nuclear factor kappa B kinase subunit beta [Source:HGNC Symbol;Acc:HGNC:5960]
ENSCAFG00000019605	IKBKG	inhibitor of nuclear factor kappa B kinase subunit gamma [Source:VGNC Symbol;Acc:VGNC:41922]
ENSCAFG00000011443	IL10	interleukin 10 [Source:VGNC Symbol;Acc:VGNC:41928]
ENSCAFG00000014200	IL12A	interleukin 12A [Source:VGNC Symbol;Acc:VGNC:41932]
ENSCAFG00000017287	IL12B	interleukin 12B [Source:VGNC Symbol;Acc:VGNC:41933]
ENSCAFG00000015028	IL12RB1	interleukin 12 receptor subunit beta 1 [Source:VGNC Symbol;Acc:VGNC:41934]
ENSCAFG00000018539	IL12RB2	interleukin 12 receptor subunit beta 2 [Source:VGNC Symbol;Acc:VGNC:41935]
ENSCAFG00000000878	IL13	interleukin 13 [Source:VGNC Symbol;Acc:VGNC:41936]
ENSCAFG00000018359	IL13RA1	interleukin 13 receptor subunit alpha 1 [Source:VGNC Symbol;Acc:VGNC:41937]
ENSCAFG00000018230	IL13RA2	interleukin 13 receptor subunit alpha 2 [Source:VGNC Symbol;Acc:VGNC:41938]
ENSCAFG00000013833	IL16	interleukin 16 [Source:VGNC Symbol;Acc:VGNC:41941]
ENSCAFG00000028874	IL17A	interleukin 17A [Source:VGNC Symbol;Acc:VGNC:41942]
ENSCAFG00000002183	IL17F	interleukin 17F [Source:VGNC Symbol;Acc:VGNC:41945]
ENSCAFG00000008023	IL17RD	interleukin 17 receptor D [Source:VGNC Symbol;Acc:VGNC:41949]
ENSCAFG00000030180	IL18	interleukin 18 [Source:VGNC Symbol;Acc:VGNC:41951]
ENSCAFG00000002138	IL18R1	interleukin 18 receptor 1 [Source:VGNC Symbol;Acc:VGNC:41953]
ENSCAFG00000002134	IL18RAP	interleukin 18 receptor accessory protein [Source:VGNC Symbol;Acc:VGNC:41954]
ENSCAFG00000011450	IL19	interleukin 19 [Source:VGNC Symbol;Acc:VGNC:41955]
ENSCAFG00000007245	IL1A	interleukin 1 alpha [Source:VGNC Symbol;Acc:VGNC:41956]
ENSCAFG00000007249	IL1B	interleukin 1 beta [Source:VGNC Symbol;Acc:VGNC:41957]
ENSCAFG00000002147	IL1R1	interleukin 1 receptor type 1 [Source:VGNC Symbol;Acc:VGNC:41958]
ENSCAFG00000002152	IL1R2	interleukin 1 receptor type 2 [Source:VGNC Symbol;Acc:VGNC:41959]
ENSCAFG00000002142	IL1RL1	interleukin 1 receptor like 1 [Source:VGNC Symbol;Acc:VGNC:41961]
ENSCAFG00000007277	IL1RN	interleukin 1 receptor antagonist [Source:VGNC Symbol;Acc:VGNC:41962]
ENSCAFG00000011459	IL20	interleukin 20 [Source:VGNC Symbol;Acc:VGNC:41964]
ENSCAFG00000004004	IL21	interleukin 21 [Source:VGNC Symbol;Acc:VGNC:41967]
ENSCAFG00000000410	IL22	interleukin 22 [Source:VGNC Symbol;Acc:VGNC:41969]
ENSCAFG00000000120	IL23A	interleukin 23 subunit alpha [Source:VGNC Symbol;Acc:VGNC:41972]
ENSCAFG00000018542	IL23R	interleukin 23 receptor [Source:VGNC Symbol;Acc:VGNC:41973]
ENSCAFG00000011610	IL25	interleukin 25 [Source:VGNC Symbol;Acc:VGNC:41975]
ENSCAFG00000017132	IL27	interleukin 27 [Source:VGNC Symbol;Acc:VGNC:41976]
ENSCAFG00000011481	IL29L	N/A
ENSCAFG00000005210	IL2RA	interleukin 2 receptor subunit alpha [Source:VGNC Symbol;Acc:VGNC:41977]
ENSCAFG00000001511	IL2RB	Canis lupus familiaris interleukin 2 receptor subunit beta (IL2RB), transcript variant 2, mRNA. [Source:RefSeq mRNA;Acc:NM_001286850]
ENSCAFG00000030113	IL31	interleukin 31 [Source:VGNC Symbol;Acc:VGNC:41980]
ENSCAFG00000006888	IL31RA	interleukin 31 receptor A [Source:VGNC Symbol;Acc:VGNC:41981]
ENSCAFG00000030105	IL33	interleukin 33 [Source:VGNC Symbol;Acc:VGNC:41982]
ENSCAFG00000007263	IL37	interleukin 37 [Source:VGNC Symbol;Acc:VGNC:41986]
ENSCAFG00000000880	IL4	interleukin 4 [Source:VGNC Symbol;Acc:VGNC:41987]
ENSCAFG00000017447	IL4R	interleukin 4 receptor [Source:VGNC Symbol;Acc:VGNC:41989]
ENSCAFG00000000855	IL5	interleukin 5 [Source:VGNC Symbol;Acc:VGNC:41990]
ENSCAFG00000002733	IL6	interleukin 6 [Source:VGNC Symbol;Acc:VGNC:41992]
ENSCAFG00000018752	IL7R	interleukin 7 receptor [Source:VGNC Symbol;Acc:VGNC:41996]
ENSCAFG00000011730	ILDR1	immunoglobulin like domain containing receptor 1 [Source:VGNC Symbol;Acc:VGNC:41997]
ENSCAFG00000017691	ILF3	interleukin enhancer binding factor 3 [Source:VGNC Symbol;Acc:VGNC:42000]
ENSCAFG00000006488	ILK	integrin linked kinase [Source:VGNC Symbol;Acc:VGNC:42001]
ENSCAFG00000007514	IMMP1L	inner mitochondrial membrane peptidase subunit 1 [Source:VGNC Symbol;Acc:VGNC:42004]
ENSCAFG00000011933	IMPDH2	inosine monophosphate dehydrogenase 2 [Source:VGNC Symbol;Acc:VGNC:42011]
ENSCAFG00000003550	INHBA	inhibin beta A subunit [Source:VGNC Symbol;Acc:VGNC:42021]
ENSCAFG00000004840	INHBB	inhibin beta B subunit [Source:VGNC Symbol;Acc:VGNC:42022]
ENSCAFG00000019181	INPP5K	inositol polyphosphate-5-phosphatase K [Source:VGNC Symbol;Acc:VGNC:42036]
ENSCAFG00000005743	INPPL1	inositol polyphosphate phosphatase like 1 [Source:VGNC Symbol;Acc:VGNC:42037]
ENSCAFG00000010092	INS	Insulin Insulin B chain Insulin A chain [Source:UniProtKB/Swiss-Prot;Acc:P01321]
ENSCAFG00000018170	INSR	insulin receptor [Source:VGNC Symbol;Acc:VGNC:42043]
ENSCAFG00000011226	IP6K1	inositol hexakisphosphate kinase 1 [Source:VGNC Symbol;Acc:VGNC:42061]
ENSCAFG00000007842	IQCM	IQ motif containing M [Source:HGNC Symbol;Acc:HGNC:53443]
ENSCAFG00000019436	IRAK1	interleukin 1 receptor associated kinase 1 [Source:VGNC Symbol;Acc:VGNC:42087]
ENSCAFG00000009700	IRAK4	interleukin 1 receptor associated kinase 4 [Source:VGNC Symbol;Acc:VGNC:42089]
ENSCAFG00000009156	IRF4	interferon regulatory factor 4 [Source:HGNC Symbol;Acc:HGNC:6119]
ENSCAFG00000010397	IRS1	insulin receptor substrate 1 [Source:HGNC Symbol;Acc:HGNC:6125]
ENSCAFG00000006058	IRS2	insulin receptor substrate 2 [Source:VGNC Symbol;Acc:VGNC:42099]
ENSCAFG00000011324	ISCU	iron-sulfur cluster assembly enzyme [Source:VGNC Symbol;Acc:VGNC:42105]
ENSCAFG00000018449	ISL1	ISL LIM homeobox 1 [Source:VGNC Symbol;Acc:VGNC:42109]
ENSCAFG00000031802	ISPD	isoprenoid synthase domain containing [Source:VGNC Symbol;Acc:VGNC:42114]
ENSCAFG00000018439	ITGA1	integrin subunit alpha 1 [Source:VGNC Symbol;Acc:VGNC:42120]
ENSCAFG00000018423	ITGA2	integrin subunit alpha 2 [Source:VGNC Symbol;Acc:VGNC:42123]
ENSCAFG00000013006	ITGA6	integrin subunit alpha 6 [Source:VGNC Symbol;Acc:VGNC:42128]
ENSCAFG00000000060	ITGA7	integrin subunit alpha 7 [Source:VGNC Symbol;Acc:VGNC:42129]
ENSCAFG00000016603	ITGAL	integrin subunit alpha L [Source:VGNC Symbol;Acc:VGNC:42132]
ENSCAFG00000016881	ITGAM	integrin subunit alpha M [Source:VGNC Symbol;Acc:VGNC:42133]
ENSCAFG00000014597	ITGAV	integrin subunit alpha V [Source:VGNC Symbol;Acc:VGNC:42134]
ENSCAFG00000003821	ITGB1	integrin subunit beta 1 [Source:VGNC Symbol;Acc:VGNC:42136]
ENSCAFG00000017081	ITGB1BP2	integrin subunit beta 1 binding protein 2 [Source:VGNC Symbol;Acc:VGNC:42138]
ENSCAFG00000011039	ITGB2	integrin subunit beta 2 [Source:VGNC Symbol;Acc:VGNC:42139]
ENSCAFG00000008867	ITIH1	inter-alpha-trypsin inhibitor heavy chain 1 [Source:VGNC Symbol;Acc:VGNC:42145]
ENSCAFG00000025533	ITIH4	inter-alpha-trypsin inhibitor heavy chain family member 4 [Source:VGNC Symbol;Acc:VGNC:42147]
ENSCAFG00000023463	ITPR1	inositol 1,4,5-trisphosphate receptor type 1 [Source:VGNC Symbol;Acc:VGNC:42157]
ENSCAFG00000011345	ITPR2	inositol 1,4,5-trisphosphate receptor type 2 [Source:VGNC Symbol;Acc:VGNC:42158]
ENSCAFG00000001130	ITPR3	inositol 1,4,5-trisphosphate receptor type 3 [Source:VGNC Symbol;Acc:VGNC:42159]
ENSCAFG00000000404	IYD	iodotyrosine deiodinase [Source:VGNC Symbol;Acc:VGNC:42164]
ENSCAFG00000005627	JAG1	jagged 1 [Source:VGNC Symbol;Acc:VGNC:42172]
ENSCAFG00000018615	JAK1	Janus kinase 1 [Source:VGNC Symbol;Acc:VGNC:42175]
ENSCAFG00000002102	JAK2	Janus kinase 2 [Source:VGNC Symbol;Acc:VGNC:42176]
ENSCAFG00000009885	JARID2	jumonji and AT-rich interaction domain containing 2 [Source:VGNC Symbol;Acc:VGNC:42181]
ENSCAFG00000003001	JAZF1	JAZF zinc finger 1 [Source:VGNC Symbol;Acc:VGNC:42182]
ENSCAFG00000013708	KANSL1	KAT8 regulatory NSL complex subunit 1 [Source:HGNC Symbol;Acc:HGNC:24565]
ENSCAFG00000020069	KARS	lysyl-tRNA synthetase [Source:VGNC Symbol;Acc:VGNC:42207]
ENSCAFG00000005450	KAT14	lysine acetyltransferase 14 [Source:VGNC Symbol;Acc:VGNC:42208]
ENSCAFG00000019777	KCNA2	potassium voltage-gated channel subfamily A member 2 [Source:VGNC Symbol;Acc:VGNC:42229]
ENSCAFG00000023296	KCNA3	potassium voltage-gated channel subfamily A member 3 [Source:VGNC Symbol;Acc:VGNC:42230]
ENSCAFG00000008838	KCNAB1	potassium voltage-gated channel subfamily A member regulatory beta subunit 1 [Source:VGNC Symbol;Acc:VGNC:42233]
ENSCAFG00000009549	KCNE2	potassium voltage-gated channel subfamily E regulatory subunit 2 [Source:VGNC Symbol;Acc:VGNC:42241]
ENSCAFG00000025442	KCNH2	potassium voltage-gated channel subfamily H member 2 [Source:VGNC Symbol;Acc:VGNC:42248]
ENSCAFG00000010259	KCNJ1	potassium voltage-gated channel subfamily J member 1 [Source:VGNC Symbol;Acc:VGNC:42258]
ENSCAFG00000008730	KCNJ11	potassium voltage-gated channel subfamily J member 11 [Source:VGNC Symbol;Acc:VGNC:42259]
ENSCAFG00000018532	KCNJ12	N/A
ENSCAFG00000011577	KCNJ13	potassium voltage-gated channel subfamily J member 13 [Source:VGNC Symbol;Acc:VGNC:42260]
ENSCAFG00000010736	KCNJ2	potassium voltage-gated channel subfamily J member 2 [Source:VGNC Symbol;Acc:VGNC:42263]
ENSCAFG00000009183	KCNJ3	potassium voltage-gated channel subfamily J member 3 [Source:VGNC Symbol;Acc:VGNC:42264]
ENSCAFG00000010255	KCNJ5	potassium voltage-gated channel subfamily J member 5 [Source:VGNC Symbol;Acc:VGNC:42266]
ENSCAFG00000023367	KCNK3	potassium two pore domain channel subfamily K member 3 [Source:VGNC Symbol;Acc:VGNC:42275]
ENSCAFG00000016956	KCNMB1	potassium calcium-activated channel subfamily M regulatory beta subunit 1 [Source:VGNC Symbol;Acc:VGNC:42282]
ENSCAFG00000011271	KCNMB3	potassium calcium-activated channel subfamily M regulatory beta subunit 3 [Source:VGNC Symbol;Acc:VGNC:42283]
ENSCAFG00000017167	KCNN3	potassium calcium-activated channel subfamily N member 3 [Source:VGNC Symbol;Acc:VGNC:42286]
ENSCAFG00000010231	KCNQ1	potassium voltage-gated channel subfamily Q member 1 [Source:HGNC Symbol;Acc:HGNC:6294]
ENSCAFG00000012931	KCNQ2	potassium voltage-gated channel subfamily Q member 2 [Source:VGNC Symbol;Acc:VGNC:42288]
ENSCAFG00000001105	KCNQ3	potassium voltage-gated channel subfamily Q member 3 [Source:VGNC Symbol;Acc:VGNC:42289]
ENSCAFG00000002814	KCNQ4	potassium voltage-gated channel subfamily Q member 4 [Source:VGNC Symbol;Acc:VGNC:42290]
ENSCAFG00000004903	KDM4A	lysine demethylase 4A [Source:VGNC Symbol;Acc:VGNC:42324]
ENSCAFG00000018925	KDM4B	lysine demethylase 4B [Source:VGNC Symbol;Acc:VGNC:42325]
ENSCAFG00000010452	KDM5B	lysine demethylase 5B [Source:VGNC Symbol;Acc:VGNC:42328]
ENSCAFG00000002079	KDR	kinase insert domain receptor [Source:VGNC Symbol;Acc:VGNC:42331]
ENSCAFG00000017784	KEAP1	kelch like ECH associated protein 1 [Source:VGNC Symbol;Acc:VGNC:42332]
ENSCAFG00000006134	KERA	keratocan [Source:VGNC Symbol;Acc:VGNC:42334]
ENSCAFG00000019785	KIF1B	kinesin family member 1B [Source:VGNC Symbol;Acc:VGNC:42391]
ENSCAFG00000000898	KIF3A	kinesin family member 3A [Source:VGNC Symbol;Acc:VGNC:42404]
ENSCAFG00000000238	KIF5A	kinesin family member 5A [Source:VGNC Symbol;Acc:VGNC:42407]
ENSCAFG00000001560	KIF6	kinesin family member 6 [Source:VGNC Symbol;Acc:VGNC:42410]
ENSCAFG00000006091	KITLG	KIT ligand [Source:VGNC Symbol;Acc:VGNC:42423]
ENSCAFG00000006322	KL	klotho [Source:VGNC Symbol;Acc:VGNC:42425]
ENSCAFG00000016022	KLB	klotho beta [Source:VGNC Symbol;Acc:VGNC:42426]
ENSCAFG00000000638	KLF10	Kruppel like factor 10 [Source:VGNC Symbol;Acc:VGNC:42431]
ENSCAFG00000003405	KLF11	Kruppel like factor 11 [Source:HGNC Symbol;Acc:HGNC:11811]
ENSCAFG00000011693	KLHDC8B	kelch domain containing 8B [Source:VGNC Symbol;Acc:VGNC:42444]
ENSCAFG00000005343	KLHL40	kelch like family member 40 [Source:HGNC Symbol;Acc:HGNC:30372]
ENSCAFG00000002907	KLK2	arginine esterase precursor [Source:RefSeq peptide;Acc:NP_001003284]
ENSCAFG00000011428	KRAS	KRAS proto-oncogene, GTPase [Source:VGNC Symbol;Acc:VGNC:42508]
ENSCAFG00000011994	KREMEN1	kringle containing transmembrane protein 1 [Source:VGNC Symbol;Acc:VGNC:42511]
ENSCAFG00000016004	KRT12	keratin 12 [Source:VGNC Symbol;Acc:VGNC:42517]
ENSCAFG00000007595	KRT17	keratin 17 [Source:HGNC Symbol;Acc:HGNC:6427]
ENSCAFG00000007322	KRT3	keratin 3 [Source:VGNC Symbol;Acc:VGNC:42525]
ENSCAFG00000018588	L3MBTL4	L3MBTL4, histone methyl-lysine binding protein [Source:HGNC Symbol;Acc:HGNC:26677]
ENSCAFG00000018597	LAMA1	laminin subunit alpha 1 [Source:VGNC Symbol;Acc:VGNC:42564]
ENSCAFG00000001106	LAMA2	laminin subunit alpha 2 [Source:VGNC Symbol;Acc:VGNC:42565]
ENSCAFG00000018173	LAMA3	laminin subunit alpha 3 [Source:VGNC Symbol;Acc:VGNC:42566]
ENSCAFG00000004043	LAMA4	laminin subunit alpha 4 [Source:HGNC Symbol;Acc:HGNC:6484]
ENSCAFG00000011913	LAMB3	laminin subunit beta 3 [Source:VGNC Symbol;Acc:VGNC:42569]
ENSCAFG00000018510	LAMP2	lysosomal associated membrane protein 2 [Source:VGNC Symbol;Acc:VGNC:42575]
ENSCAFG00000001740	LARGE1	LARGE xylosyl- and glucuronyltransferase 1 [Source:VGNC Symbol;Acc:VGNC:42585]
ENSCAFG00000020332	LCAT	lecithin-cholesterol acyltransferase [Source:VGNC Symbol;Acc:VGNC:42606]
ENSCAFG00000030771	LCLAT1	lysocardiolipin acyltransferase 1 [Source:VGNC Symbol;Acc:VGNC:42608]
ENSCAFG00000020088	LCN2	lipocalin 2 [Source:VGNC Symbol;Acc:VGNC:42612]
ENSCAFG00000005126	LCT	lactase [Source:VGNC Symbol;Acc:VGNC:42616]
ENSCAFG00000016038	LDB3	LIM domain binding 3 [Source:VGNC Symbol;Acc:VGNC:42620]
ENSCAFG00000017539	LDLR	low density lipoprotein receptor [Source:VGNC Symbol;Acc:VGNC:42622]
ENSCAFG00000011252	LEF1	lymphoid enhancer binding factor 1 [Source:VGNC Symbol;Acc:VGNC:42630]
ENSCAFG00000001191	LEMD2	LEM domain containing 2 [Source:VGNC Symbol;Acc:VGNC:42632]
ENSCAFG00000001672	LEP	leptin [Source:VGNC Symbol;Acc:VGNC:42637]
ENSCAFG00000018600	LEPR	leptin receptor [Source:VGNC Symbol;Acc:VGNC:42638]
ENSCAFG00000015013	LGALS3	galectin 3 [Source:VGNC Symbol;Acc:VGNC:42648]
ENSCAFG00000007949	LGI1	leucine rich glioma inactivated 1 [Source:HGNC Symbol;Acc:HGNC:6572]
ENSCAFG00000016480	LGI2	Leucine rich repeat LGI family member 2 [Source:VGNC Symbol;Acc:VGNC:49726]
ENSCAFG00000007111	LGI4	leucine rich repeat LGI family member 4 [Source:VGNC Symbol;Acc:VGNC:42653]
ENSCAFG00000010995	LGMN	legumain [Source:VGNC Symbol;Acc:VGNC:42654]
ENSCAFG00000010188	LGR4	leucine rich repeat containing G protein-coupled receptor 4 [Source:VGNC Symbol;Acc:VGNC:42655]
ENSCAFG00000002482	LGSN	lengsin, lens protein with glutamine synthetase domain [Source:VGNC Symbol;Acc:VGNC:42656]
ENSCAFG00000018215	LHFPL1	LHFPL tetraspan subfamily member 1 [Source:VGNC Symbol;Acc:VGNC:42657]
ENSCAFG00000032175	LHFPL2	LHFPL tetraspan subfamily member 2 [Source:VGNC Symbol;Acc:VGNC:42658]
ENSCAFG00000029592	LHFPL4	LHFPL tetraspan subfamily member 4 [Source:VGNC Symbol;Acc:VGNC:42659]
ENSCAFG00000001351	LHFPL5	LHFPL tetraspan subfamily member 5 [Source:VGNC Symbol;Acc:VGNC:42660]
ENSCAFG00000005998	LHFPL6	LHFPL tetraspan subfamily member 6 [Source:HGNC Symbol;Acc:HGNC:6586]
ENSCAFG00000018330	LIG3	DNA ligase 3 [Source:VGNC Symbol;Acc:VGNC:42674]
ENSCAFG00000002844	LIM2	lens intrinsic membrane protein 2 [Source:VGNC Symbol;Acc:VGNC:42676]
ENSCAFG00000004355	LIMS2	LIM zinc finger domain containing 2 [Source:VGNC Symbol;Acc:VGNC:42682]
ENSCAFG00000012488	LIN28A	lin-28 homolog A [Source:VGNC Symbol;Acc:VGNC:42683]
ENSCAFG00000005817	LIN7A	lin-7 homolog A, crumbs cell polarity complex component [Source:VGNC Symbol;Acc:VGNC:42686]
ENSCAFG00000001727	LINGO2	leucine rich repeat and Ig domain containing 2 [Source:VGNC Symbol;Acc:VGNC:42689]
ENSCAFG00000016560	LIPC	lipase C, hepatic type [Source:VGNC Symbol;Acc:VGNC:42694]
ENSCAFG00000004813	LIPE	lipase E, hormone sensitive type [Source:VGNC Symbol;Acc:VGNC:42695]
ENSCAFG00000016863	LMNA	lamin A/C [Source:VGNC Symbol;Acc:VGNC:42717]
ENSCAFG00000013317	LMX1A	LIM homeobox transcription factor 1 alpha [Source:VGNC Symbol;Acc:VGNC:42728]
ENSCAFG00000030076	LMX1B	LIM homeobox transcription factor 1 beta [Source:VGNC Symbol;Acc:VGNC:42729]
ENSCAFG00000017629	LOXHD1	lipoxygenase homology domains 1 [Source:VGNC Symbol;Acc:VGNC:42738]
ENSCAFG00000023910	LOXL1	lysyl oxidase like 1 [Source:HGNC Symbol;Acc:HGNC:6665]
ENSCAFG00000009187	LOXL2	lysyl oxidase like 2 [Source:VGNC Symbol;Acc:VGNC:42739]
ENSCAFG00000003621	LPIN1	lipin 1 [Source:VGNC Symbol;Acc:VGNC:42751]
ENSCAFG00000010161	LPL	lipoprotein lipase [Source:VGNC Symbol;Acc:VGNC:42754]
ENSCAFG00000000178	LRP1	LDL receptor related protein 1 [Source:VGNC Symbol;Acc:VGNC:42771]
ENSCAFG00000000677	LRP12	LDL receptor related protein 12 [Source:HGNC Symbol;Acc:HGNC:31708]
ENSCAFG00000012128	LRP2	LDL receptor related protein 2 [Source:VGNC Symbol;Acc:VGNC:42775]
ENSCAFG00000010871	LRP5	LDL receptor related protein 5 [Source:HGNC Symbol;Acc:HGNC:6697]
ENSCAFG00000014607	LRPAP1	LDL receptor related protein associated protein 1 [Source:VGNC Symbol;Acc:VGNC:42780]
ENSCAFG00000000434	LRRC10	leucine rich repeat containing 10 [Source:HGNC Symbol;Acc:HGNC:20264]
ENSCAFG00000005243	LRRC32	leucine rich repeat containing 32 [Source:HGNC Symbol;Acc:HGNC:4161]
ENSCAFG00000001108	LRRC6	leucine rich repeat containing 6 [Source:HGNC Symbol;Acc:HGNC:16725]
ENSCAFG00000005785	LRTOMT	leucine rich transmembrane and O-methyltransferase domain containing [Source:HGNC Symbol;Acc:HGNC:25033]
ENSCAFG00000011957	LSS	lanosterol synthase [Source:VGNC Symbol;Acc:VGNC:42851]
ENSCAFG00000000515	LTA	Canis lupus familiaris lymphotoxin alpha (LTA), mRNA. [Source:RefSeq mRNA;Acc:NM_001313849]
ENSCAFG00000012254	LTB4R	leukotriene B4 receptor [Source:VGNC Symbol;Acc:VGNC:42855]
ENSCAFG00000016948	LTBP2	latent transforming growth factor beta binding protein 2 [Source:VGNC Symbol;Acc:VGNC:42857]
ENSCAFG00000005133	LTBP4	latent transforming growth factor beta binding protein 4 [Source:VGNC Symbol;Acc:VGNC:42859]
ENSCAFG00000013763	LTF	Canis lupus familiaris lactotransferrin (LTF), mRNA. [Source:RefSeq mRNA;Acc:NM_001287076]
ENSCAFG00000006138	LUM	lumican [Source:VGNC Symbol;Acc:VGNC:42865]
ENSCAFG00000007960	MAB21L2	mab-21 like 2 [Source:VGNC Symbol;Acc:VGNC:42911]
ENSCAFG00000005893	MAFG	MAF bZIP transcription factor G [Source:VGNC Symbol;Acc:VGNC:42921]
ENSCAFG00000016491	MAFK	MAF bZIP transcription factor K [Source:VGNC Symbol;Acc:VGNC:42922]
ENSCAFG00000000105	MALT1	MALT1 paracaspase [Source:VGNC Symbol;Acc:VGNC:42936]
ENSCAFG00000014435	MAOA	monoamine oxidase A [Source:VGNC Symbol;Acc:VGNC:42953]
ENSCAFG00000017298	MAP2K1	mitogen-activated protein kinase kinase 1 [Source:VGNC Symbol;Acc:VGNC:42960]
ENSCAFG00000019138	MAP2K2	Dual specificity mitogen-activated protein kinase kinase 2 [Source:UniProtKB/Swiss-Prot;Acc:Q1HG70]
ENSCAFG00000006917	MAP3K1	mitogen-activated protein kinase kinase kinase 1 [Source:VGNC Symbol;Acc:VGNC:42966]
ENSCAFG00000006918	MAP3K12	mitogen-activated protein kinase kinase kinase 12 [Source:VGNC Symbol;Acc:VGNC:42968]
ENSCAFG00000000251	MAP3K5	mitogen-activated protein kinase kinase kinase 5 [Source:VGNC Symbol;Acc:VGNC:42975]
ENSCAFG00000002162	MAP4K4	mitogen-activated protein kinase kinase kinase kinase 4 [Source:VGNC Symbol;Acc:VGNC:42984]
ENSCAFG00000015421	MAPK1	mitogen-activated protein kinase 1 [Source:VGNC Symbol;Acc:VGNC:42991]
ENSCAFG00000001382	MAPK13	mitogen-activated protein kinase 13 [Source:VGNC Symbol;Acc:VGNC:42994]
ENSCAFG00000001378	MAPK14	mitogen-activated protein kinase 14 [Source:VGNC Symbol;Acc:VGNC:42995]
ENSCAFG00000018202	MAPK7	mitogen-activated protein kinase 7 [Source:VGNC Symbol;Acc:VGNC:43000]
ENSCAFG00000006551	MAPK8	mitogen-activated protein kinase 8 [Source:VGNC Symbol;Acc:VGNC:43001]
ENSCAFG00000009363	MAPK8IP1	mitogen-activated protein kinase 8 interacting protein 1 [Source:HGNC Symbol;Acc:HGNC:6882]
ENSCAFG00000013670	MAPT	microtubule associated protein tau [Source:VGNC Symbol;Acc:VGNC:43012]
ENSCAFG00000007797	MARVELD2	MARVEL domain containing 2 [Source:VGNC Symbol;Acc:VGNC:43029]
ENSCAFG00000003825	MATN3	matrilin 3 [Source:VGNC Symbol;Acc:VGNC:43041]
ENSCAFG00000001345	MATR3	N/A
ENSCAFG00000008603	MBNL1	muscleblind like splicing regulator 1 [Source:VGNC Symbol;Acc:VGNC:43057]
ENSCAFG00000000090	MC4R	melanocortin 4 receptor [Source:VGNC Symbol;Acc:VGNC:43067]
ENSCAFG00000012079	MCAM	melanoma cell adhesion molecule [Source:HGNC Symbol;Acc:HGNC:6934]
ENSCAFG00000011796	MCF2L2	MCF.2 cell line derived transforming sequence-like 2 [Source:HGNC Symbol;Acc:HGNC:30319]
ENSCAFG00000012050	MCL1	MCL1, BCL2 family apoptosis regulator [Source:VGNC Symbol;Acc:VGNC:43079]
ENSCAFG00000004052	MCM2	minichromosome maintenance complex component 2 [Source:VGNC Symbol;Acc:VGNC:43081]
ENSCAFG00000018234	MCOLN1	mucolipin 1 [Source:VGNC Symbol;Acc:VGNC:43090]
ENSCAFG00000020297	MCOLN3	mucolipin 3 [Source:HGNC Symbol;Acc:HGNC:13358]
ENSCAFG00000009669	MDM4	MDM4, p53 regulator [Source:VGNC Symbol;Acc:VGNC:43107]
ENSCAFG00000000168	ME2	malic enzyme 2 [Source:VGNC Symbol;Acc:VGNC:43110]
ENSCAFG00000019440	MECP2	methyl-CpG binding protein 2 [Source:VGNC Symbol;Acc:VGNC:43115]
ENSCAFG00000016441	MED1	mediator complex subunit 1 [Source:VGNC Symbol;Acc:VGNC:43117]
ENSCAFG00000016972	MED12	mediator complex subunit 12 [Source:VGNC Symbol;Acc:VGNC:43120]
ENSCAFG00000010775	MEF2A	myocyte enhancer factor 2A [Source:VGNC Symbol;Acc:VGNC:43143]
ENSCAFG00000008302	MEF2C	myocyte enhancer factor 2C [Source:VGNC Symbol;Acc:VGNC:43144]
ENSCAFG00000024473	MEFV	MEFV, pyrin innate immunity regulator [Source:VGNC Symbol;Acc:VGNC:43146]
ENSCAFG00000003233	MEIS1	Meis homeobox 1 [Source:VGNC Symbol;Acc:VGNC:43153]
ENSCAFG00000002420	MEOX2	mesenchyme homeobox 2 [Source:VGNC Symbol;Acc:VGNC:43158]
ENSCAFG00000001450	MEST	mesoderm specific transcript [Source:VGNC Symbol;Acc:VGNC:43165]
ENSCAFG00000003406	MET	MET proto-oncogene, receptor tyrosine kinase [Source:VGNC Symbol;Acc:VGNC:43166]
ENSCAFG00000016472	MFN2	mitofusin 2 [Source:VGNC Symbol;Acc:VGNC:43193]
ENSCAFG00000003860	MFSD8	major facilitator superfamily domain containing 8 [Source:VGNC Symbol;Acc:VGNC:43208]
ENSCAFG00000014489	MICU1	mitochondrial calcium uptake 1 [Source:VGNC Symbol;Acc:VGNC:43220]
ENSCAFG00000000561	MIOX	myo-inositol oxygenase [Source:VGNC Symbol;Acc:VGNC:43240]
ENSCAFG00000000128	MIP	major intrinsic protein of lens fiber [Source:VGNC Symbol;Acc:VGNC:43241]
ENSCAFG00000006496	MITF	melanogenesis associated transcription factor [Source:VGNC Symbol;Acc:VGNC:43248]
ENSCAFG00000001354	MLANA	melan-A [Source:VGNC Symbol;Acc:VGNC:43254]
ENSCAFG00000002316	MLIP	muscular LMNA interacting protein [Source:VGNC Symbol;Acc:VGNC:43259]
ENSCAFG00000012970	MLXIPL	MLX interacting protein like [Source:VGNC Symbol;Acc:VGNC:43269]
ENSCAFG00000010857	MMAB	methylmalonic aciduria (cobalamin deficiency) cblB type [Source:HGNC Symbol;Acc:HGNC:19331]
ENSCAFG00000015054	MMP1	matrix metallopeptidase 1 [Source:VGNC Symbol;Acc:VGNC:43273]
ENSCAFG00000023615	MMP12	matrix metallopeptidase 12 [Source:VGNC Symbol;Acc:VGNC:43275]
ENSCAFG00000015043	MMP13	matrix metallopeptidase 13 [Source:VGNC Symbol;Acc:VGNC:43276]
ENSCAFG00000011197	MMP14	matrix metallopeptidase 14 [Source:VGNC Symbol;Acc:VGNC:43277]
ENSCAFG00000009421	MMP2	matrix metallopeptidase 2 [Source:VGNC Symbol;Acc:VGNC:43280]
ENSCAFG00000015063	MMP3	Stromelysin-1 [Source:UniProtKB/Swiss-Prot;Acc:Q6Y4Q5]
ENSCAFG00000015080	MMP7	Matrix metallopeptidase 7 [Source:VGNC Symbol;Acc:VGNC:43288]
ENSCAFG00000023335	MMP8	matrix metallopeptidase 8 [Source:VGNC Symbol;Acc:VGNC:43289]
ENSCAFG00000009905	MMP9	matrix metallopeptidase 9 [Source:VGNC Symbol;Acc:VGNC:43290]
ENSCAFG00000011823	MN1	MN1 proto-oncogene, transcriptional regulator [Source:HGNC Symbol;Acc:HGNC:7180]
ENSCAFG00000017474	MPO	myeloperoxidase [Source:VGNC Symbol;Acc:VGNC:43341]
ENSCAFG00000012964	MPZ	myelin protein zero [Source:VGNC Symbol;Acc:VGNC:43353]
ENSCAFG00000006125	MRPL3	mitochondrial ribosomal protein L3 [Source:VGNC Symbol;Acc:VGNC:43390]
ENSCAFG00000005623	MRPS12	mitochondrial ribosomal protein S12 [Source:VGNC Symbol;Acc:VGNC:43410]
ENSCAFG00000004752	MRPS7	mitochondrial ribosomal protein S7 [Source:VGNC Symbol;Acc:VGNC:43426]
ENSCAFG00000010352	MS4A2	membrane spanning 4-domains A2 [Source:VGNC Symbol;Acc:VGNC:43432]
ENSCAFG00000002659	MSH2	mutS homolog 2 [Source:VGNC Symbol;Acc:VGNC:43438]
ENSCAFG00000002664	MSH6	mutS homolog 6 [Source:VGNC Symbol;Acc:VGNC:43441]
ENSCAFG00000011607	MSMO1	methylsterol monooxygenase 1 [Source:VGNC Symbol;Acc:VGNC:43445]
ENSCAFG00000016607	MSN	moesin [Source:VGNC Symbol;Acc:VGNC:43447]
ENSCAFG00000008143	MSRA	methionine sulfoxide reductase A [Source:VGNC Symbol;Acc:VGNC:43449]
ENSCAFG00000029740	MSRB3	methionine sulfoxide reductase B3 [Source:VGNC Symbol;Acc:VGNC:43451]
ENSCAFG00000009398	MSTN	myostatin [Source:VGNC Symbol;Acc:VGNC:43453]
ENSCAFG00000016731	MSX2	msh homeobox 2 [Source:VGNC Symbol;Acc:VGNC:43455]
ENSCAFG00000022729	MT-ATP6	ATP synthase subunit a [Source:UniProtKB/Swiss-Prot;Acc:Q9ZZ62]
ENSCAFG00000022723	MT-CO1	Cytochrome c oxidase subunit 1 [Source:UniProtKB/Swiss-Prot;Acc:Q9ZZ64]
ENSCAFG00000022726	MT-CO2	Cytochrome c oxidase subunit 2 [Source:UniProtKB/Swiss-Prot;Acc:P67780]
ENSCAFG00000022742	MT-CYB	Cytochrome b [Source:UniProtKB/Swiss-Prot;Acc:Q34101]
ENSCAFG00000003247	MTF1	metal regulatory transcription factor 1 [Source:VGNC Symbol;Acc:VGNC:43466]
ENSCAFG00000016558	MTHFR	methylenetetrahydrofolate reductase [Source:VGNC Symbol;Acc:VGNC:43473]
ENSCAFG00000019125	MTM1	myotubularin 1 [Source:VGNC Symbol;Acc:VGNC:43477]
ENSCAFG00000005459	MTMR14	myotubularin related protein 14 [Source:VGNC Symbol;Acc:VGNC:43482]
ENSCAFG00000004092	MTMR2	myotubularin related protein 2 [Source:VGNC Symbol;Acc:VGNC:43483]
ENSCAFG00000022713	MT-ND1	NADH-ubiquinone oxidoreductase chain 1 [Source:UniProtKB/Swiss-Prot;Acc:P92604]
ENSCAFG00000022717	MT-ND2	NADH-ubiquinone oxidoreductase chain 2 [Source:UniProtKB/Swiss-Prot;Acc:Q9ZZ65]
ENSCAFG00000022732	MT-ND3	NADH-ubiquinone oxidoreductase chain 3 [Source:UniProtKB/Swiss-Prot;Acc:Q9ZZ60]
ENSCAFG00000004246	MTNR1B	melatonin receptor 1B [Source:HGNC Symbol;Acc:HGNC:7464]
ENSCAFG00000002655	MTO1	mitochondrial tRNA translation optimization 1 [Source:VGNC Symbol;Acc:VGNC:43489]
ENSCAFG00000016648	MTOR	mechanistic target of rapamycin kinase [Source:VGNC Symbol;Acc:VGNC:43490]
ENSCAFG00000010118	MTRR	5-methyltetrahydrofolate-homocysteine methyltransferase reductase [Source:HGNC Symbol;Acc:HGNC:7473]
ENSCAFG00000017037	MUC1	N/A
ENSCAFG00000004612	MUTYH	mutY DNA glycosylase [Source:VGNC Symbol;Acc:VGNC:43505]
ENSCAFG00000007134	MYBPC1	myosin binding protein C, slow type [Source:VGNC Symbol;Acc:VGNC:43522]
ENSCAFG00000002982	MYBPC2	myosin binding protein C, fast type [Source:VGNC Symbol;Acc:VGNC:43523]
ENSCAFG00000008769	MYBPC3	myosin binding protein C, cardiac [Source:VGNC Symbol;Acc:VGNC:43524]
ENSCAFG00000010288	MYBPH	myosin binding protein H [Source:VGNC Symbol;Acc:VGNC:43525]
ENSCAFG00000001086	MYC	MYC proto-oncogene, bHLH transcription factor [Source:VGNC Symbol;Acc:VGNC:43527]
ENSCAFG00000004966	MYD88	myeloid differentiation primary response 88 [Source:VGNC Symbol;Acc:VGNC:43531]
ENSCAFG00000005808	MYF5	myogenic factor 5 [Source:VGNC Symbol;Acc:VGNC:43533]
ENSCAFG00000003156	MYH14	myosin heavy chain 14 [Source:VGNC Symbol;Acc:VGNC:43538]
ENSCAFG00000011619	MYH7	myosin-7 [Source:RefSeq peptide;Acc:NP_001107183]
ENSCAFG00000001630	MYH9	myosin heavy chain 9 [Source:VGNC Symbol;Acc:VGNC:43540]
ENSCAFG00000008524	MYL2	myosin light chain 2 [Source:VGNC Symbol;Acc:VGNC:43543]
ENSCAFG00000013618	MYL3	myosin light chain 3 [Source:VGNC Symbol;Acc:VGNC:43544]
ENSCAFG00000012119	MYLK	myosin light chain kinase [Source:VGNC Symbol;Acc:VGNC:43549]
ENSCAFG00000007089	MYLK2	myosin light chain kinase 2 [Source:VGNC Symbol;Acc:VGNC:43550]
ENSCAFG00000018319	MYO15A	myosin XVA [Source:VGNC Symbol;Acc:VGNC:43555]
ENSCAFG00000000156	MYO1A	myosin IA [Source:VGNC Symbol;Acc:VGNC:43560]
ENSCAFG00000004279	MYO3A	myosin IIIA [Source:VGNC Symbol;Acc:VGNC:43567]
ENSCAFG00000002741	MYO6	myosin VI [Source:VGNC Symbol;Acc:VGNC:43571]
ENSCAFG00000005074	MYO7A	myosin VIIA [Source:VGNC Symbol;Acc:VGNC:43572]
ENSCAFG00000004404	MYO7B	myosin VIIB [Source:VGNC Symbol;Acc:VGNC:43573]
ENSCAFG00000015532	MYO9B	myosin IXB [Source:VGNC Symbol;Acc:VGNC:43575]
ENSCAFG00000014924	MYOC	myocilin [Source:VGNC Symbol;Acc:VGNC:43576]
ENSCAFG00000007749	MYOF	myoferlin [Source:VGNC Symbol;Acc:VGNC:43579]
ENSCAFG00000018478	MYOM1	myomesin 1 [Source:VGNC Symbol;Acc:VGNC:43581]
ENSCAFG00000001140	MYOT	myotilin [Source:HGNC Symbol;Acc:HGNC:12399]
ENSCAFG00000014842	MYOZ1	myozenin 1 [Source:VGNC Symbol;Acc:VGNC:43583]
ENSCAFG00000012432	MYOZ2	myozenin 2 [Source:VGNC Symbol;Acc:VGNC:43584]
ENSCAFG00000018088	MYOZ3	myozenin 3 [Source:VGNC Symbol;Acc:VGNC:43585]
ENSCAFG00000013541	MYPN	myopalladin [Source:VGNC Symbol;Acc:VGNC:43586]
ENSCAFG00000005693	MZB1	marginal zone B and B1 cell specific protein [Source:VGNC Symbol;Acc:VGNC:43593]
ENSCAFG00000000172	N/A	N/A
ENSCAFG00000000341	N/A	N/A
ENSCAFG00000000485	N/A	N/A
ENSCAFG00000000492	N/A	N/A
ENSCAFG00000000548	N/A	N/A
ENSCAFG00000000564	N/A	N/A
ENSCAFG00000000579	N/A	N/A
ENSCAFG00000000580	N/A	N/A
ENSCAFG00000000626	N/A	N/A
ENSCAFG00000000701	N/A	N/A
ENSCAFG00000000867	N/A	N/A
ENSCAFG00000000900	N/A	N/A
ENSCAFG00000001285	N/A	N/A
ENSCAFG00000001309	N/A	N/A
ENSCAFG00000001588	N/A	N/A
ENSCAFG00000001675	N/A	N/A
ENSCAFG00000001689	N/A	N/A
ENSCAFG00000001854	N/A	N/A
ENSCAFG00000001924	N/A	N/A
ENSCAFG00000002336	N/A	N/A
ENSCAFG00000002440	N/A	N/A
ENSCAFG00000002448	N/A	N/A
ENSCAFG00000002508	N/A	N/A
ENSCAFG00000002615	N/A	N/A
ENSCAFG00000002712	N/A	N/A
ENSCAFG00000002713	N/A	N/A
ENSCAFG00000002716	N/A	N/A
ENSCAFG00000002763	N/A	N/A
ENSCAFG00000003318	N/A	N/A
ENSCAFG00000003343	N/A	N/A
ENSCAFG00000003862	N/A	N/A
ENSCAFG00000003863	N/A	N/A
ENSCAFG00000003894	N/A	N/A
ENSCAFG00000004288	N/A	N/A
ENSCAFG00000004446	N/A	N/A
ENSCAFG00000004632	N/A	N/A
ENSCAFG00000004882	N/A	N/A
ENSCAFG00000004905	N/A	N/A
ENSCAFG00000004924	N/A	N/A
ENSCAFG00000004962	N/A	N/A
ENSCAFG00000005001	N/A	N/A
ENSCAFG00000005196	N/A	N/A
ENSCAFG00000005282	N/A	N/A
ENSCAFG00000005434	N/A	N/A
ENSCAFG00000005529	N/A	N/A
ENSCAFG00000005542	N/A	N/A
ENSCAFG00000005575	N/A	N/A
ENSCAFG00000005582	N/A	N/A
ENSCAFG00000005588	N/A	N/A
ENSCAFG00000005629	N/A	N/A
ENSCAFG00000005757	N/A	N/A
ENSCAFG00000005773	N/A	N/A
ENSCAFG00000006007	N/A	N/A
ENSCAFG00000006540	N/A	N/A
ENSCAFG00000006545	N/A	N/A
ENSCAFG00000006594	N/A	N/A
ENSCAFG00000006913	N/A	N/A
ENSCAFG00000007407	N/A	N/A
ENSCAFG00000007435	N/A	N/A
ENSCAFG00000007610	N/A	N/A
ENSCAFG00000008121	N/A	N/A
ENSCAFG00000008126	N/A	N/A
ENSCAFG00000008291	N/A	N/A
ENSCAFG00000008309	N/A	N/A
ENSCAFG00000008367	N/A	N/A
ENSCAFG00000008380	N/A	N/A
ENSCAFG00000008433	N/A	N/A
ENSCAFG00000008683	N/A	N/A
ENSCAFG00000008732	N/A	N/A
ENSCAFG00000008917	N/A	N/A
ENSCAFG00000008998	N/A	N/A
ENSCAFG00000009128	N/A	N/A
ENSCAFG00000009164	N/A	N/A
ENSCAFG00000009311	N/A	N/A
ENSCAFG00000009554	N/A	N/A
ENSCAFG00000009682	N/A	N/A
ENSCAFG00000010036	N/A	N/A
ENSCAFG00000010200	N/A	N/A
ENSCAFG00000010202	N/A	N/A
ENSCAFG00000010220	N/A	N/A
ENSCAFG00000010290	N/A	N/A
ENSCAFG00000010410	N/A	N/A
ENSCAFG00000010466	N/A	N/A
ENSCAFG00000010586	N/A	N/A
ENSCAFG00000010648	N/A	N/A
ENSCAFG00000010688	N/A	N/A
ENSCAFG00000010849	N/A	N/A
ENSCAFG00000010992	N/A	N/A
ENSCAFG00000011047	N/A	N/A
ENSCAFG00000011168	N/A	N/A
ENSCAFG00000011182	N/A	N/A
ENSCAFG00000011192	N/A	N/A
ENSCAFG00000011195	N/A	N/A
ENSCAFG00000011362	N/A	N/A
ENSCAFG00000011452	N/A	N/A
ENSCAFG00000011465	N/A	N/A
ENSCAFG00000011915	N/A	N/A
ENSCAFG00000011976	N/A	N/A
ENSCAFG00000012059	N/A	N/A
ENSCAFG00000012147	N/A	N/A
ENSCAFG00000012196	N/A	N/A
ENSCAFG00000012703	N/A	N/A
ENSCAFG00000012763	N/A	N/A
ENSCAFG00000012787	N/A	N/A
ENSCAFG00000012841	N/A	N/A
ENSCAFG00000012998	N/A	N/A
ENSCAFG00000013035	N/A	N/A
ENSCAFG00000013040	N/A	N/A
ENSCAFG00000013277	N/A	N/A
ENSCAFG00000013610	N/A	N/A
ENSCAFG00000013713	N/A	N/A
ENSCAFG00000013809	N/A	N/A
ENSCAFG00000013899	N/A	N/A
ENSCAFG00000013949	N/A	N/A
ENSCAFG00000013984	N/A	N/A
ENSCAFG00000014144	N/A	N/A
ENSCAFG00000014229	N/A	N/A
ENSCAFG00000014256	N/A	N/A
ENSCAFG00000014481	N/A	Anionic trypsin [Source:UniProtKB/Swiss-Prot;Acc:P06872]
ENSCAFG00000014532	N/A	N/A
ENSCAFG00000014733	N/A	N/A
ENSCAFG00000014783	N/A	N/A
ENSCAFG00000014939	N/A	N/A
ENSCAFG00000014973	N/A	N/A
ENSCAFG00000014990	N/A	N/A
ENSCAFG00000015062	N/A	N/A
ENSCAFG00000015164	N/A	N/A
ENSCAFG00000015193	N/A	N/A
ENSCAFG00000015320	N/A	N/A
ENSCAFG00000015754	N/A	N/A
ENSCAFG00000015771	N/A	N/A
ENSCAFG00000015892	N/A	N/A
ENSCAFG00000016098	N/A	N/A
ENSCAFG00000016282	N/A	N/A
ENSCAFG00000016314	N/A	N/A
ENSCAFG00000016367	N/A	N/A
ENSCAFG00000016966	N/A	N/A
ENSCAFG00000017108	N/A	N/A
ENSCAFG00000017264	N/A	N/A
ENSCAFG00000017563	N/A	N/A
ENSCAFG00000018129	N/A	N/A
ENSCAFG00000018149	N/A	N/A
ENSCAFG00000018353	N/A	N/A
ENSCAFG00000018391	N/A	N/A
ENSCAFG00000018448	N/A	N/A
ENSCAFG00000018512	N/A	N/A
ENSCAFG00000018757	N/A	N/A
ENSCAFG00000018825	N/A	N/A
ENSCAFG00000018873	N/A	N/A
ENSCAFG00000018974	N/A	N/A
ENSCAFG00000019243	N/A	N/A
ENSCAFG00000019256	N/A	N/A
ENSCAFG00000019307	N/A	N/A
ENSCAFG00000019365	N/A	N/A
ENSCAFG00000019431	N/A	N/A
ENSCAFG00000019461	N/A	N/A
ENSCAFG00000019479	N/A	N/A
ENSCAFG00000019620	N/A	N/A
ENSCAFG00000019771	N/A	N/A
ENSCAFG00000019784	N/A	N/A
ENSCAFG00000020072	N/A	N/A
ENSCAFG00000020075	N/A	N/A
ENSCAFG00000020220	N/A	N/A
ENSCAFG00000020462	N/A	N/A
ENSCAFG00000023151	N/A	N/A
ENSCAFG00000023173	N/A	N/A
ENSCAFG00000023202	N/A	N/A
ENSCAFG00000023349	N/A	N/A
ENSCAFG00000023408	N/A	N/A
ENSCAFG00000023416	N/A	N/A
ENSCAFG00000023441	N/A	N/A
ENSCAFG00000023764	N/A	N/A
ENSCAFG00000023930	N/A	N/A
ENSCAFG00000023972	N/A	N/A
ENSCAFG00000024028	N/A	N/A
ENSCAFG00000024143	N/A	N/A
ENSCAFG00000024229	N/A	N/A
ENSCAFG00000024274	N/A	N/A
ENSCAFG00000024344	N/A	N/A
ENSCAFG00000024629	N/A	N/A
ENSCAFG00000024861	N/A	N/A
ENSCAFG00000024864	N/A	N/A
ENSCAFG00000024903	N/A	N/A
ENSCAFG00000024905	N/A	N/A
ENSCAFG00000025016	N/A	N/A
ENSCAFG00000025116	N/A	N/A
ENSCAFG00000025410	N/A	N/A
ENSCAFG00000028479	N/A	N/A
ENSCAFG00000028506	N/A	N/A
ENSCAFG00000028589	N/A	N/A
ENSCAFG00000028653	N/A	N/A
ENSCAFG00000028765	N/A	N/A
ENSCAFG00000028835	N/A	N/A
ENSCAFG00000028844	N/A	N/A
ENSCAFG00000028888	N/A	N/A
ENSCAFG00000028981	N/A	N/A
ENSCAFG00000029004	N/A	N/A
ENSCAFG00000029022	N/A	N/A
ENSCAFG00000029046	N/A	N/A
ENSCAFG00000029151	N/A	N/A
ENSCAFG00000029346	N/A	N/A
ENSCAFG00000029376	N/A	N/A
ENSCAFG00000029381	N/A	N/A
ENSCAFG00000029403	N/A	N/A
ENSCAFG00000029455	N/A	N/A
ENSCAFG00000029470	N/A	N/A
ENSCAFG00000029830	N/A	N/A
ENSCAFG00000029897	N/A	N/A
ENSCAFG00000029904	N/A	N/A
ENSCAFG00000029928	N/A	N/A
ENSCAFG00000029992	N/A	N/A
ENSCAFG00000030007	N/A	N/A
ENSCAFG00000030043	N/A	N/A
ENSCAFG00000030088	N/A	N/A
ENSCAFG00000030097	N/A	N/A
ENSCAFG00000030115	N/A	N/A
ENSCAFG00000030164	N/A	N/A
ENSCAFG00000030459	N/A	N/A
ENSCAFG00000030588	N/A	N/A
ENSCAFG00000030630	N/A	N/A
ENSCAFG00000031052	N/A	N/A
ENSCAFG00000031146	N/A	N/A
ENSCAFG00000031155	N/A	N/A
ENSCAFG00000031239	N/A	N/A
ENSCAFG00000031254	N/A	N/A
ENSCAFG00000031463	N/A	N/A
ENSCAFG00000031933	N/A	N/A
ENSCAFG00000032012	N/A	N/A
ENSCAFG00000032243	N/A	type II iodothyronine deiodinase [Source:RefSeq peptide;Acc:NP_001116117]
ENSCAFG00000032286	N/A	N/A
ENSCAFG00000032304	N/A	N/A
ENSCAFG00000032335	N/A	N/A
ENSCAFG00000032358	N/A	N/A
ENSCAFG00000032615	N/A	N/A
ENSCAFG00000032639	N/A	N/A
ENSCAFG00000032684	N/A	N/A
ENSCAFG00000032752	N/A	N/A
ENSCAFG00000002763	N/A	Protein FRG2-like-1 [Source:NCBI gene;Acc:100855990]
ENSCAFG00000019415	NAA10	N(alpha)-acetyltransferase 10, NatA catalytic subunit [Source:HGNC Symbol;Acc:HGNC:18704]
ENSCAFG00000008792	NAA25	N(alpha)-acetyltransferase 25, NatB auxiliary subunit [Source:HGNC Symbol;Acc:HGNC:25783]
ENSCAFG00000003992	NAMPT	nicotinamide phosphoribosyltransferase [Source:HGNC Symbol;Acc:HGNC:30092]
ENSCAFG00000004112	NAPA	NSF attachment protein alpha [Source:VGNC Symbol;Acc:VGNC:43619]
ENSCAFG00000003342	NAPSA	napsin A aspartic peptidase [Source:VGNC Symbol;Acc:VGNC:43624]
ENSCAFG00000002099	NCK2	NCK adaptor protein 2 [Source:VGNC Symbol;Acc:VGNC:43652]
ENSCAFG00000005003	NCKAP5	NCK associated protein 5 [Source:VGNC Symbol;Acc:VGNC:43654]
ENSCAFG00000007588	NCOA6	nuclear receptor coactivator 6 [Source:VGNC Symbol;Acc:VGNC:43663]
ENSCAFG00000018040	NCOR1	nuclear receptor corepressor 1 [Source:VGNC Symbol;Acc:VGNC:43665]
ENSCAFG00000022735	ND4	NADH-ubiquinone oxidoreductase chain 4 [Source:UniProtKB/Swiss-Prot;Acc:Q9ZZ58]
ENSCAFG00000022734	ND4L	NADH-ubiquinone oxidoreductase chain 4L [Source:UniProtKB/Swiss-Prot;Acc:Q9ZZ59]
ENSCAFG00000022739	ND5	NADH dehydrogenase subunit 5 (mitochondrion) [Source:RefSeq peptide;Acc:NP_008481]
ENSCAFG00000022740	ND6	NADH-ubiquinone oxidoreductase chain 6 [Source:UniProtKB/Swiss-Prot;Acc:Q9ZZ56]
ENSCAFG00000014457	NDP	NDP, norrin cystine knot growth factor [Source:VGNC Symbol;Acc:VGNC:43678]
ENSCAFG00000001141	NDRG1	protein NDRG1 [Source:RefSeq peptide;Acc:NP_001271363]
ENSCAFG00000005461	NDRG2	NDRG family member 2 [Source:VGNC Symbol;Acc:VGNC:43679]
ENSCAFG00000012591	NDUFA10	NADH:ubiquinone oxidoreductase subunit A10 [Source:HGNC Symbol;Acc:HGNC:7684]
ENSCAFG00000006232	NDUFA12	NADH:ubiquinone oxidoreductase subunit A12 [Source:VGNC Symbol;Acc:VGNC:43685]
ENSCAFG00000005861	NDUFA2	NADH:ubiquinone oxidoreductase subunit A2 [Source:VGNC Symbol;Acc:VGNC:43687]
ENSCAFG00000007163	NDUFAF2	NADH:ubiquinone oxidoreductase complex assembly factor 2 [Source:VGNC Symbol;Acc:VGNC:43692]
ENSCAFG00000009419	NDUFAF6	NADH:ubiquinone oxidoreductase complex assembly factor 6 [Source:VGNC Symbol;Acc:VGNC:43696]
ENSCAFG00000014834	NDUFB11	NADH:ubiquinone oxidoreductase subunit B11 [Source:VGNC Symbol;Acc:VGNC:43700]
ENSCAFG00000001045	NDUFB9	NADH:ubiquinone oxidoreductase subunit B9 [Source:VGNC Symbol;Acc:VGNC:43706]
ENSCAFG00000008411	NDUFS3	NADH:ubiquinone oxidoreductase core subunit S3 [Source:VGNC Symbol;Acc:VGNC:43708]
ENSCAFG00000019529	NDUFS7	NADH:ubiquinone oxidoreductase core subunit S7 [Source:VGNC Symbol;Acc:VGNC:43710]
ENSCAFG00000011083	NDUFS8	N/A
ENSCAFG00000011109	NDUFV1	NADH:ubiquinone oxidoreductase core subunit V1 [Source:VGNC Symbol;Acc:VGNC:43711]
ENSCAFG00000018686	NDUFV2	NADH:ubiquinone oxidoreductase core subunit V2 [Source:HGNC Symbol;Acc:HGNC:7717]
ENSCAFG00000004130	NEBL	nebulette [Source:VGNC Symbol;Acc:VGNC:43713]
ENSCAFG00000012012	NECTIN1	Canis lupus familiaris nectin cell adhesion molecule 1 (NECTIN1), mRNA. [Source:RefSeq mRNA;Acc:NM_001287128]
ENSCAFG00000009014	NEFL	neurofilament light [Source:VGNC Symbol;Acc:VGNC:43724]
ENSCAFG00000017779	NEO1	neogenin 1 [Source:VGNC Symbol;Acc:VGNC:43745]
ENSCAFG00000020353	NEXN	nexilin F-actin binding protein [Source:VGNC Symbol;Acc:VGNC:43760]
ENSCAFG00000012307	NF2	neurofibromin 2 [Source:VGNC Symbol;Acc:VGNC:43762]
ENSCAFG00000013506	NFE2L2	nuclear factor, erythroid 2 like 2 [Source:VGNC Symbol;Acc:VGNC:43773]
ENSCAFG00000010730	NFKB1	nuclear factor kappa B subunit 1 [Source:VGNC Symbol;Acc:VGNC:43780]
ENSCAFG00000009739	NGF	beta-nerve growth factor precursor [Source:RefSeq peptide;Acc:NP_001181879]
ENSCAFG00000016934	NGFR	nerve growth factor receptor [Source:HGNC Symbol;Acc:HGNC:7809]
ENSCAFG00000000240	NHP2	NHP2 ribonucleoprotein [Source:VGNC Symbol;Acc:VGNC:43803]
ENSCAFG00000012783	NHS	NHS actin remodeling regulator [Source:VGNC Symbol;Acc:VGNC:43804]
ENSCAFG00000031960	NKX2-5	NK2 homeobox 5 [Source:VGNC Symbol;Acc:VGNC:43834]
ENSCAFG00000028557	NKX2-8	NK2 homeobox 8 [Source:VGNC Symbol;Acc:VGNC:43835]
ENSCAFG00000015493	NLRP1	NLR family pyrin domain containing 1 [Source:VGNC Symbol;Acc:VGNC:43845]
ENSCAFG00000010686	NLRP3	NLR family pyrin domain containing 3 [Source:VGNC Symbol;Acc:VGNC:43848]
ENSCAFG00000003652	NME8	NME/NM23 family member 8 [Source:VGNC Symbol;Acc:VGNC:43859]
ENSCAFG00000032251	NMNAT1	nicotinamide nucleotide adenylyltransferase 1 [Source:VGNC Symbol;Acc:VGNC:43862]
ENSCAFG00000003074	NOD1	nucleotide binding oligomerization domain containing 1 [Source:VGNC Symbol;Acc:VGNC:43877]
ENSCAFG00000009818	NOD2	nucleotide binding oligomerization domain containing 2 [Source:VGNC Symbol;Acc:VGNC:43878]
ENSCAFG00000029101	NOG	noggin [Source:HGNC Symbol;Acc:HGNC:7866]
ENSCAFG00000031420	NOP10	NOP10 ribonucleoprotein [Source:VGNC Symbol;Acc:VGNC:43886]
ENSCAFG00000009820	NOS1	nitric oxide synthase 1 [Source:VGNC Symbol;Acc:VGNC:43894]
ENSCAFG00000013086	NOS1AP	nitric oxide synthase 1 adaptor protein [Source:HGNC Symbol;Acc:HGNC:16859]
ENSCAFG00000018642	NOS2	Canis lupus familiaris nitric oxide synthase 2 (NOS2), mRNA. [Source:RefSeq mRNA;Acc:NM_001313848]
ENSCAFG00000004687	NOS3	nitric oxide synthase 3 [Source:VGNC Symbol;Acc:VGNC:43896]
ENSCAFG00000019633	NOTCH1	notch 1 [Source:VGNC Symbol;Acc:VGNC:43898]
ENSCAFG00000030440	NOV	nephroblastoma overexpressed [Source:HGNC Symbol;Acc:HGNC:7885]
ENSCAFG00000017568	NOX1	NADPH oxidase 1 [Source:VGNC Symbol;Acc:VGNC:43903]
ENSCAFG00000004369	NOX4	NADPH oxidase 4 [Source:VGNC Symbol;Acc:VGNC:43905]
ENSCAFG00000018183	NPC1	NPC intracellular cholesterol transporter 1 [Source:VGNC Symbol;Acc:VGNC:43913]
ENSCAFG00000016539	NPPA	natriuretic peptide A [Source:VGNC Symbol;Acc:VGNC:43925]
ENSCAFG00000016538	NPPB	natriuretic peptide B [Source:VGNC Symbol;Acc:VGNC:43926]
ENSCAFG00000011135	NPPC	natriuretic peptide C [Source:VGNC Symbol;Acc:VGNC:43927]
ENSCAFG00000017511	NPR1	natriuretic peptide receptor 1 [Source:VGNC Symbol;Acc:VGNC:43928]
ENSCAFG00000002233	NPR2	natriuretic peptide receptor 2 [Source:VGNC Symbol;Acc:VGNC:43929]
ENSCAFG00000003170	NPSR1	neuropeptide S receptor 1 [Source:HGNC Symbol;Acc:HGNC:23631]
ENSCAFG00000002801	NPY	neuropeptide Y [Source:VGNC Symbol;Acc:VGNC:43936]
ENSCAFG00000020252	NQO1	NAD(P)H quinone dehydrogenase 1 [Source:HGNC Symbol;Acc:HGNC:2874]
ENSCAFG00000008824	NR1H3	nuclear receptor subfamily 1 group H member 3 [Source:VGNC Symbol;Acc:VGNC:43943]
ENSCAFG00000006835	NR1H4	nuclear receptor subfamily 1 group H member 4 [Source:VGNC Symbol;Acc:VGNC:43944]
ENSCAFG00000011094	NR1I2	nuclear receptor subfamily 1 group I member 2 [Source:HGNC Symbol;Acc:HGNC:7968]
ENSCAFG00000012921	NR1I3	nuclear receptor subfamily 1 group I member 3 [Source:VGNC Symbol;Acc:VGNC:43945]
ENSCAFG00000006293	NR3C1	nuclear receptor subfamily 3 group C member 1 [Source:VGNC Symbol;Acc:VGNC:43952]
ENSCAFG00000007813	NR3C2	nuclear receptor subfamily 3 group C member 2 [Source:VGNC Symbol;Acc:VGNC:43953]
ENSCAFG00000007338	NR4A1	nuclear receptor subfamily 4 group A member 1 [Source:VGNC Symbol;Acc:VGNC:43954]
ENSCAFG00000009209	NR4A2	nuclear receptor subfamily 4 group A member 2 [Source:VGNC Symbol;Acc:VGNC:43955]
ENSCAFG00000009532	NRAS	NRAS proto-oncogene, GTPase [Source:VGNC Symbol;Acc:VGNC:43959]
ENSCAFG00000006371	NRG1	neuregulin 1 [Source:VGNC Symbol;Acc:VGNC:43967]
ENSCAFG00000005731	NRG2	neuregulin 2 [Source:VGNC Symbol;Acc:VGNC:43968]
ENSCAFG00000016473	NSD1	nuclear receptor binding SET domain protein 1 [Source:VGNC Symbol;Acc:VGNC:43980]
ENSCAFG00000019172	NSDHL	NAD(P) dependent steroid dehydrogenase-like [Source:HGNC Symbol;Acc:HGNC:13398]
ENSCAFG00000002994	NT5E	5'-nucleotidase ecto [Source:VGNC Symbol;Acc:VGNC:44000]
ENSCAFG00000003838	NTF4	neurotrophin 4 [Source:VGNC Symbol;Acc:VGNC:44003]
ENSCAFG00000009907	NTM	neurotrimin [Source:VGNC Symbol;Acc:VGNC:44005]
ENSCAFG00000006388	NTN4	netrin 4 [Source:VGNC Symbol;Acc:VGNC:44009]
ENSCAFG00000016528	NTRK1	neurotrophic receptor tyrosine kinase 1 [Source:VGNC Symbol;Acc:VGNC:44011]
ENSCAFG00000001380	NTRK2	neurotrophic receptor tyrosine kinase 2 [Source:VGNC Symbol;Acc:VGNC:44012]
ENSCAFG00000008713	NUCB2	nucleobindin 2 [Source:VGNC Symbol;Acc:VGNC:44020]
ENSCAFG00000016431	NUDT1	nudix hydrolase 1 [Source:VGNC Symbol;Acc:VGNC:44024]
ENSCAFG00000008299	NUP160	nucleoporin 160 [Source:VGNC Symbol;Acc:VGNC:44047]
ENSCAFG00000015327	NXNL1	nucleoredoxin like 1 [Source:VGNC Symbol;Acc:VGNC:44074]
ENSCAFG00000023556	OAS1	2'-5'-oligoadenylate synthetase 1 [Source:VGNC Symbol;Acc:VGNC:44086]
ENSCAFG00000001161	OBSCN	obscurin, cytoskeletal calmodulin and titin-interacting RhoGEF [Source:HGNC Symbol;Acc:HGNC:15719]
ENSCAFG00000015641	OBSL1	obscurin like 1 [Source:HGNC Symbol;Acc:HGNC:29092]
ENSCAFG00000007805	OCLN	occludin [Source:VGNC Symbol;Acc:VGNC:44094]
ENSCAFG00000018690	OCRL	OCRL, inositol polyphosphate-5-phosphatase [Source:VGNC Symbol;Acc:VGNC:44095]
ENSCAFG00000005344	OGG1	8-oxoguanine DNA glycosylase [Source:VGNC Symbol;Acc:VGNC:44109]
ENSCAFG00000002313	OGN	osteoglycin [Source:VGNC Symbol;Acc:VGNC:44110]
ENSCAFG00000013495	OLR1	oxidized low density lipoprotein receptor 1 [Source:VGNC Symbol;Acc:VGNC:44120]
ENSCAFG00000004419	OPA3	OPA3, outer mitochondrial membrane lipid metabolism regulator [Source:VGNC Symbol;Acc:VGNC:44126]
ENSCAFG00000015975	OPN4	opsin 4 [Source:HGNC Symbol;Acc:HGNC:14449]
ENSCAFG00000009468	OPTC	opticin [Source:VGNC Symbol;Acc:VGNC:44135]
ENSCAFG00000004769	OPTN	optineurin [Source:VGNC Symbol;Acc:VGNC:44136]
ENSCAFG00000008233	ORAI1	ORAI calcium release-activated calcium modulator 1 [Source:VGNC Symbol;Acc:VGNC:44137]
ENSCAFG00000012602	OSBPL2	oxysterol binding protein like 2 [Source:VGNC Symbol;Acc:VGNC:44154]
ENSCAFG00000012468	OSM	oncostatin M [Source:VGNC Symbol;Acc:VGNC:44166]
ENSCAFG00000003757	OSTM1	osteopetrosis associated transmembrane protein 1 [Source:VGNC Symbol;Acc:VGNC:44172]
ENSCAFG00000014023	OTC	ornithine carbamoyltransferase [Source:VGNC Symbol;Acc:VGNC:44174]
ENSCAFG00000017706	OTOA	otoancorin [Source:VGNC Symbol;Acc:VGNC:44175]
ENSCAFG00000004385	OTOF	otoferlin [Source:VGNC Symbol;Acc:VGNC:44176]
ENSCAFG00000009037	OTOG	otogelin [Source:VGNC Symbol;Acc:VGNC:44177]
ENSCAFG00000015666	OTOP1	otopetrin 1 [Source:VGNC Symbol;Acc:VGNC:44179]
ENSCAFG00000030197	OTOR	otoraplin [Source:HGNC Symbol;Acc:HGNC:8517]
ENSCAFG00000031916	OTOS	otospiralin [Source:VGNC Symbol;Acc:VGNC:44181]
ENSCAFG00000015216	OTX2	orthodenticle homeobox 2 [Source:VGNC Symbol;Acc:VGNC:44194]
ENSCAFG00000005453	OVOL2	ovo like zinc finger 2 [Source:VGNC Symbol;Acc:VGNC:44197]
ENSCAFG00000005553	OXTR	oxytocin receptor [Source:VGNC Symbol;Acc:VGNC:44206]
ENSCAFG00000006270	P2RX2	purinergic receptor P2X 2 [Source:VGNC Symbol;Acc:VGNC:44208]
ENSCAFG00000008401	P2RX7	purinergic receptor P2X 7 [Source:VGNC Symbol;Acc:VGNC:44212]
ENSCAFG00000008534	P2RY12	purinergic receptor P2Y12 [Source:VGNC Symbol;Acc:VGNC:44214]
ENSCAFG00000013985	P3H2	prolyl 3-hydroxylase 2 [Source:VGNC Symbol;Acc:VGNC:44220]
ENSCAFG00000011482	PABPN1	poly(A) binding protein nuclear 1 [Source:HGNC Symbol;Acc:HGNC:8565]
ENSCAFG00000018417	PACS2	phosphofurin acidic cluster sorting protein 2 [Source:VGNC Symbol;Acc:VGNC:44230]
ENSCAFG00000015813	PADI2	peptidyl arginine deiminase 2 [Source:VGNC Symbol;Acc:VGNC:44235]
ENSCAFG00000009688	PAK1IP1	PAK1 interacting protein 1 [Source:VGNC Symbol;Acc:VGNC:44244]
ENSCAFG00000006865	PAMR1	peptidase domain containing associated with muscle regeneration 1 [Source:VGNC Symbol;Acc:VGNC:44251]
ENSCAFG00000003488	PAPPA	pappalysin 1 [Source:VGNC Symbol;Acc:VGNC:44256]
ENSCAFG00000014225	PAPPA2	pappalysin 2 [Source:VGNC Symbol;Acc:VGNC:44257]
ENSCAFG00000019674	PARK7	Parkinsonism associated deglycase [Source:VGNC Symbol;Acc:VGNC:44266]
ENSCAFG00000018795	PARN	poly(A)-specific ribonuclease [Source:HGNC Symbol;Acc:HGNC:8609]
ENSCAFG00000016089	PARP1	poly(ADP-ribose) polymerase 1 [Source:HGNC Symbol;Acc:HGNC:270]
ENSCAFG00000009709	PAX2	paired box 2 [Source:VGNC Symbol;Acc:VGNC:44276]
ENSCAFG00000016041	PAX3	paired box 3 [Source:VGNC Symbol;Acc:VGNC:44277]
ENSCAFG00000001719	PAX4	paired box 4 [Source:HGNC Symbol;Acc:HGNC:8618]
ENSCAFG00000002357	PAX5	paired box 5 [Source:VGNC Symbol;Acc:VGNC:44278]
ENSCAFG00000007309	PAX8	paired box 8 [Source:VGNC Symbol;Acc:VGNC:44279]
ENSCAFG00000013289	PBX1	PBX homeobox 1 [Source:VGNC Symbol;Acc:VGNC:44286]
ENSCAFG00000012081	PC	pyruvate carboxylase [Source:HGNC Symbol;Acc:HGNC:8636]
ENSCAFG00000023626	PCARE	Canis lupus familiaris photoreceptor cilium actin regulator (PCARE), mRNA. [Source:RefSeq mRNA;Acc:NM_001284459].
ENSCAFG00000014104	PCBD1	pterin-4 alpha-carbinolamine dehydratase 1 [Source:VGNC Symbol;Acc:VGNC:44291]
ENSCAFG00000006229	PCDH1	protocadherin 1 [Source:VGNC Symbol;Acc:VGNC:44294]
ENSCAFG00000015538	PCDH15	protocadherin related 15 [Source:HGNC Symbol;Acc:HGNC:14674]
ENSCAFG00000012065	PCK1	phosphoenolpyruvate carboxykinase 1 [Source:VGNC Symbol;Acc:VGNC:44307]
ENSCAFG00000011868	PCK2	phosphoenolpyruvate carboxykinase 2, mitochondrial [Source:VGNC Symbol;Acc:VGNC:44308]
ENSCAFG00000006743	PCMTD1	protein-L-isoaspartate (D-aspartate) O-methyltransferase domain containing 1 [Source:HGNC Symbol;Acc:HGNC:30483]
ENSCAFG00000006030	PCNA	proliferating cell nuclear antigen [Source:VGNC Symbol;Acc:VGNC:44310]
ENSCAFG00000013184	PDCD1	programmed cell death 1 [Source:VGNC Symbol;Acc:VGNC:44334]
ENSCAFG00000000795	PDE10A	phosphodiesterase 10A [Source:VGNC Symbol;Acc:VGNC:44345]
ENSCAFG00000005698	PDE2A	phosphodiesterase 2A [Source:VGNC Symbol;Acc:VGNC:44351]
ENSCAFG00000012391	PDE3A	phosphodiesterase 3A [Source:VGNC Symbol;Acc:VGNC:44352]
ENSCAFG00000008487	PDE3B	phosphodiesterase 3B [Source:HGNC Symbol;Acc:HGNC:8779]
ENSCAFG00000007100	PDE4D	phosphodiesterase 4D [Source:VGNC Symbol;Acc:VGNC:44355]
ENSCAFG00000012472	PDE5A	phosphodiesterase 5A [Source:VGNC Symbol;Acc:VGNC:44356]
ENSCAFG00000009253	PDE8B	phosphodiesterase 8B [Source:VGNC Symbol;Acc:VGNC:44366]
ENSCAFG00000011193	PDGFA	platelet derived growth factor subunit A [Source:VGNC Symbol;Acc:VGNC:44368]
ENSCAFG00000001356	PDGFB	platelet derived growth factor subunit B [Source:VGNC Symbol;Acc:VGNC:44369]
ENSCAFG00000002057	PDGFRA	platelet derived growth factor receptor alpha [Source:VGNC Symbol;Acc:VGNC:44372]
ENSCAFG00000013030	PDHA1	pyruvate dehydrogenase E1 alpha 1 subunit [Source:HGNC Symbol;Acc:HGNC:8806]
ENSCAFG00000002129	PDK4	Pyruvate dehydrogenase kinase 4 [Source:VGNC Symbol;Acc:VGNC:44383]
ENSCAFG00000029034	PDLIM3	PDZ and LIM domain 3 [Source:VGNC Symbol;Acc:VGNC:44385]
ENSCAFG00000010071	PDLIM5	PDZ and LIM domain 5 [Source:VGNC Symbol;Acc:VGNC:44387]
ENSCAFG00000016363	PDPN	N/A
ENSCAFG00000004332	PDSS1	decaprenyl diphosphate synthase subunit 1 [Source:VGNC Symbol;Acc:VGNC:44394]
ENSCAFG00000030036	PDSS2	decaprenyl diphosphate synthase subunit 2 [Source:VGNC Symbol;Acc:VGNC:44395]
ENSCAFG00000006746	PDX1	pancreatic and duodenal homeobox 1 [Source:VGNC Symbol;Acc:VGNC:44396]
ENSCAFG00000009763	PDZD7	PDZ domain containing 7 [Source:HGNC Symbol;Acc:HGNC:26257]
ENSCAFG00000012475	PEA15	proliferation and apoptosis adaptor protein 15 [Source:VGNC Symbol;Acc:VGNC:44406]
ENSCAFG00000009910	PEBP1	phosphatidylethanolamine binding protein 1 [Source:HGNC Symbol;Acc:HGNC:8630]
ENSCAFG00000011740	PECAM1	platelet and endothelial cell adhesion molecule 1 [Source:VGNC Symbol;Acc:VGNC:44410]
ENSCAFG00000003162	PELI1	pellino E3 ubiquitin protein ligase 1 [Source:VGNC Symbol;Acc:VGNC:44414]
ENSCAFG00000007063	PENK	proenkephalin [Source:HGNC Symbol;Acc:HGNC:8831]
ENSCAFG00000001977	PEX1	peroxisomal biogenesis factor 1 [Source:HGNC Symbol;Acc:HGNC:8850]
ENSCAFG00000014064	PEX5	peroxisomal biogenesis factor 5 [Source:VGNC Symbol;Acc:VGNC:44435]
ENSCAFG00000001748	PEX6	peroxisomal biogenesis factor 6 [Source:VGNC Symbol;Acc:VGNC:44437]
ENSCAFG00000000253	PEX7	peroxisomal biogenesis factor 7 [Source:VGNC Symbol;Acc:VGNC:44438]
ENSCAFG00000005742	PFDN1	N/A
ENSCAFG00000016308	PGA	N/A
ENSCAFG00000019741	PGB	N/A
ENSCAFG00000001602	PGC	progastricsin [Source:HGNC Symbol;Acc:HGNC:8890]
ENSCAFG00000016995	PGF	placental growth factor [Source:VGNC Symbol;Acc:VGNC:44457]
ENSCAFG00000018670	PGM1	phosphoglucomutase 1 [Source:VGNC Symbol;Acc:VGNC:44463]
ENSCAFG00000003978	PGR	progesterone receptor [Source:VGNC Symbol;Acc:VGNC:44469]
ENSCAFG00000013824	PHC1	polyhomeotic homolog 1 [Source:VGNC Symbol;Acc:VGNC:44477]
ENSCAFG00000009197	PHTF1	putative homeodomain transcription factor 1 [Source:HGNC Symbol;Acc:HGNC:8939]
ENSCAFG00000009641	PI3	peptidase inhibitor 3 [Source:VGNC Symbol;Acc:VGNC:44516]
ENSCAFG00000017968	PIH1D3	PIH1 domain containing 3 [Source:VGNC Symbol;Acc:VGNC:44549]
ENSCAFG00000017725	PIK3C3	phosphatidylinositol 3-kinase catalytic subunit type 3 [Source:VGNC Symbol;Acc:VGNC:44554]
ENSCAFG00000011212	PIK3CA	phosphatidylinositol-4,5-bisphosphate 3-kinase catalytic subunit alpha [Source:VGNC Symbol;Acc:VGNC:44555]
ENSCAFG00000019735	PIK3CD	phosphatidylinositol-4,5-bisphosphate 3-kinase catalytic subunit delta [Source:VGNC Symbol;Acc:VGNC:44557]
ENSCAFG00000003977	PIK3CG	phosphatidylinositol-4,5-bisphosphate 3-kinase catalytic subunit gamma [Source:VGNC Symbol;Acc:VGNC:44558]
ENSCAFG00000007626	PIK3R1	phosphoinositide-3-kinase regulatory subunit 1 [Source:VGNC Symbol;Acc:VGNC:44560]
ENSCAFG00000013684	PIKFYVE	phosphoinositide kinase, FYVE-type zinc finger containing [Source:VGNC Symbol;Acc:VGNC:44564]
ENSCAFG00000017967	PIN1	peptidylprolyl cis/trans isomerase, NIMA-interacting 1 [Source:HGNC Symbol;Acc:HGNC:8988]
ENSCAFG00000011476	PITPNC1	phosphatidylinositol transfer protein, cytoplasmic 1 [Source:VGNC Symbol;Acc:VGNC:44585]
ENSCAFG00000001065	PITX1	paired like homeodomain 1 [Source:VGNC Symbol;Acc:VGNC:44589]
ENSCAFG00000011628	PITX2	paired like homeodomain 2 [Source:VGNC Symbol;Acc:VGNC:44590]
ENSCAFG00000031758	PITX3	paired like homeodomain 3 [Source:VGNC Symbol;Acc:VGNC:44591]
ENSCAFG00000024298	PJVK	pejvakin [Source:VGNC Symbol;Acc:VGNC:44596]
ENSCAFG00000019424	PKD1	polycystin 1, transient receptor potential channel interacting [Source:VGNC Symbol;Acc:VGNC:44597]
ENSCAFG00000016959	PKLR	pyruvate kinase L/R [Source:VGNC Symbol;Acc:VGNC:44609]
ENSCAFG00000013778	PLA2G4A	phospholipase A2 group IVA [Source:VGNC Symbol;Acc:VGNC:44626]
ENSCAFG00000001424	PLA2G6	phospholipase A2 group VI [Source:VGNC Symbol;Acc:VGNC:44631]
ENSCAFG00000000318	PLAGL1	PLAG1 like zinc finger 1 [Source:VGNC Symbol;Acc:VGNC:44639]
ENSCAFG00000015190	PLAU	urokinase-type plasminogen activator precursor [Source:RefSeq peptide;Acc:NP_001181881]
ENSCAFG00000005856	PLCB1	phospholipase C beta 1 [Source:VGNC Symbol;Acc:VGNC:44644]
ENSCAFG00000001433	PLEC	plectin [Source:VGNC Symbol;Acc:VGNC:44665]
ENSCAFG00000008664	PLEKHA7	pleckstrin homology domain containing A7 [Source:VGNC Symbol;Acc:VGNC:44671]
ENSCAFG00000019602	PLEKHG5	pleckstrin homology and RhoGEF domain containing G5 [Source:VGNC Symbol;Acc:VGNC:44680]
ENSCAFG00000016184	PLEKHM2	pleckstrin homology and RUN domain containing M2 [Source:VGNC Symbol;Acc:VGNC:44684]
ENSCAFG00000000758	PLG	Canis lupus familiaris plasminogen (PLG), mRNA. [Source:RefSeq mRNA;Acc:NM_001286960]
ENSCAFG00000029347	PLN	phospholamban [Source:VGNC Symbol;Acc:VGNC:44700]
ENSCAFG00000013860	PLOD3	procollagen-lysine,2-oxoglutarate 5-dioxygenase 3 [Source:VGNC Symbol;Acc:VGNC:44703]
ENSCAFG00000009837	PLTP	phospholipid transfer protein [Source:VGNC Symbol;Acc:VGNC:44714]
ENSCAFG00000000080	PMEL	premelanosome protein [Source:VGNC Symbol;Acc:VGNC:44730]
ENSCAFG00000019010	PMM2	phosphomannomutase 2 [Source:VGNC Symbol;Acc:VGNC:44734]
ENSCAFG00000017913	PMP22	peripheral myelin protein 22 [Source:VGNC Symbol;Acc:VGNC:44735]
ENSCAFG00000009547	PNPLA2	patatin like phospholipase domain containing 2 [Source:VGNC Symbol;Acc:VGNC:44753]
ENSCAFG00000000893	PNPLA3	patatin like phospholipase domain containing 3 [Source:VGNC Symbol;Acc:VGNC:44754]
ENSCAFG00000002891	PNPT1	polyribonucleotide nucleotidyltransferase 1 [Source:VGNC Symbol;Acc:VGNC:44760]
ENSCAFG00000010943	POGLUT1	protein O-glucosyltransferase 1 [Source:VGNC Symbol;Acc:VGNC:44769]
ENSCAFG00000005517	POLB	DNA polymerase beta [Source:VGNC Symbol;Acc:VGNC:44773]
ENSCAFG00000002937	POLD1	DNA polymerase delta 1, catalytic subunit [Source:VGNC Symbol;Acc:VGNC:44774]
ENSCAFG00000011760	POLG	DNA polymerase gamma, catalytic subunit [Source:VGNC Symbol;Acc:VGNC:44781]
ENSCAFG00000015546	POLR3A	RNA polymerase III subunit A [Source:VGNC Symbol;Acc:VGNC:44800]
ENSCAFG00000004149	POMC	proopiomelanocortin [Source:VGNC Symbol;Acc:VGNC:44808]
ENSCAFG00000004294	POMGNT1	protein O-linked mannose N-acetylglucosaminyltransferase 1 (beta 1,2-) [Source:HGNC Symbol;Acc:HGNC:19139]
ENSCAFG00000030823	POMGNT2	protein O-linked-mannose beta-1,4-N-acetylglucosaminyltransferase 2 precursor [Source:RefSeq peptide;Acc:NP_001010957]
ENSCAFG00000030110	POMK	protein-O-mannose kinase [Source:VGNC Symbol;Acc:VGNC:44809]
ENSCAFG00000019905	POMT1	protein O-mannosyltransferase 1 [Source:VGNC Symbol;Acc:VGNC:44810]
ENSCAFG00000017178	POMT2	protein O-mannosyltransferase 2 [Source:VGNC Symbol;Acc:VGNC:44811]
ENSCAFG00000002114	PON1	paraoxonase 1 [Source:VGNC Symbol;Acc:VGNC:44812]
ENSCAFG00000002123	PON2	paraoxonase 2 [Source:VGNC Symbol;Acc:VGNC:44813]
ENSCAFG00000002118	PON3	paraoxonase 3 [Source:VGNC Symbol;Acc:VGNC:44814]
ENSCAFG00000015435	PORCN	porcupine O-acyltransferase [Source:VGNC Symbol;Acc:VGNC:44821]
ENSCAFG00000006073	POSTN	periostin [Source:VGNC Symbol;Acc:VGNC:44822]
ENSCAFG00000007781	POU1F1	POU class 1 homeobox 1 [Source:VGNC Symbol;Acc:VGNC:44824]
ENSCAFG00000017368	POU3F4	POU class 3 homeobox 4 [Source:VGNC Symbol;Acc:VGNC:44830]
ENSCAFG00000007756	POU4F2	POU class 4 homeobox 2 [Source:VGNC Symbol;Acc:VGNC:44831]
ENSCAFG00000006473	POU4F3	POU class 4 homeobox 3 [Source:VGNC Symbol;Acc:VGNC:44832]
ENSCAFG00000000788	PPARA	peroxisome proliferator activated receptor alpha [Source:VGNC Symbol;Acc:VGNC:44834]
ENSCAFG00000001310	PPARD	peroxisome proliferator activated receptor delta [Source:VGNC Symbol;Acc:VGNC:44835]
ENSCAFG00000004991	PPARG	peroxisome proliferator activated receptor gamma [Source:VGNC Symbol;Acc:VGNC:44836]
ENSCAFG00000016519	PPARGC1A	PPARG coactivator 1 alpha [Source:VGNC Symbol;Acc:VGNC:44837]
ENSCAFG00000018275	PPARGC1B	PPARG coactivator 1 beta [Source:VGNC Symbol;Acc:VGNC:44838]
ENSCAFG00000005854	PPFIA2	PTPRF interacting protein alpha 2 [Source:VGNC Symbol;Acc:VGNC:44844]
ENSCAFG00000005779	PPP1R12A	protein phosphatase 1 regulatory subunit 12A [Source:VGNC Symbol;Acc:VGNC:44878]
ENSCAFG00000010497	PPP1R12B	protein phosphatase 1 regulatory subunit 12B [Source:VGNC Symbol;Acc:VGNC:44879]
ENSCAFG00000003339	PPP1R3A	protein phosphatase 1 regulatory subunit 3A [Source:VGNC Symbol;Acc:VGNC:44896]
ENSCAFG00000010644	PPP3CA	protein phosphatase 3 catalytic subunit alpha [Source:VGNC Symbol;Acc:VGNC:44918]
ENSCAFG00000003004	PPT1	palmitoyl-protein thioesterase 1 [Source:VGNC Symbol;Acc:VGNC:44929]
ENSCAFG00000000766	PPT2	palmitoyl-protein thioesterase 2 [Source:VGNC Symbol;Acc:VGNC:44930]
ENSCAFG00000019473	PRDM16	PR/SET domain 16 [Source:VGNC Symbol;Acc:VGNC:44948]
ENSCAFG00000012109	PRDX3	N/A
ENSCAFG00000013369	PRDX4	peroxiredoxin 4 [Source:VGNC Symbol;Acc:VGNC:44952]
ENSCAFG00000018614	PRKAA1	protein kinase AMP-activated catalytic subunit alpha 1 [Source:HGNC Symbol;Acc:HGNC:9376]
ENSCAFG00000010859	PRKAB2	protein kinase AMP-activated non-catalytic subunit beta 2 [Source:VGNC Symbol;Acc:VGNC:44970]
ENSCAFG00000016488	PRKACA	cAMP-dependent protein kinase catalytic subunit alpha [Source:RefSeq peptide;Acc:NP_001003032]
ENSCAFG00000004912	PRKAG2	protein kinase AMP-activated non-catalytic subunit gamma 2 [Source:VGNC Symbol;Acc:VGNC:44973]
ENSCAFG00000011326	PRKCA	protein kinase C alpha [Source:VGNC Symbol;Acc:VGNC:44978]
ENSCAFG00000017622	PRKCB	protein kinase C beta [Source:HGNC Symbol;Acc:HGNC:9395]
ENSCAFG00000005169	PRKCQ	protein kinase C theta [Source:VGNC Symbol;Acc:VGNC:44983]
ENSCAFG00000012553	PRKD1	protein kinase D1 [Source:VGNC Symbol;Acc:VGNC:44986]
ENSCAFG00000010247	PRL	prolactin [Source:VGNC Symbol;Acc:VGNC:44992]
ENSCAFG00000004493	PROC	protein C, inactivator of coagulation factors Va and VIIIa [Source:VGNC Symbol;Acc:VGNC:45006]
ENSCAFG00000015233	PROM1	prominin 1 [Source:VGNC Symbol;Acc:VGNC:45012]
ENSCAFG00000000268	PROP1	PROP paired-like homeobox 1 [Source:VGNC Symbol;Acc:VGNC:45014]
ENSCAFG00000008999	PROS1	protein S [Source:HGNC Symbol;Acc:HGNC:9456]
ENSCAFG00000012445	PROX1	prospero homeobox 1 [Source:VGNC Symbol;Acc:VGNC:45017]
ENSCAFG00000009381	PRPF4B	pre-mRNA processing factor 4B [Source:VGNC Symbol;Acc:VGNC:45028]
ENSCAFG00000008623	PRPH	peripherin [Source:VGNC Symbol;Acc:VGNC:45031]
ENSCAFG00000017976	PRPS1	phosphoribosyl pyrophosphate synthetase 1 [Source:HGNC Symbol;Acc:HGNC:9462]
ENSCAFG00000000533	PRRC2A	proline rich coiled-coil 2A [Source:VGNC Symbol;Acc:VGNC:45052]
ENSCAFG00000011227	PRSS56	protease, serine 56 [Source:VGNC Symbol;Acc:VGNC:45073]
ENSCAFG00000005350	PRX	periaxin [Source:VGNC Symbol;Acc:VGNC:45079]
ENSCAFG00000016815	PSEN1	presenilin 1 [Source:VGNC Symbol;Acc:VGNC:45085]
ENSCAFG00000016039	PSEN2	presenilin 2 [Source:VGNC Symbol;Acc:VGNC:45086]
ENSCAFG00000011453	PSMD12	proteasome 26S subunit, non-ATPase 12 [Source:VGNC Symbol;Acc:VGNC:45108]
ENSCAFG00000001246	PTCH1	patched 1 [Source:HGNC Symbol;Acc:HGNC:9585]
ENSCAFG00000015670	PTEN	phosphatase and tensin homolog [Source:VGNC Symbol;Acc:VGNC:45138]
ENSCAFG00000004216	PTF1A	pancreas specific transcription factor, 1a [Source:HGNC Symbol;Acc:HGNC:23734]
ENSCAFG00000014692	PTGDR	prostaglandin D2 receptor [Source:VGNC Symbol;Acc:VGNC:45140]
ENSCAFG00000016454	PTGDR2	prostaglandin D2 receptor 2 [Source:VGNC Symbol;Acc:VGNC:45141]
ENSCAFG00000019533	PTGDS	Prostaglandin-H2 D-isomerase [Source:UniProtKB/Swiss-Prot;Acc:Q9XS65]
ENSCAFG00000018619	PTGER4	prostaglandin E receptor 4 [Source:VGNC Symbol;Acc:VGNC:45144]
ENSCAFG00000020089	PTGES2	prostaglandin E synthase 2 [Source:VGNC Symbol;Acc:VGNC:45146]
ENSCAFG00000020345	PTGFR	prostaglandin F receptor [Source:VGNC Symbol;Acc:VGNC:45147]
ENSCAFG00000020263	PTGS1	prostaglandin-endoperoxide synthase 1 [Source:VGNC Symbol;Acc:VGNC:45151]
ENSCAFG00000013762	PTGS2	prostaglandin-endoperoxide synthase 2 [Source:VGNC Symbol;Acc:VGNC:45152]
ENSCAFG00000008177	PTH	parathyroid hormone [Source:VGNC Symbol;Acc:VGNC:45153]
ENSCAFG00000001217	PTK2	protein tyrosine kinase 2 [Source:VGNC Symbol;Acc:VGNC:45158]
ENSCAFG00000008670	PTK2B	protein tyrosine kinase 2 beta [Source:VGNC Symbol;Acc:VGNC:45159]
ENSCAFG00000011531	PTPN1	protein tyrosine phosphatase, non-receptor type 1 [Source:VGNC Symbol;Acc:VGNC:45167]
ENSCAFG00000008894	PTPN11	protein tyrosine phosphatase, non-receptor type 11 [Source:VGNC Symbol;Acc:VGNC:45168]
ENSCAFG00000018862	PTPN2	protein tyrosine phosphatase, non-receptor type 2 [Source:VGNC Symbol;Acc:VGNC:45172]
ENSCAFG00000009255	PTPN22	protein tyrosine phosphatase, non-receptor type 22 [Source:VGNC Symbol;Acc:VGNC:45175]
ENSCAFG00000007152	PTPRG	protein tyrosine phosphatase, receptor type G [Source:VGNC Symbol;Acc:VGNC:45188]
ENSCAFG00000008279	PTPRJ	protein tyrosine phosphatase, receptor type J [Source:VGNC Symbol;Acc:VGNC:45190]
ENSCAFG00000015244	PTPRN	protein tyrosine phosphatase, receptor type N [Source:VGNC Symbol;Acc:VGNC:45193]
ENSCAFG00000032520	PTPRN2	protein tyrosine phosphatase, receptor type N2 [Source:VGNC Symbol;Acc:VGNC:45194]
ENSCAFG00000005801	PTPRQ	protein tyrosine phosphatase, receptor type Q [Source:VGNC Symbol;Acc:VGNC:45196]
ENSCAFG00000018859	PTPRS	protein tyrosine phosphatase, receptor type S [Source:VGNC Symbol;Acc:VGNC:45198]
ENSCAFG00000009280	PTPRT	protein tyrosine phosphatase, receptor type T [Source:VGNC Symbol;Acc:VGNC:45199]
ENSCAFG00000017662	PTRH2	peptidyl-tRNA hydrolase 2 [Source:VGNC Symbol;Acc:VGNC:45202]
ENSCAFG00000001525	PVALB	parvalbumin [Source:VGNC Symbol;Acc:VGNC:45214]
ENSCAFG00000003228	PXDN	peroxidasin [Source:VGNC Symbol;Acc:VGNC:45217]
ENSCAFG00000004380	PYGB	glycogen phosphorylase B [Source:HGNC Symbol;Acc:HGNC:9723]
ENSCAFG00000006145	QPCT	glutaminyl-peptide cyclotransferase [Source:VGNC Symbol;Acc:VGNC:45233]
ENSCAFG00000015916	RAB27A	RAB27A, member RAS oncogene family [Source:VGNC Symbol;Acc:VGNC:45267]
ENSCAFG00000019640	RAB39B	RAB39B, member RAS oncogene family [Source:VGNC Symbol;Acc:VGNC:45281]
ENSCAFG00000004157	RAB7A	RAB7A, member RAS oncogene family [Source:VGNC Symbol;Acc:VGNC:45293]
ENSCAFG00000015716	RAC1	ras-related C3 botulinum toxin substrate 1 precursor [Source:RefSeq peptide;Acc:NP_001003274]
ENSCAFG00000009220	RAD51	RAD51 recombinase [Source:VGNC Symbol;Acc:VGNC:45317]
ENSCAFG00000004951	RAF1	Raf-1 proto-oncogene, serine/threonine kinase [Source:VGNC Symbol;Acc:VGNC:45325]
ENSCAFG00000018437	RAI1	retinoic acid induced 1 [Source:VGNC Symbol;Acc:VGNC:45328]
ENSCAFG00000008690	RAPSN	receptor associated protein of the synapse [Source:VGNC Symbol;Acc:VGNC:45350]
ENSCAFG00000016060	RARA	retinoic acid receptor alpha [Source:VGNC Symbol;Acc:VGNC:45351]
ENSCAFG00000005727	RARB	retinoic acid receptor beta [Source:VGNC Symbol;Acc:VGNC:45352]
ENSCAFG00000004555	RARRES2	retinoic acid receptor responder 2 [Source:VGNC Symbol;Acc:VGNC:45355]
ENSCAFG00000000098	RAX	retina and anterior neural fold homeobox [Source:HGNC Symbol;Acc:HGNC:18662]
ENSCAFG00000004436	RB1	RB transcriptional corepressor 1 [Source:VGNC Symbol;Acc:VGNC:45389]
ENSCAFG00000019082	RBFOX1	RNA binding fox-1 homolog 1 [Source:VGNC Symbol;Acc:VGNC:45398]
ENSCAFG00000019789	RBM15	RNA binding motif protein 15 [Source:VGNC Symbol;Acc:VGNC:45409]
ENSCAFG00000010785	RBM20	RNA binding motif protein 20 [Source:VGNC Symbol;Acc:VGNC:45414]
ENSCAFG00000018770	RBMX2	RNA binding motif protein, X-linked 2 [Source:HGNC Symbol;Acc:HGNC:24282]
ENSCAFG00000023697	RBP3	retinol binding protein 3 [Source:VGNC Symbol;Acc:VGNC:45431]
ENSCAFG00000007893	RBP4	retinol binding protein 4 [Source:VGNC Symbol;Acc:VGNC:45432]
ENSCAFG00000032114	RCE1	Ras converting CAAX endopeptidase 1 [Source:HGNC Symbol;Acc:HGNC:13721]
ENSCAFG00000018077	RCN2	reticulocalbin 2 [Source:HGNC Symbol;Acc:HGNC:9935]
ENSCAFG00000014273	RDX	radixin [Source:VGNC Symbol;Acc:VGNC:45455]
ENSCAFG00000008130	REG3A	N/A
ENSCAFG00000013334	RELA	RELA proto-oncogene, NF-kB subunit [Source:VGNC Symbol;Acc:VGNC:45466]
ENSCAFG00000025345	RELN	reelin [Source:VGNC Symbol;Acc:VGNC:45470]
ENSCAFG00000009623	REN	renin [Source:VGNC Symbol;Acc:VGNC:45474]
ENSCAFG00000018307	RETN	resistin [Source:VGNC Symbol;Acc:VGNC:45482]
ENSCAFG00000019100	RETREG1	reticulophagy regulator 1 [Source:VGNC Symbol;Acc:VGNC:45483]
ENSCAFG00000005873	RFTN1	raftlin, lipid raft linker 1 [Source:VGNC Symbol;Acc:VGNC:45500]
ENSCAFG00000002053	RFX3	regulatory factor X3 [Source:VGNC Symbol;Acc:VGNC:45505]
ENSCAFG00000016029	RFX7	regulatory factor X7 [Source:VGNC Symbol;Acc:VGNC:45509]
ENSCAFG00000010973	RGMA	repulsive guidance molecule family member a [Source:VGNC Symbol;Acc:VGNC:45515]
ENSCAFG00000014821	RGN	regucalcin [Source:VGNC Symbol;Acc:VGNC:45516]
ENSCAFG00000010595	RGS2	regulator of G protein signaling 2 [Source:VGNC Symbol;Acc:VGNC:45529]
ENSCAFG00000016763	RGS6	regulator of G protein signaling 6 [Source:VGNC Symbol;Acc:VGNC:45535]
ENSCAFG00000012832	RH30	N/A
ENSCAFG00000004633	RHO	Rhodopsin [Source:VGNC Symbol;Acc:VGNC:45554]
ENSCAFG00000023066	RHOA	N/A
ENSCAFG00000010457	RIPOR2	RHO family interacting cell polarization regulator 2 [Source:VGNC Symbol;Acc:VGNC:45597]
ENSCAFG00000016911	RIT1	Ras like without CAAX 1 [Source:VGNC Symbol;Acc:VGNC:45600]
ENSCAFG00000030804	RNLS	renalase, FAD dependent amine oxidase [Source:VGNC Symbol;Acc:VGNC:45681]
ENSCAFG00000018282	ROCK1	Rho associated coiled-coil containing protein kinase 1 [Source:VGNC Symbol;Acc:VGNC:45688]
ENSCAFG00000003549	ROCK2	Rho associated coiled-coil containing protein kinase 2 [Source:HGNC Symbol;Acc:HGNC:10252]
ENSCAFG00000018635	ROR1	receptor tyrosine kinase like orphan receptor 1 [Source:VGNC Symbol;Acc:VGNC:45693]
ENSCAFG00000016700	RORA	RAR related orphan receptor A [Source:VGNC Symbol;Acc:VGNC:45695]
ENSCAFG00000014003	RPGR	X-linked retinitis pigmentosa GTPase regulator [Source:RefSeq peptide;Acc:NP_001003126]
ENSCAFG00000005511	RPGRIP1	Canis lupus familiaris RPGR interacting protein 1 (RPGRIP1), mRNA. [Source:RefSeq mRNA;Acc:NM_001313773]
ENSCAFG00000012408	RPS6KA1	ribosomal protein S6 kinase A1 [Source:VGNC Symbol;Acc:VGNC:45738]
ENSCAFG00000017373	RPS6KA6	ribosomal protein S6 kinase A6 [Source:VGNC Symbol;Acc:VGNC:45743]
ENSCAFG00000017679	RPS6KB1	ribosomal protein S6 kinase B1 [Source:VGNC Symbol;Acc:VGNC:45744]
ENSCAFG00000009241	RSBN1	round spermatid basic protein 1 [Source:VGNC Symbol;Acc:VGNC:45771]
ENSCAFG00000010420	RSPH1	radial spoke head 1 homolog [Source:VGNC Symbol;Acc:VGNC:45777]
ENSCAFG00000000664	RSPH3	radial spoke head 3 homolog [Source:VGNC Symbol;Acc:VGNC:45779]
ENSCAFG00000000897	RSPH4A	radial spoke head 4 homolog A [Source:VGNC Symbol;Acc:VGNC:45780]
ENSCAFG00000004383	RSPH6A	radial spoke head 6 homolog A [Source:VGNC Symbol;Acc:VGNC:45781]
ENSCAFG00000012903	RUNX3	runt related transcription factor 3 [Source:HGNC Symbol;Acc:HGNC:10473]
ENSCAFG00000019838	RXRA	retinoid X receptor alpha [Source:VGNC Symbol;Acc:VGNC:45817]
ENSCAFG00000005896	RYR1	ryanodine receptor 1 [Source:VGNC Symbol;Acc:VGNC:45821]
ENSCAFG00000010034	RYR2	ryanodine receptor 2 [Source:VGNC Symbol;Acc:VGNC:45822]
ENSCAFG00000023324	S100A12	S100 calcium binding protein A12 [Source:VGNC Symbol;Acc:VGNC:45824]
ENSCAFG00000017557	S100A8	S100 calcium binding protein A8 [Source:VGNC Symbol;Acc:VGNC:45833]
ENSCAFG00000012228	S100B	S100 calcium binding protein B [Source:HGNC Symbol;Acc:HGNC:10500]
ENSCAFG00000002204	S1PR3	sphingosine-1-phosphate receptor 3 [Source:VGNC Symbol;Acc:VGNC:45837]
ENSCAFG00000007146	SACS	sacsin molecular chaperone [Source:VGNC Symbol;Acc:VGNC:45842]
ENSCAFG00000009755	SALL1	spalt like transcription factor 1 [Source:VGNC Symbol;Acc:VGNC:45847]
ENSCAFG00000007500	SBF2	SET binding factor 2 [Source:VGNC Symbol;Acc:VGNC:45882]
ENSCAFG00000008611	SCARB2	scavenger receptor class B member 2 [Source:VGNC Symbol;Acc:VGNC:45899]
ENSCAFG00000002031	SCFD2	Sec1 family domain containing 2 [Source:VGNC Symbol;Acc:VGNC:45904]
ENSCAFG00000005056	SCN10A	sodium voltage-gated channel alpha subunit 10 [Source:VGNC Symbol;Acc:VGNC:45913]
ENSCAFG00000005058	SCN1A	sodium voltage-gated channel alpha subunit 1 [Source:VGNC Symbol;Acc:VGNC:45915]
ENSCAFG00000011130	SCN2A	sodium voltage-gated channel alpha subunit 2 [Source:HGNC Symbol;Acc:HGNC:10588]
ENSCAFG00000011538	SCN3B	sodium voltage-gated channel beta subunit 3 [Source:VGNC Symbol;Acc:VGNC:45919]
ENSCAFG00000012824	SCN4B	sodium voltage-gated channel beta subunit 4 [Source:HGNC Symbol;Acc:HGNC:10592]
ENSCAFG00000005051	SCN5A	sodium voltage-gated channel alpha subunit 5 [Source:VGNC Symbol;Acc:VGNC:45921]
ENSCAFG00000011438	SCN9A	sodium voltage-gated channel alpha subunit 9 [Source:VGNC Symbol;Acc:VGNC:45924]
ENSCAFG00000015196	SCNN1A	sodium channel epithelial 1 alpha subunit [Source:VGNC Symbol;Acc:VGNC:45925]
ENSCAFG00000032704	SCO1	SCO1, cytochrome c oxidase assembly protein [Source:VGNC Symbol;Acc:VGNC:45929]
ENSCAFG00000017404	SCPEP1	serine carboxypeptidase 1 [Source:HGNC Symbol;Acc:HGNC:29507]
ENSCAFG00000011234	SDC3	syndecan 3 [Source:VGNC Symbol;Acc:VGNC:45943]
ENSCAFG00000010951	SDHA	succinate dehydrogenase complex flavoprotein subunit A [Source:VGNC Symbol;Acc:VGNC:45949]
ENSCAFG00000015169	SELE	selectin E [Source:VGNC Symbol;Acc:VGNC:45980]
ENSCAFG00000010575	SELENOS	selenoprotein S [Source:VGNC Symbol;Acc:VGNC:45983]
ENSCAFG00000015177	SELL	selectin L [Source:HGNC Symbol;Acc:HGNC:10720]
ENSCAFG00000015180	SELP	selectin P [Source:VGNC Symbol;Acc:VGNC:45985]
ENSCAFG00000006212	SEMA3A	semaphorin 3A [Source:VGNC Symbol;Acc:VGNC:45987]
ENSCAFG00000006247	SEMA3E	semaphorin 3E [Source:VGNC Symbol;Acc:VGNC:45991]
ENSCAFG00000009045	SENP1	SUMO1/sentrin specific peptidase 1 [Source:VGNC Symbol;Acc:VGNC:46005]
ENSCAFG00000000647	SERAC1	serine active site containing 1 [Source:VGNC Symbol;Acc:VGNC:46017]
ENSCAFG00000017646	SERPINA1	serpin family A member 1 [Source:HGNC Symbol;Acc:HGNC:8941]
ENSCAFG00000017661	SERPINA12	serpin family A member 12 [Source:HGNC Symbol;Acc:HGNC:18359]
ENSCAFG00000025512	SERPINB6	serpin family B member 6 [Source:HGNC Symbol;Acc:HGNC:8950]
ENSCAFG00000013909	SERPINE1	serpin family E member 1 [Source:VGNC Symbol;Acc:VGNC:46036]
ENSCAFG00000024189	SERPINF1	serpin family F member 1 [Source:VGNC Symbol;Acc:VGNC:46039]
ENSCAFG00000019897	SETX	senataxin [Source:VGNC Symbol;Acc:VGNC:46062]
ENSCAFG00000005737	SFRP1	secreted frizzled related protein 1 [Source:VGNC Symbol;Acc:VGNC:46080]
ENSCAFG00000003646	SFRP4	secreted frizzled related protein 4 [Source:VGNC Symbol;Acc:VGNC:46082]
ENSCAFG00000009259	SFRP5	secreted frizzled related protein 5 [Source:VGNC Symbol;Acc:VGNC:46083]
ENSCAFG00000007658	SFTPB	surfactant protein B [Source:HGNC Symbol;Acc:HGNC:10801]
ENSCAFG00000009613	SFTPC	surfactant protein C [Source:HGNC Symbol;Acc:HGNC:10802]
ENSCAFG00000015753	SFTPD	surfactant protein D [Source:VGNC Symbol;Acc:VGNC:46086]
ENSCAFG00000017013	SGCA	sarcoglycan alpha [Source:VGNC Symbol;Acc:VGNC:46091]
ENSCAFG00000002001	SGCB	sarcoglycan beta [Source:VGNC Symbol;Acc:VGNC:46092]
ENSCAFG00000017592	SGCD	sarcoglycan delta [Source:VGNC Symbol;Acc:VGNC:46093]
ENSCAFG00000002104	SGCE	sarcoglycan epsilon [Source:VGNC Symbol;Acc:VGNC:46094]
ENSCAFG00000007161	SGCG	sarcoglycan gamma [Source:VGNC Symbol;Acc:VGNC:46095]
ENSCAFG00000006792	SGCZ	sarcoglycan zeta [Source:HGNC Symbol;Acc:HGNC:14075]
ENSCAFG00000000217	SGK1	serum/glucocorticoid regulated kinase 1 [Source:VGNC Symbol;Acc:VGNC:46097]
ENSCAFG00000023763	SGPP2	sphingosine-1-phosphate phosphatase 2 [Source:HGNC Symbol;Acc:HGNC:19953]
ENSCAFG00000008601	SH2B3	SH2B adaptor protein 3 [Source:VGNC Symbol;Acc:VGNC:46110]
ENSCAFG00000014831	SH3BP2	SH3 domain binding protein 2 [Source:VGNC Symbol;Acc:VGNC:46118]
ENSCAFG00000016825	SH3PXD2B	SH3 and PX domains 2B [Source:VGNC Symbol;Acc:VGNC:46131]
ENSCAFG00000018334	SH3TC2	SH3 domain and tetratricopeptide repeats 2 [Source:VGNC Symbol;Acc:VGNC:46136]
ENSCAFG00000016692	SHBG	sex hormone binding globulin [Source:VGNC Symbol;Acc:VGNC:46139]
ENSCAFG00000017156	SHC1	SHC adaptor protein 1 [Source:VGNC Symbol;Acc:VGNC:46140]
ENSCAFG00000029968	SHH	sonic hedgehog [Source:VGNC Symbol;Acc:VGNC:46147]
ENSCAFG00000011184	SIAE	sialic acid acetylesterase [Source:VGNC Symbol;Acc:VGNC:46162]
ENSCAFG00000011665	SIPA1L2	signal induced proliferation associated 1 like 2 [Source:VGNC Symbol;Acc:VGNC:46181]
ENSCAFG00000005973	SIPA1L3	signal induced proliferation associated 1 like 3 [Source:VGNC Symbol;Acc:VGNC:46182]
ENSCAFG00000013316	SIRT1	sirtuin 1 [Source:VGNC Symbol;Acc:VGNC:46183]
ENSCAFG00000019123	SIRT6	sirtuin 6 [Source:VGNC Symbol;Acc:VGNC:46187]
ENSCAFG00000029797	SIX1	SIX homeobox 1 [Source:VGNC Symbol;Acc:VGNC:46190]
ENSCAFG00000002547	SIX3	SIX homeobox 3 [Source:HGNC Symbol;Acc:HGNC:10889]
ENSCAFG00000015619	SIX6	SIX homeobox 6 [Source:HGNC Symbol;Acc:HGNC:10892]
ENSCAFG00000019387	SKI	SKI proto-oncogene [Source:VGNC Symbol;Acc:VGNC:46198]
ENSCAFG00000006008	SLC10A2	solute carrier family 10 member 2 [Source:VGNC Symbol;Acc:VGNC:46212]
ENSCAFG00000014645	SLC11A1	solute carrier family 11 member 1 [Source:VGNC Symbol;Acc:VGNC:46216]
ENSCAFG00000009931	SLC12A5	solute carrier family 12 member 5 [Source:VGNC Symbol;Acc:VGNC:46222]
ENSCAFG00000007885	SLC12A6	solute carrier family 12 member 6 [Source:VGNC Symbol;Acc:VGNC:46223]
ENSCAFG00000010793	SLC12A7	solute carrier family 12 member 7 [Source:VGNC Symbol;Acc:VGNC:46224]
ENSCAFG00000017672	SLC14A2	solute carrier family 14 member 2 [Source:HGNC Symbol;Acc:HGNC:10919]
ENSCAFG00000007158	SLC16A12	solute carrier family 16 member 12 [Source:VGNC Symbol;Acc:VGNC:46238]
ENSCAFG00000017195	SLC16A2	solute carrier family 16 member 2 [Source:VGNC Symbol;Acc:VGNC:46241]
ENSCAFG00000006786	SLC17A8	solute carrier family 17 member 8 [Source:VGNC Symbol;Acc:VGNC:46253]
ENSCAFG00000012759	SLC17A9	solute carrier family 17 member 9 [Source:VGNC Symbol;Acc:VGNC:46254]
ENSCAFG00000015235	SLC19A2	solute carrier family 19 member 2 [Source:VGNC Symbol;Acc:VGNC:46260]
ENSCAFG00000002067	SLC1A1	solute carrier family 1 member 1 [Source:VGNC Symbol;Acc:VGNC:46261]
ENSCAFG00000006881	SLC1A2	solute carrier family 1 member 2 [Source:VGNC Symbol;Acc:VGNC:46262]
ENSCAFG00000018704	SLC1A3	solute carrier family 1 member 3 [Source:VGNC Symbol;Acc:VGNC:46263]
ENSCAFG00000000757	SLC22A2	Canis lupus familiaris solute carrier family 22 (organic cation transporter), member 2 (SLC22A2), mRNA. [Source:RefSeq mRNA;Acc:NM_001286961]
ENSCAFG00000000840	SLC22A4	solute carrier family 22 member 4 [Source:HGNC Symbol;Acc:HGNC:10968]
ENSCAFG00000006042	SLC23A2	solute carrier family 23 member 2 [Source:VGNC Symbol;Acc:VGNC:46283]
ENSCAFG00000007596	SLC25A4	solute carrier family 25 member 4 [Source:HGNC Symbol;Acc:HGNC:10990]
ENSCAFG00000007396	SLC25A46	solute carrier family 25 member 46 [Source:VGNC Symbol;Acc:VGNC:46316]
ENSCAFG00000016706	SLC26A1	solute carrier family 26 member 1 [Source:VGNC Symbol;Acc:VGNC:46320]
ENSCAFG00000018240	SLC26A2	Solute carrier family 26 member 2 [Source:VGNC Symbol;Acc:VGNC:46322]
ENSCAFG00000003891	SLC26A4	solute carrier family 26 member 4 [Source:VGNC Symbol;Acc:VGNC:46324]
ENSCAFG00000004181	SLC26A5	solute carrier family 26 member 5 [Source:VGNC Symbol;Acc:VGNC:46325]
ENSCAFG00000014339	SLC29A3	solute carrier family 29 member 3 [Source:VGNC Symbol;Acc:VGNC:46335]
ENSCAFG00000002500	SLC2A1	solute carrier family 2 member 1 [Source:VGNC Symbol;Acc:VGNC:46337]
ENSCAFG00000014983	SLC2A2	solute carrier family 2 member 2 [Source:VGNC Symbol;Acc:VGNC:46341]
ENSCAFG00000013918	SLC2A3	N/A
ENSCAFG00000016126	SLC2A4	solute carrier family 2 member 4 [Source:HGNC Symbol;Acc:HGNC:11009]
ENSCAFG00000015634	SLC2A9	solute carrier family 2 member 9 [Source:VGNC Symbol;Acc:VGNC:46345]
ENSCAFG00000000825	SLC30A8	solute carrier family 30 member 8 [Source:VGNC Symbol;Acc:VGNC:46353]
ENSCAFG00000015495	SLC3A2	Canis lupus familiaris solute carrier family 3 member 2 (SLC3A2), mRNA. [Source:RefSeq mRNA;Acc:NM_001314120]
ENSCAFG00000009343	SLC40A1	solute carrier family 40 member 1 [Source:VGNC Symbol;Acc:VGNC:46411]
ENSCAFG00000000658	SLC44A4	solute carrier family 44 member 4 [Source:VGNC Symbol;Acc:VGNC:46420]
ENSCAFG00000010242	SLC4A10	solute carrier family 4 member 10 [Source:VGNC Symbol;Acc:VGNC:46430]
ENSCAFG00000006389	SLC4A11	solute carrier family 4 member 11 [Source:VGNC Symbol;Acc:VGNC:46431]
ENSCAFG00000002939	SLC4A4	solute carrier family 4 member 4 [Source:VGNC Symbol;Acc:VGNC:46434]
ENSCAFG00000013439	SLC5A1	Solute carrier family 5 member 1 [Source:VGNC Symbol;Acc:VGNC:52969]
ENSCAFG00000009546	SLC5A3	Canis lupus familiaris solute carrier family 5 member 3 (SLC5A3), mRNA. [Source:RefSeq mRNA;Acc:NM_001195140]
ENSCAFG00000015051	SLC5A5	solute carrier family 5 member 5 [Source:VGNC Symbol;Acc:VGNC:46448]
ENSCAFG00000023412	SLC6A11	solute carrier family 6 member 11 [Source:VGNC Symbol;Acc:VGNC:46454]
ENSCAFG00000010574	SLC6A3	solute carrier family 6 member 3 [Source:VGNC Symbol;Acc:VGNC:46464]
ENSCAFG00000018990	SLC6A4	solute carrier family 6 member 4 [Source:VGNC Symbol;Acc:VGNC:46465]
ENSCAFG00000006660	SLC7A1	solute carrier family 7 member 1 [Source:VGNC Symbol;Acc:VGNC:46470]
ENSCAFG00000006944	SLC7A2	solute carrier family 7 member 2 [Source:VGNC Symbol;Acc:VGNC:46474]
ENSCAFG00000012207	SLC9A1	sodium/hydrogen exchanger 1 [Source:RefSeq peptide;Acc:NP_001273957]
ENSCAFG00000010447	SLC9C1	solute carrier family 9 member C1 [Source:VGNC Symbol;Acc:VGNC:46492]
ENSCAFG00000005289	SLITRK6	SLIT and NTRK like family member 6 [Source:VGNC Symbol;Acc:VGNC:46511]
ENSCAFG00000007659	SMAD1	SMAD family member 1 [Source:VGNC Symbol;Acc:VGNC:46518]
ENSCAFG00000017567	SMAD2	SMAD family member 2 [Source:VGNC Symbol;Acc:VGNC:46519]
ENSCAFG00000017388	SMAD3	SMAD family member 3 [Source:VGNC Symbol;Acc:VGNC:46520]
ENSCAFG00000000164	SMAD4	SMAD family member 4 [Source:VGNC Symbol;Acc:VGNC:46521]
ENSCAFG00000001094	SMAD5	SMAD family member 5 [Source:VGNC Symbol;Acc:VGNC:46522]
ENSCAFG00000017584	SMARCA4	SWI/SNF related, matrix associated, actin dependent regulator of chromatin, subfamily a, member 4 [Source:VGNC Symbol;Acc:VGNC:46530]
ENSCAFG00000001880	SMC5	structural maintenance of chromosomes 5 [Source:VGNC Symbol;Acc:VGNC:46546]
ENSCAFG00000018420	SMCHD1	structural maintenance of chromosomes flexible hinge domain containing 1 [Source:VGNC Symbol;Acc:VGNC:46548]
ENSCAFG00000007812	SMN	survival motor neuron protein [Source:RefSeq peptide;Acc:NP_001003226]
ENSCAFG00000016602	SMOC1	SPARC related modular calcium binding 1 [Source:VGNC Symbol;Acc:VGNC:46566]
ENSCAFG00000006411	SMPD1	sphingomyelin phosphodiesterase 1 [Source:VGNC Symbol;Acc:VGNC:46569]
ENSCAFG00000013262	SMPX	small muscle protein, X-linked [Source:HGNC Symbol;Acc:HGNC:11122]
ENSCAFG00000006638	SNAI2	snail family transcriptional repressor 2 [Source:VGNC Symbol;Acc:VGNC:46585]
ENSCAFG00000005662	SNAP25	synaptosome associated protein 25 [Source:VGNC Symbol;Acc:VGNC:46588]
ENSCAFG00000016091	SNCG	synuclein gamma [Source:VGNC Symbol;Acc:VGNC:46599]
ENSCAFG00000007410	SNTA1	syntrophin alpha 1 [Source:HGNC Symbol;Acc:HGNC:11167]
ENSCAFG00000000957	SNTB1	syntrophin beta 1 [Source:VGNC Symbol;Acc:VGNC:46613]
ENSCAFG00000020288	SNTB2	syntrophin beta 2 [Source:VGNC Symbol;Acc:VGNC:46614]
ENSCAFG00000003772	SNX3	sorting nexin 3 [Source:VGNC Symbol;Acc:VGNC:46636]
ENSCAFG00000018916	SOCS1	suppressor of cytokine signaling 1 [Source:VGNC Symbol;Acc:VGNC:46648]
ENSCAFG00000006180	SOCS2	suppressor of cytokine signaling 2 [Source:VGNC Symbol;Acc:VGNC:46649]
ENSCAFG00000005306	SOCS3	suppressor of cytokine signaling 3 [Source:VGNC Symbol;Acc:VGNC:46650]
ENSCAFG00000008859	SOD1	superoxide dismutase 1 [Source:VGNC Symbol;Acc:VGNC:46653]
ENSCAFG00000000671	SOD2	superoxide dismutase 2 [Source:HGNC Symbol;Acc:HGNC:11180]
ENSCAFG00000016498	SOD3	superoxide dismutase 3 [Source:VGNC Symbol;Acc:VGNC:46654]
ENSCAFG00000010628	SORCS1	sortilin related VPS10 domain containing receptor 1 [Source:VGNC Symbol;Acc:VGNC:46659]
ENSCAFG00000011745	SORL1	sortilin related receptor 1 [Source:VGNC Symbol;Acc:VGNC:46663]
ENSCAFG00000006340	SOS1	SOS Ras/Rac guanine nucleotide exchange factor 1 [Source:VGNC Symbol;Acc:VGNC:46665]
ENSCAFG00000028730	SOST	sclerostin [Source:VGNC Symbol;Acc:VGNC:46667]
ENSCAFG00000002426	SOSTDC1	sclerostin domain containing 1 [Source:VGNC Symbol;Acc:VGNC:46668]
ENSCAFG00000001436	SOX10	SRY-box 10 [Source:VGNC Symbol;Acc:VGNC:46672]
ENSCAFG00000011642	SOX2	SRY-box 2 [Source:VGNC Symbol;Acc:VGNC:46678]
ENSCAFG00000004374	SOX9	SRY-box 9 [Source:VGNC Symbol;Acc:VGNC:46684]
ENSCAFG00000009951	SPAG17	sperm associated antigen 17 [Source:VGNC Symbol;Acc:VGNC:46695]
ENSCAFG00000017855	SPARC	secreted protein acidic and cysteine rich [Source:VGNC Symbol;Acc:VGNC:46701]
ENSCAFG00000018767	SPEF2	sperm flagellar 2 [Source:VGNC Symbol;Acc:VGNC:46731]
ENSCAFG00000015503	SPEG	striated muscle preferentially expressed protein kinase [Source:RefSeq peptide;Acc:NP_001166949]
ENSCAFG00000008723	SPI1	Spi-1 proto-oncogene [Source:HGNC Symbol;Acc:HGNC:11241]
ENSCAFG00000006647	SPINK1	Serine protease inhibitor Kazal-type 1 [Source:UniProtKB/Swiss-Prot;Acc:P04542]
ENSCAFG00000006674	SPINK5	serine peptidase inhibitor, Kazal type 5 [Source:VGNC Symbol;Acc:VGNC:46745]
ENSCAFG00000009569	SPP1	secreted phosphoprotein 1 [Source:VGNC Symbol;Acc:VGNC:46756]
ENSCAFG00000020049	SPTAN1	spectrin alpha, non-erythrocytic 1 [Source:VGNC Symbol;Acc:VGNC:46773]
ENSCAFG00000005286	SPTBN4	spectrin beta, non-erythrocytic 4 [Source:VGNC Symbol;Acc:VGNC:46777]
ENSCAFG00000002160	SPTLC1	serine palmitoyltransferase long chain base subunit 1 [Source:VGNC Symbol;Acc:VGNC:46779]
ENSCAFG00000017222	SPTLC2	serine palmitoyltransferase long chain base subunit 2 [Source:VGNC Symbol;Acc:VGNC:46780]
ENSCAFG00000000360	SQSTM1	sequestosome 1 [Source:VGNC Symbol;Acc:VGNC:46787]
ENSCAFG00000002554	SRBD1	S1 RNA binding domain 1 [Source:VGNC Symbol;Acc:VGNC:46790]
ENSCAFG00000016614	SRCIN1	SRC kinase signaling inhibitor 1 [Source:VGNC Symbol;Acc:VGNC:46792]
ENSCAFG00000018436	SREBF1	sterol regulatory element binding transcription factor 1 [Source:VGNC Symbol;Acc:VGNC:46795]
ENSCAFG00000001829	SRF	serum response factor [Source:VGNC Symbol;Acc:VGNC:46799]
ENSCAFG00000011392	SSPN	sarcospan [Source:HGNC Symbol;Acc:HGNC:11322]
ENSCAFG00000000149	STARD6	StAR related lipid transfer domain containing 6 [Source:VGNC Symbol;Acc:VGNC:46886]
ENSCAFG00000009797	STAT1	signal transducer and activator of transcription 1 [Source:HGNC Symbol;Acc:HGNC:11362]
ENSCAFG00000015213	STAT3	signal transducer and activator of transcription 3 [Source:VGNC Symbol;Acc:VGNC:46890]
ENSCAFG00000000163	STAT6	signal transducer and activator of transcription 6 [Source:VGNC Symbol;Acc:VGNC:46892]
ENSCAFG00000008077	STAU2	staufen double-stranded RNA binding protein 2 [Source:VGNC Symbol;Acc:VGNC:46894]
[truncated: 253 more rows]
